# Supplementary material for: Network Meta-Analysis of Chicken Microarray Data following Avian Influenza Challenge—A Comparison of Highly and Lowly Pathogenic Strains
Source: MDPI journal article supplement (doi:10.3390/genes13030435), 2022-02-26
Supplement: s1 [file s1]

**Supplementary Table S1: A non-exhaustive review of transcriptomic based network construction in chicken**

| <b>Technology</b> | <b>Software</b>                         | <b>Tissue</b>     | <b>Publication</b>           |
|-------------------|-----------------------------------------|-------------------|------------------------------|
| Microarray        | MIDAS, SAS                              | Hypothalamus      | Higgins et al., 2010 [44]    |
| Microarray        | GeneSpring, Beacon Designer             | Kidney            | Cong et al., 2013 [45]       |
| NGS               | DNASTAR                                 | Spleen, intestine | Hong et al., 2014 [46]       |
| RNA-Seq           | Deseq                                   | Mucus             | Luo et al., 2014 [47]        |
| RNA-eq,qPCR       | Fastx_clipper Fastx_toolkit, GSNAP      | Liver             | Coble et al., 2014 [48]      |
| Microarray        | GeneSpring, SPSS                        | Intestine         | Kim et al., 2014 [49]        |
| RNA-Seq           | Toolx, Fastx, FastQC, TopHat2, edgeR, R | Thymus            | Sun et al., 2016 [50]        |
| RNA-Seq           | DNASTAR, SAS                            | Breast muscle     | Chen et al., 2015 [51]       |
| Unigenes          | bowtie2, Mega, BLAST comparison         | Lymphocytes       | Tariq et al. 2015 [52]       |
| Microarray        | Affymetrix GCOS, Expression Console     | Embryonic         | Naraballoh et al., 2016 [53] |
| RNA –Seq          | FastQC, clipper fastX, Packet DESeq2    | Liver             | Lan et al., 2016 [54]        |
| RNA-Seq           | HTSeq, DES-R, KOBAS                     | Kidney            | Liu et al., 2017 [55]        |
| Microarray        | GENESPRING, CYTOSCAPE                   | Liver, spleen     | Ma et al., 2017 [56]         |
| RNA –Seq          | CytoScape, STRING, SPSS                 | Yellow Follicles  | Wang et al., 2017 [57]       |
| RNA –Seq          | SPSS, FastQC, RSeQC, edgeR              | Thyroid           | Xie et al., 2018 [58]        |
| RNA –Seq          | SPSS, DESeq                             | Leg muscle        | Wu et al., 2018 [59]         |
| RNA –Seq          | FastQC, NGN QC Toolkit, DESeq           | Spleen            | Qiu et al., 2018 [60]        |

**Supplementary Table S2: The network metric measures used in this study**

| Explanation                                                                                                                                                                                        | Formula                                                                  | Measures               |
|----------------------------------------------------------------------------------------------------------------------------------------------------------------------------------------------------|--------------------------------------------------------------------------|------------------------|
| The betweenness centrality of a node is the numeral of shortest paths between further nodes that run through the node of interest [61].                                                            | $B_v = \sum_{i=1}^{G-1} \sum_{j=i+1}^G \frac{c_{i,j}(v)}{c_{i,j}}$       | Betweenness Centrality |
| The closeness centrality of a node measures the centrality of a node based on how near it is to other nodes in the network [62].                                                                   | $C_i = \frac{1}{\sum_{nj \in N \setminus \{ni\}} H_{ni \rightarrow nj}}$ | Closeness Centrality   |
| Degree centrality is the number of nodes that a given node is connected to [62]. The degree $k_i$ of node $i$ is computed as follows.                                                              | $K_i = \sum_{j=1}^n A_{ij}$                                              | Degree Centrality      |
| Eigenvector centrality assigns each node a centrality that not only depends on the quantity of its connections, but also on their qualities [63].                                                  | $x_j = \frac{1}{\lambda} \sum_{j=1}^n A_{ij} x_j$                        | Eigenvector            |
| The harmonic mean is normalized by noting that on a star graph, the maximum is obtained by the node in the center and is $ V -1$ [64].                                                             | $C_H = \frac{2(n-1) \sum_i (C_{H \max_j} - C_H(x_j))}{n}$                | Harmonic Mean          |
| Load centrality a property fully defined by the graph structure and by the algorithm used to discover minimum weight paths [65].                                                                   | $LC_v = \sum_{s,d \in v} \theta_{s,d}(v)$                                | Load Centrality        |
| Counts the times that a node takes part in the different connected subgraphs of the network, with smaller subgraphs having higher importance [66].                                                 | $S(i) = \sum_{k=0}^{\infty} \frac{w_k(i)}{k!}$                           | Subgraph               |
| Clustering based on the concept of subgraph intensity, defined as the geometric average of subgraph edge weights, resulting edge weights are normalized by the maximum weight in the network [67]. | $c_u = \frac{2T(u)}{\deg(u)(\deg(u) - 1)}$                               | Clustering             |
| The average clustering criterion is obtained by calculating the average clustering criterion.                                                                                                      | $c = \frac{1}{n} \sum_{u \in G} c_u$                                     | Average Clustering     |

**Supplementary Table S3: Differentially expressed genes from LPAI data analysis**

| <b>Gene</b> | <b>Log2 Fold change</b> | <b>Fold change</b> | <b>p-value</b> |
|-------------|-------------------------|--------------------|----------------|
| GPX8        | 2.45                    | 5.48               | 0.001797       |
| COL9A1      | 2.44                    | 5.44               | 0.0003596      |
| OSGIN1      | 2.39                    | 5.23               | 0.0006649      |
| TNFSF10     | 2.37                    | 5.16               | 0.0004972      |
| TF          | 2.34                    | 5.06               | 0.002374       |
| RFFL        | 2.32                    | 5.00               | 0.002177       |
| MXD4        | 2.13                    | 4.37               | 0.0004258      |
| TCP11L2     | 2.10                    | 4.28               | 0.0007636      |
| COMMD8      | 2.06                    | 4.17               | 0.002014       |
| PCMTD1      | 2.05                    | 4.15               | 5.15E-07       |
| RIPK3       | 2.05                    | 4.15               | 2.96E-06       |
| EPYC        | 2.05                    | 4.13               | 0.0005793      |
| KRT15       | 2.05                    | 4.13               | 9.27E-05       |
| GEM         | 2.04                    | 4.12               | 7.16E-07       |
| IL13RA1     | 2.04                    | 4.12               | 3.16E-05       |
| APAF1       | 2.03                    | 4.08               | 0.001919       |
| FABP4       | 2.03                    | 4.08               | 0.001022       |
| IKBIP       | 2.02                    | 4.07               | 0.002005       |
| ARHGAP8     | 2.02                    | 4.06               | 0.001385       |
| BORCS6      | 2.02                    | 4.05               | 0.001384       |
| TIPARP      | 2.00                    | 4.01               | 0.001271       |
| GPR1        | 2.00                    | 4.00               | 0.0008197      |
| CMBL        | 2.00                    | 4.00               | 3.33E-05       |
| LY75        | 2.00                    | 4.00               | 0.0002498      |
| CD44        | 1.99                    | 3.98               | 7.26E-05       |
| CHODL       | 1.99                    | 3.98               | 0.0004185      |
| CPNE8       | 1.99                    | 3.98               | 3.15E-05       |
| CUL2        | 1.98                    | 3.95               | 0.00032        |
| CYTL1       | 1.98                    | 3.94               | 0.001869       |
| NKTR        | 1.97                    | 3.93               | 0.001218       |
| COL9A3      | 1.97                    | 3.91               | 4.39E-06       |
| PLSCR1      | 1.97                    | 3.91               | 0.001127       |
| AKR1D1      | 1.97                    | 3.90               | 0.001444       |
| EDNRB       | 1.96                    | 3.90               | 0.001222       |
| CDH1        | 1.95                    | 3.87               | 0.001578       |
| MYD88       | 1.95                    | 3.87               | 6.54E-06       |
| ZCCHC2      | 1.95                    | 3.86               | 6.82E-05       |
| TNFRSF6B    | 1.95                    | 3.85               | 0.0007762      |
| SAT1        | 1.94                    | 3.85               | 0.0008462      |
| NANP        | 1.94                    | 3.83               | 2.07E-07       |
| PPP1R17     | 1.94                    | 3.83               | 0.0008319      |
| CD200R1L    | 1.93                    | 3.82               | 0.001524       |
| BIRC2       | 1.93                    | 3.82               | 0.001222       |
| GLIPR1L     | 1.93                    | 3.81               | 0.002011       |
| HTR2B       | 1.93                    | 3.81               | 0.0005804      |
| RAB31       | 1.93                    | 3.81               | 0.001539       |
| SLC46A2     | 1.93                    | 3.81               | 0.0006222      |
| PIT54       | 1.93                    | 3.80               | 8.48E-06       |

|          |      |      |           |
|----------|------|------|-----------|
| FBP1     | 1.92 | 3.79 | 0.001728  |
| CG-16    | 1.92 | 3.78 | 0.002077  |
| FUNDC1   | 1.92 | 3.78 | 0.00156   |
| GFPT2    | 1.92 | 3.77 | 0.001181  |
| VNN1     | 1.92 | 3.77 | 0.0003668 |
| CUBN     | 1.91 | 3.77 | 0.001498  |
| EDNRA    | 1.91 | 3.76 | 0.002143  |
| CHST15   | 1.90 | 3.73 | 0.00166   |
| COMP     | 1.90 | 3.73 | 0.001082  |
| C1QTNF6  | 1.90 | 3.72 | 0.0008608 |
| ARHGAP15 | 1.89 | 3.72 | 5.61E-05  |
| LPCAT3   | 1.89 | 3.71 | 0.0004842 |
| NAT9     | 1.89 | 3.70 | 0.0007216 |
| ASB9     | 1.89 | 3.70 | 0.0009752 |
| SPP1     | 1.89 | 3.70 | 0.001311  |
| CAPN9    | 1.89 | 3.69 | 0.0006847 |
| LYRM1    | 1.88 | 3.69 | 0.0002464 |
| SERPIND1 | 1.88 | 3.68 | 0.001339  |
| TMEM168  | 1.88 | 3.68 | 3.49E-05  |
| CHST2    | 1.88 | 3.68 | 0.001622  |
| RAB36    | 1.88 | 3.68 | 0.0008856 |
| YPEL5    | 1.88 | 3.68 | 0.001143  |
| FMR1     | 1.88 | 3.68 | 0.0001082 |
| SPP2     | 1.88 | 3.67 | 9.89E-05  |
| N4BP2L1  | 1.88 | 3.67 | 0.0008834 |
| CSTF3    | 1.88 | 3.67 | 0.000139  |
| TTR      | 1.87 | 3.67 | 0.001284  |
| HAS2     | 1.87 | 3.66 | 5.23E-05  |
| ABRACL   | 1.87 | 3.66 | 0.0009105 |
| ACSL1    | 1.87 | 3.66 | 0.0004569 |
| UBE2V2   | 1.87 | 3.65 | 0.001754  |
| STX17    | 1.87 | 3.65 | 0.0001348 |
| TANGO2   | 1.87 | 3.65 | 0.001454  |
| APOA1    | 1.86 | 3.64 | 1.96E-05  |
| FGB      | 1.86 | 3.64 | 0.0001041 |
| BFAR     | 1.86 | 3.64 | 0.00109   |
| MAPK11   | 1.86 | 3.63 | 0.001449  |
| PDE4B    | 1.86 | 3.63 | 0.0006793 |
| HSPB11   | 1.86 | 3.63 | 0.002272  |
| PKIG     | 1.86 | 3.63 | 0.000472  |
| ARRDC1   | 1.86 | 3.62 | 0.0001534 |
| FCF1     | 1.86 | 3.62 | 0.0006475 |
| NSMCE2   | 1.86 | 3.62 | 0.001505  |
| GLUL     | 1.86 | 3.62 | 3.20E-07  |
| BCL2L10  | 1.85 | 3.62 | 0.0009866 |
| IL16     | 1.85 | 3.61 | 0.0003105 |
| CDKN2B   | 1.85 | 3.61 | 0.0007953 |
| FAM195A  | 1.85 | 3.61 | 0.001876  |
| TIMM21   | 1.85 | 3.61 | 0.0001278 |
| CETN3    | 1.85 | 3.61 | 0.000797  |

|           |      |      |           |
|-----------|------|------|-----------|
| PRPS2     | 1.85 | 3.61 | 0.0001945 |
| UBE2H     | 1.85 | 3.60 | 0.001322  |
| GSTO1     | 1.85 | 3.60 | 0.001696  |
| PTS       | 1.85 | 3.60 | 0.001484  |
| FAM180A   | 1.85 | 3.60 | 0.001696  |
| UPP1      | 1.85 | 3.59 | 0.001305  |
| LYRM2     | 1.84 | 3.59 | 0.0004162 |
| WIP1      | 1.84 | 3.59 | 0.00196   |
| NINJ1     | 1.84 | 3.58 | 2.98E-06  |
| HOXA6     | 1.84 | 3.58 | 0.001086  |
| NUDT7     | 1.84 | 3.58 | 0.001611  |
| SDHAF2    | 1.84 | 3.58 | 0.001189  |
| LOC420807 | 1.84 | 3.57 | 4.29E-05  |
| PLAGL1    | 1.83 | 3.56 | 0.0002544 |
| DYNLT1    | 1.83 | 3.56 | 0.001124  |
| IDNK      | 1.83 | 3.56 | 0.0003305 |
| LOC769756 | 1.83 | 3.56 | 0.00213   |
| NDFIP1    | 1.83 | 3.56 | 0.0001619 |
| NPL       | 1.83 | 3.55 | 0.0009393 |
| SNRNP25   | 1.83 | 3.55 | 0.0009809 |
| NUDT5     | 1.83 | 3.55 | 0.0003548 |
| CYBRD1    | 1.83 | 3.55 | 0.00129   |
| WDSUB1    | 1.83 | 3.54 | 0.0006421 |
| TRERF1    | 1.83 | 3.54 | 0.00155   |
| IRF6      | 1.83 | 3.54 | 2.40E-05  |
| KLF9      | 1.82 | 3.54 | 0.0004913 |
| CBWD1     | 1.82 | 3.54 | 0.001192  |
| PTGS2     | 1.82 | 3.54 | 0.001339  |
| PTP4A1    | 1.82 | 3.54 | 0.001226  |
| NDP       | 1.82 | 3.53 | 0.0006586 |
| MALL      | 1.82 | 3.53 | 2.74E-05  |
| PHYKPL    | 1.82 | 3.53 | 0.001164  |
| SLC40A1   | 1.82 | 3.53 | 0.0003653 |
| IFNAR2    | 1.82 | 3.53 | 0.001838  |
| SERPINB2  | 1.82 | 3.53 | 9.89E-05  |
| MMP15     | 1.82 | 3.52 | 0.0005942 |
| DACT2     | 1.82 | 3.52 | 0.0007958 |
| SULT1C3   | 1.82 | 3.52 | 0.001222  |
| FNDC3A    | 1.82 | 3.52 | 1.86E-05  |
| HPGD      | 1.81 | 3.52 | 0.0001599 |
| ITGB3BP   | 1.81 | 3.52 | 0.001639  |
| LOC416951 | 1.81 | 3.51 | 0.001276  |
| PDCD6     | 1.81 | 3.51 | 0.0006717 |
| CCLL4     | 1.81 | 3.51 | 0.0001266 |
| SELENOP1  | 1.81 | 3.51 | 0.0007952 |
| PSCA      | 1.81 | 3.51 | 0.0002428 |
| UBL3      | 1.81 | 3.50 | 0.001221  |
| MOSPD1    | 1.81 | 3.50 | 0.0002518 |
| LOC424401 | 1.81 | 3.50 | 0.0005672 |
| HNRNPKL   | 1.81 | 3.50 | 0.0007943 |

|           |      |      |           |
|-----------|------|------|-----------|
| DDTNFR23  | 1.81 | 3.50 | 0.002283  |
| FABP1     | 1.81 | 3.50 | 0.001786  |
| ABLIM2    | 1.81 | 3.50 | 0.001684  |
| LOC772080 | 1.81 | 3.50 | 0.001199  |
| TPMT      | 1.81 | 3.50 | 3.38E-05  |
| EIF4E2    | 1.81 | 3.50 | 0.001     |
| EPB41L3   | 1.80 | 3.49 | 0.001824  |
| MMP9      | 1.80 | 3.49 | 0.001849  |
| PCYT2     | 1.80 | 3.49 | 0.001237  |
| C22H8ORF4 | 1.80 | 3.49 | 0.001222  |
| KCNK12    | 1.80 | 3.49 | 0.0001029 |
| GABRA5    | 1.80 | 3.49 | 0.002223  |
| ADCYAP1   | 1.80 | 3.48 | 0.002332  |
| MND1      | 1.80 | 3.48 | 0.002349  |
| RAMAC     | 1.80 | 3.48 | 0.0007331 |
| CENPW     | 1.80 | 3.48 | 0.001577  |
| GSTK1     | 1.80 | 3.48 | 0.001263  |
| CMKLR1    | 1.80 | 3.48 | 0.001384  |
| ATP6V1G3  | 1.80 | 3.48 | 0.00182   |
| NCF4      | 1.80 | 3.48 | 0.0002489 |
| LGI1      | 1.80 | 3.48 | 0.0003024 |
| COMMD2    | 1.80 | 3.48 | 0.0004191 |
| SOX7      | 1.80 | 3.48 | 0.0002751 |
| PUDP      | 1.80 | 3.48 | 0.0005211 |
| ASTL      | 1.80 | 3.48 | 0.0008907 |
| SLCO4C1   | 1.80 | 3.47 | 0.0004637 |
| GLRX5     | 1.80 | 3.47 | 0.0002885 |
| AZIN2     | 1.80 | 3.47 | 0.0001853 |
| FAM171B   | 1.80 | 3.47 | 0.0003974 |
| GPR137B   | 1.80 | 3.47 | 2.83E-06  |
| HOXD8     | 1.79 | 3.47 | 0.0006426 |
| MAP3K7CL  | 1.79 | 3.47 | 0.000812  |
| IL20RA    | 1.79 | 3.47 | 0.0008163 |
| ST6GAL1   | 1.79 | 3.47 | 0.0003176 |
| GPX1      | 1.79 | 3.47 | 0.0008233 |
| COMMD7    | 1.79 | 3.46 | 0.002099  |
| NIM1KZ    | 1.79 | 3.46 | 3.34E-06  |
| PACRG     | 1.79 | 3.46 | 0.0009806 |
| PBDC1     | 1.79 | 3.46 | 0.001972  |
| FETUB     | 1.79 | 3.46 | 0.0006797 |
| PTCHD1    | 1.79 | 3.46 | 0.0002648 |
| MYOZ2     | 1.79 | 3.46 | 0.001601  |
| CALML4    | 1.79 | 3.46 | 0.0005663 |
| GPR143    | 1.79 | 3.46 | 0.0003212 |
| RNF11     | 1.79 | 3.46 | 0.0006759 |
| IL10RB    | 1.79 | 3.46 | 0.0002011 |
| HOXD12    | 1.79 | 3.46 | 0.0002027 |
| FGF7      | 1.79 | 3.46 | 0.001488  |
| PLCXD1    | 1.79 | 3.46 | 0.0008777 |
| ALDH1A1   | 1.79 | 3.46 | 0.0002369 |

|              |      |      |           |
|--------------|------|------|-----------|
| LOC101748561 | 1.79 | 3.45 | 0.0001944 |
| LOC101751113 | 1.79 | 3.45 | 0.0002619 |
| CCK          | 1.79 | 3.45 | 0.001789  |
| SIGMAR1      | 1.79 | 3.45 | 0.001984  |
| RPA3         | 1.78 | 3.45 | 0.0008517 |
| ETFRF1       | 1.78 | 3.44 | 0.001262  |
| KRT6A        | 1.78 | 3.44 | 0.0006926 |
| LIPA         | 1.78 | 3.44 | 0.001049  |
| ZDHHC9       | 1.78 | 3.44 | 0.00135   |
| BNIP3        | 1.78 | 3.44 | 1.49E-05  |
| NT5C1B       | 1.78 | 3.44 | 0.001078  |
| HOXB6        | 1.78 | 3.44 | 0.001461  |
| LHX4-AS1     | 1.78 | 3.44 | 0.001168  |
| MRPL33       | 1.78 | 3.44 | 0.001304  |
| MT3          | 1.78 | 3.44 | 0.00155   |
| KRT5         | 1.78 | 3.44 | 1.41E-05  |
| CTBS         | 1.78 | 3.44 | 0.0009421 |
| KXD1         | 1.78 | 3.44 | 0.0001883 |
| INS-IGF2     | 1.78 | 3.44 | 0.000635  |
| SELENOW      | 1.78 | 3.44 | 0.001351  |
| UBE2F        | 1.78 | 3.44 | 0.001791  |
| TRPV2        | 1.78 | 3.43 | 0.0003174 |
| OAZ2         | 1.78 | 3.43 | 0.000538  |
| SQSTM1       | 1.78 | 3.43 | 0.000367  |
| LOC768772    | 1.78 | 3.43 | 0.0003251 |
| GJB6         | 1.78 | 3.43 | 0.001221  |
| RER1         | 1.78 | 3.43 | 0.002343  |
| BEAN1        | 1.78 | 3.43 | 0.000167  |
| VSNL1        | 1.78 | 3.43 | 0.002127  |
| SLC30A5      | 1.78 | 3.43 | 0.002254  |
| AK3          | 1.78 | 3.43 | 0.0004638 |
| CASTOR2      | 1.78 | 3.42 | 0.0006379 |
| CYP2AC1      | 1.78 | 3.42 | 0.001488  |
| FAIM         | 1.78 | 3.42 | 0.0007969 |
| NFKBIA       | 1.78 | 3.42 | 1.79E-07  |
| TMEM9B       | 1.78 | 3.42 | 0.0008676 |
| DPY30        | 1.78 | 3.42 | 0.001453  |
| CAPZA2       | 1.78 | 3.42 | 0.002368  |
| MME          | 1.77 | 3.42 | 0.0005868 |
| TNFRSF21     | 1.77 | 3.42 | 0.00205   |
| RGS7BP       | 1.77 | 3.42 | 0.0001794 |
| AADAT        | 1.77 | 3.42 | 0.0004942 |
| BTN1A1       | 1.77 | 3.42 | 0.0005262 |
| TNIP2        | 1.77 | 3.42 | 0.0001942 |
| GCG          | 1.77 | 3.42 | 0.001015  |
| RHOC         | 1.77 | 3.42 | 1.30E-06  |
| RBM43        | 1.77 | 3.42 | 1.70E-06  |
| LAMTOR3      | 1.77 | 3.41 | 0.00173   |
| LOC101749574 | 1.77 | 3.41 | 0.0003864 |
| ESRP2        | 1.77 | 3.41 | 1.83E-05  |

|              |      |      |           |
|--------------|------|------|-----------|
| MRAS         | 1.77 | 3.41 | 0.0007813 |
| HAGH         | 1.77 | 3.41 | 0.001623  |
| MAP1LC3B2    | 1.77 | 3.41 | 0.0001273 |
| APOH         | 1.77 | 3.41 | 0.0001917 |
| CAB39L       | 1.77 | 3.41 | 9.09E-05  |
| C5H11orf58   | 1.77 | 3.41 | 0.001721  |
| LOC424109    | 1.77 | 3.41 | 0.00131   |
| MYL3         | 1.77 | 3.41 | 0.0001319 |
| FAHD2A       | 1.77 | 3.41 | 0.0009794 |
| MRPS33       | 1.77 | 3.41 | 6.33E-05  |
| SPIK5        | 1.77 | 3.40 | 3.21E-07  |
| FBLIM1       | 1.77 | 3.40 | 0.0002013 |
| GYG1         | 1.77 | 3.40 | 0.0001032 |
| KLHL5        | 1.77 | 3.40 | 0.001216  |
| ELL          | 1.77 | 3.40 | 0.002208  |
| VAT1         | 1.77 | 3.40 | 0.0002006 |
| TOR4A        | 1.77 | 3.40 | 1.48E-05  |
| IGSF21       | 1.77 | 3.40 | 0.00154   |
| AVDL         | 1.77 | 3.40 | 0.0003983 |
| DPM1         | 1.76 | 3.40 | 0.0003314 |
| B4GALNT4     | 1.76 | 3.40 | 0.000329  |
| NAIF1        | 1.76 | 3.40 | 0.001613  |
| HDAC8        | 1.76 | 3.39 | 0.00083   |
| HMGA1        | 1.76 | 3.39 | 0.001848  |
| LOC101749502 | 1.76 | 3.39 | 0.000833  |
| CCL17        | 1.76 | 3.39 | 0.001571  |
| FNDC5        | 1.76 | 3.39 | 0.0006811 |
| BAG2         | 1.76 | 3.39 | 0.002345  |
| ADNP         | 1.76 | 3.39 | 0.001692  |
| GPX4         | 1.76 | 3.39 | 0.001164  |
| THEMIS2      | 1.76 | 3.39 | 0.001313  |
| TRA2A        | 1.76 | 3.39 | 0.001689  |
| SF3A2        | 1.76 | 3.39 | 0.0004571 |
| TMEM138      | 1.76 | 3.39 | 0.0001201 |
| EDMPN1       | 1.76 | 3.39 | 0.0001864 |
| SCARA5       | 1.76 | 3.39 | 0.001551  |
| UPF2         | 1.76 | 3.39 | 0.001098  |
| WFDC2L       | 1.76 | 3.39 | 0.001443  |
| NDUFB3       | 1.76 | 3.39 | 0.0008818 |
| MPPED1       | 1.76 | 3.39 | 0.0002662 |
| MTUS2        | 1.76 | 3.39 | 0.00148   |
| FBXW8        | 1.76 | 3.38 | 6.21E-05  |
| PIP5K1B      | 1.76 | 3.38 | 0.0009525 |
| SLC3A1       | 1.76 | 3.38 | 0.00142   |
| PAK1IP1      | 1.76 | 3.38 | 0.001915  |
| CH25H        | 1.76 | 3.38 | 3.68E-06  |
| TMEM248      | 1.76 | 3.38 | 0.0006493 |
| LYRM4        | 1.76 | 3.38 | 7.67E-05  |
| COA3         | 1.76 | 3.38 | 0.0007025 |
| LOC769121    | 1.76 | 3.38 | 0.001441  |



|              |      |      |           |
|--------------|------|------|-----------|
| NMU          | 1.76 | 3.38 | 0.0008331 |
| ASS1         | 1.76 | 3.38 | 1.11E-07  |
| IL15         | 1.76 | 3.38 | 0.0005526 |
| PPP1R2       | 1.75 | 3.37 | 0.0011    |
| APC2         | 1.75 | 3.37 | 0.001599  |
| HOXB5        | 1.75 | 3.37 | 8.22E-06  |
| NGF          | 1.75 | 3.37 | 0.0003106 |
| CTNBL1       | 1.75 | 3.37 | 0.0004636 |
| LOC101748084 | 1.75 | 3.37 | 0.002373  |
| IRF2         | 1.75 | 3.37 | 0.0004167 |
| CACNG3       | 1.75 | 3.37 | 0.0001455 |
| SPATA22      | 1.75 | 3.37 | 0.001642  |
| BG8          | 1.75 | 3.37 | 0.002255  |
| ANGPTL1      | 1.75 | 3.37 | 5.31E-05  |
| CENPS        | 1.75 | 3.37 | 0.000675  |
| RPS14        | 1.75 | 3.37 | 0.002345  |
| GUK1         | 1.75 | 3.37 | 5.91E-05  |
| MKRN2OS      | 1.75 | 3.37 | 0.00232   |
| AQP9         | 1.75 | 3.37 | 0.0001922 |
| ZNF821       | 1.75 | 3.36 | 0.000552  |
| LSP1         | 1.75 | 3.36 | 0.0009663 |
| DALRD3       | 1.75 | 3.36 | 0.002225  |
| SLC30A4      | 1.75 | 3.36 | 0.001316  |
| GRTP1        | 1.75 | 3.36 | 0.000418  |
| MTAP         | 1.75 | 3.36 | 0.0001685 |
| ZDHHC6       | 1.75 | 3.36 | 0.0002195 |
| EIF2AK1      | 1.75 | 3.36 | 0.001974  |
| CDA          | 1.75 | 3.36 | 0.001016  |
| TMEM200C     | 1.75 | 3.36 | 0.0002257 |
| LOC101749012 | 1.75 | 3.36 | 0.0003407 |
| MAP3K8       | 1.75 | 3.36 | 0.001266  |
| KIAA1143     | 1.75 | 3.36 | 7.49E-05  |
| GNG13        | 1.75 | 3.36 | 0.001315  |
| TNFAIP2      | 1.75 | 3.36 | 0.001958  |
| SF3B5        | 1.75 | 3.36 | 0.0006068 |
| MGST3        | 1.75 | 3.36 | 0.001112  |
| AvBD9        | 1.75 | 3.36 | 6.26E-06  |
| TIMP3        | 1.75 | 3.36 | 0.0003652 |
| RPL35A       | 1.75 | 3.36 | 0.0001249 |
| HIKESHI      | 1.75 | 3.36 | 0.0008933 |
| PIGA         | 1.75 | 3.36 | 8.21E-06  |
| ANGPTL7      | 1.75 | 3.35 | 0.001597  |
| RFKL         | 1.75 | 3.35 | 0.000357  |
| PIIP5K1      | 1.75 | 3.35 | 0.001961  |
| HOMER2       | 1.75 | 3.35 | 0.001299  |
| SLC25A14     | 1.74 | 3.35 | 0.0006437 |
| LOC417056    | 1.74 | 3.35 | 9.12E-05  |
| ARHGDIB      | 1.74 | 3.35 | 0.0008455 |
| MFAP5        | 1.74 | 3.35 | 0.002351  |
| PGS1         | 1.74 | 3.35 | 0.0006136 |

|             |      |      |           |
|-------------|------|------|-----------|
| DDT         | 1.74 | 3.35 | 0.001767  |
| WDFY2       | 1.74 | 3.35 | 5.73E-06  |
| MGAT4B      | 1.74 | 3.35 | 0.0008417 |
| MRGPRH      | 1.74 | 3.35 | 0.0005413 |
| RFXANK      | 1.74 | 3.35 | 0.0001623 |
| AVP         | 1.74 | 3.35 | 0.001616  |
| DPCD        | 1.74 | 3.35 | 0.0008412 |
| SNX3        | 1.74 | 3.35 | 0.0005434 |
| SPCS1       | 1.74 | 3.35 | 0.001709  |
| DLEC1       | 1.74 | 3.35 | 0.0002332 |
| LIF         | 1.74 | 3.35 | 0.001576  |
| VSTM2L      | 1.74 | 3.35 | 0.001851  |
| ENY2        | 1.74 | 3.35 | 0.001325  |
| COLEC10     | 1.74 | 3.34 | 0.001878  |
| RBBP4       | 1.74 | 3.34 | 3.91E-05  |
| VSIG10L     | 1.74 | 3.34 | 0.0006331 |
| PNISR       | 1.74 | 3.34 | 0.001275  |
| ANGPT1      | 1.74 | 3.34 | 0.0001981 |
| SEMA3F      | 1.74 | 3.34 | 0.001278  |
| CISD3       | 1.74 | 3.34 | 0.000106  |
| C11H19orf12 | 1.74 | 3.34 | 0.0002498 |
| RIMS3       | 1.74 | 3.34 | 0.001825  |
| WRAP73      | 1.74 | 3.34 | 0.001225  |
| IL18        | 1.74 | 3.34 | 0.0001113 |
| GLYR1       | 1.74 | 3.34 | 0.001607  |
| MIEN1       | 1.74 | 3.34 | 0.001398  |
| RIPK4       | 1.74 | 3.34 | 7.21E-06  |
| TMEM121L    | 1.74 | 3.34 | 0.001789  |
| TMPRSS2     | 1.74 | 3.34 | 0.0007267 |
| TRIM8       | 1.74 | 3.34 | 0.002058  |
| NDUFB4      | 1.74 | 3.34 | 0.001983  |
| SS18L2      | 1.74 | 3.34 | 0.001302  |
| CTSB        | 1.74 | 3.34 | 0.0005234 |
| NHP2        | 1.74 | 3.34 | 0.0001601 |
| NME4        | 1.74 | 3.33 | 0.001297  |
| LEPROTL1    | 1.74 | 3.33 | 0.0004784 |
| KDELC2      | 1.74 | 3.33 | 0.0007374 |
| CALB2       | 1.74 | 3.33 | 0.0008188 |
| SMIM10L1    | 1.74 | 3.33 | 0.001553  |
| CCNI        | 1.74 | 3.33 | 6.28E-05  |
| CHRNA2      | 1.74 | 3.33 | 0.00168   |
| TPM2        | 1.74 | 3.33 | 0.001328  |
| EIF4H       | 1.74 | 3.33 | 0.0006512 |
| CARMIL1     | 1.74 | 3.33 | 0.0005049 |
| CKS1B       | 1.74 | 3.33 | 0.000547  |
| CMTR1       | 1.74 | 3.33 | 0.001555  |
| FGF2        | 1.74 | 3.33 | 0.0008131 |
| LSM5        | 1.74 | 3.33 | 0.0005114 |
| PRRG3       | 1.74 | 3.33 | 0.001305  |
| C14H16orf45 | 1.73 | 3.33 | 0.001402  |

|              |      |      |           |
|--------------|------|------|-----------|
| PFDN1        | 1.73 | 3.33 | 0.0006793 |
| DYNLRB2      | 1.73 | 3.33 | 0.0004255 |
| TMEM242      | 1.73 | 3.33 | 2.70E-05  |
| LOC100858311 | 1.73 | 3.33 | 0.001682  |
| PHYHD1       | 1.73 | 3.33 | 0.0008214 |
| PI3          | 1.73 | 3.33 | 0.0005995 |
| USP16        | 1.73 | 3.33 | 0.0009885 |
| GPX2         | 1.73 | 3.33 | 0.0005084 |
| TIMP4        | 1.73 | 3.33 | 8.13E-05  |
| ATP5ME       | 1.73 | 3.33 | 0.002188  |
| GPX7         | 1.73 | 3.33 | 0.001216  |
| FAM194A      | 1.73 | 3.33 | 0.001644  |
| TMBIM4       | 1.73 | 3.33 | 5.95E-05  |
| ADAMTS15     | 1.73 | 3.32 | 0.002072  |
| KIAA1671     | 1.73 | 3.32 | 0.002385  |
| TXNDC17      | 1.73 | 3.32 | 0.0002673 |
| GATA3        | 1.73 | 3.32 | 0.0002344 |
| HPSE2        | 1.73 | 3.32 | 0.001062  |
| SLC36A4      | 1.73 | 3.32 | 0.001696  |
| WDR88        | 1.73 | 3.32 | 0.002319  |
| PRELID1      | 1.73 | 3.32 | 0.000129  |
| CXCL12       | 1.73 | 3.32 | 0.0005034 |
| MSX2         | 1.73 | 3.32 | 0.001007  |
| CRTAC1       | 1.73 | 3.32 | 0.0006133 |
| RSP03        | 1.73 | 3.32 | 0.0004611 |
| B4GALT2      | 1.73 | 3.32 | 0.0004483 |
| CZH9ORF3     | 1.73 | 3.32 | 0.001092  |
| GPAT4        | 1.73 | 3.32 | 0.0002065 |
| CSTB         | 1.73 | 3.32 | 0.0001054 |
| AN1ZNF5L     | 1.73 | 3.32 | 0.0001056 |
| ZMAT5        | 1.73 | 3.32 | 0.001048  |
| TRUB2        | 1.73 | 3.32 | 0.0001181 |
| C5AR1        | 1.73 | 3.32 | 0.001942  |
| MRPL52       | 1.73 | 3.32 | 0.001043  |
| TDO2         | 1.73 | 3.31 | 0.0002915 |
| SLC4A8       | 1.73 | 3.31 | 0.002345  |
| LOC771972    | 1.73 | 3.31 | 0.001047  |
| FXVD2        | 1.73 | 3.31 | 0.0003815 |
| LOC101750765 | 1.73 | 3.31 | 0.000393  |
| NTAN1        | 1.73 | 3.31 | 0.0002622 |
| URM1         | 1.73 | 3.31 | 0.0001245 |
| TBX5         | 1.73 | 3.31 | 0.0002121 |
| URAH         | 1.73 | 3.31 | 0.001464  |
| LSMEM1       | 1.73 | 3.31 | 0.0002532 |
| SELENOU      | 1.73 | 3.31 | 0.001152  |
| WSB2         | 1.73 | 3.31 | 0.0004641 |
| ARL6IP5      | 1.73 | 3.31 | 0.000443  |
| MRPS25       | 1.73 | 3.31 | 0.0007921 |
| SMOX         | 1.73 | 3.31 | 3.59E-05  |
| PIN4         | 1.73 | 3.31 | 0.0002044 |

|              |      |      |           |
|--------------|------|------|-----------|
| CD83         | 1.73 | 3.31 | 0.0001895 |
| CENPV        | 1.73 | 3.31 | 1.71E-05  |
| IMMP2L       | 1.73 | 3.31 | 9.02E-05  |
| OGFR         | 1.73 | 3.31 | 6.84E-05  |
| HSBP1L1      | 1.73 | 3.31 | 0.002269  |
| COL16A1      | 1.73 | 3.31 | 0.001036  |
| SMIM7        | 1.72 | 3.31 | 0.0006083 |
| XPO1         | 1.72 | 3.30 | 0.0002878 |
| CHCHD7       | 1.72 | 3.30 | 3.30E-05  |
| CABP2        | 1.72 | 3.30 | 0.0004968 |
| CASP1        | 1.72 | 3.30 | 1.33E-05  |
| GBP1         | 1.72 | 3.30 | 0.0002371 |
| MORN4        | 1.72 | 3.30 | 0.0001608 |
| LOC100859471 | 1.72 | 3.30 | 0.002102  |
| S100A4       | 1.72 | 3.30 | 0.0002494 |
| TOMM6        | 1.72 | 3.30 | 0.001881  |
| XPR1         | 1.72 | 3.30 | 0.0002813 |
| APC          | 1.72 | 3.30 | 0.0008635 |
| NDUFB1       | 1.72 | 3.30 | 0.0006332 |
| PHACTR2      | 1.72 | 3.30 | 0.0001178 |
| TPPP         | 1.72 | 3.30 | 0.0004253 |
| JMJD4        | 1.72 | 3.30 | 7.58E-05  |
| SEC24A       | 1.72 | 3.30 | 0.0001595 |
| ANGPT1L      | 1.72 | 3.30 | 0.0007716 |
| UBE2D3       | 1.72 | 3.30 | 9.71E-05  |
| DNTTIP1      | 1.72 | 3.30 | 0.0001197 |
| TLR3         | 1.72 | 3.30 | 0.0004614 |
| TRIM66       | 1.72 | 3.30 | 0.0001633 |
| LOC418701    | 1.72 | 3.30 | 0.001531  |
| RAB34        | 1.72 | 3.30 | 0.001188  |
| FABP6        | 1.72 | 3.30 | 6.38E-05  |
| EEF1E1       | 1.72 | 3.30 | 0.00126   |
| LOC101749087 | 1.72 | 3.29 | 7.95E-05  |
| PARP11       | 1.72 | 3.29 | 0.002158  |
| TM2D1        | 1.72 | 3.29 | 9.62E-05  |
| ZCCHC13      | 1.72 | 3.29 | 9.91E-05  |
| COL3A1       | 1.72 | 3.29 | 0.0001422 |
| EIF4E3       | 1.72 | 3.29 | 2.04E-05  |
| EOGT         | 1.72 | 3.29 | 0.0002824 |
| HMGN5        | 1.72 | 3.29 | 0.001501  |
| LGALSL       | 1.72 | 3.29 | 0.0006053 |
| JADE2        | 1.72 | 3.29 | 0.001274  |
| PTGES3L      | 1.72 | 3.29 | 1.85E-05  |
| MRPL2        | 1.72 | 3.29 | 0.0004097 |
| RNF150       | 1.72 | 3.29 | 0.0001921 |
| LOC101750652 | 1.72 | 3.29 | 0.001045  |
| PDCD1LG2     | 1.72 | 3.29 | 0.000209  |
| SLC32A1      | 1.72 | 3.29 | 0.001018  |
| ZDHHC21      | 1.72 | 3.29 | 3.36E-05  |
| TTLL9        | 1.72 | 3.29 | 0.0008188 |

|           |      |      |           |
|-----------|------|------|-----------|
| PITX2     | 1.72 | 3.28 | 0.0003045 |
| HOXA10-AS | 1.72 | 3.28 | 7.71E-05  |
| ETV7      | 1.71 | 3.28 | 0.0002982 |
| SNRPG     | 1.71 | 3.28 | 0.0006842 |
| LOC396479 | 1.71 | 3.28 | 0.0001554 |
| NT5C3A    | 1.71 | 3.28 | 0.0001708 |
| CTC1      | 1.71 | 3.28 | 0.0008524 |
| HNRNPA2B1 | 1.71 | 3.28 | 0.001651  |
| MPC1      | 1.71 | 3.28 | 0.0001608 |
| FHL1      | 1.71 | 3.28 | 0.0004021 |
| MZT1      | 1.71 | 3.28 | 7.22E-05  |
| NPM3      | 1.71 | 3.28 | 0.000158  |
| PCASP3    | 1.71 | 3.28 | 3.35E-05  |
| ATP8A1    | 1.71 | 3.28 | 5.54E-06  |
| EI24      | 1.71 | 3.28 | 0.0002143 |
| CSRP3     | 1.71 | 3.28 | 2.60E-05  |
| DYNLT3    | 1.71 | 3.28 | 0.0008696 |
| CRB1      | 1.71 | 3.28 | 0.0003798 |
| GUCY1B4   | 1.71 | 3.28 | 0.000321  |
| CMC2      | 1.71 | 3.27 | 0.0001616 |
| PPP1R7    | 1.71 | 3.27 | 0.0005367 |
| PTRHD1    | 1.71 | 3.27 | 0.001423  |
| DCTN3     | 1.71 | 3.27 | 0.0003208 |
| GKAP1     | 1.71 | 3.27 | 7.09E-05  |
| CALHM6    | 1.71 | 3.27 | 0.0003547 |
| SSTR4     | 1.71 | 3.27 | 0.002183  |
| KCNMB1    | 1.71 | 3.27 | 9.97E-07  |
| SLC25A20  | 1.71 | 3.27 | 0.0002823 |
| LOC426097 | 1.71 | 3.27 | 0.0008101 |
| LOC420486 | 1.71 | 3.27 | 5.81E-07  |
| PPP2CB    | 1.71 | 3.27 | 0.001087  |
| MBP       | 1.71 | 3.27 | 0.0007939 |
| PLEKHA7   | 1.71 | 3.27 | 4.52E-05  |
| WDR31     | 1.71 | 3.27 | 0.0008647 |
| GGT5      | 1.71 | 3.27 | 0.0003733 |
| SLC12A3   | 1.71 | 3.27 | 0.0003882 |
| ARHGEF28  | 1.71 | 3.27 | 0.0002785 |
| SLC25A16  | 1.71 | 3.27 | 9.75E-05  |
| PTN       | 1.71 | 3.27 | 0.0005696 |
| MRPS16    | 1.71 | 3.27 | 0.0002494 |
| ROMO1     | 1.71 | 3.27 | 0.000126  |
| PAM16     | 1.71 | 3.26 | 7.09E-05  |
| ASPG      | 1.71 | 3.26 | 5.18E-05  |
| SHROOM4   | 1.71 | 3.26 | 0.001555  |
| SMIM4     | 1.71 | 3.26 | 0.0001307 |
| FAM122B   | 1.71 | 3.26 | 0.0001109 |
| MRPS21    | 1.71 | 3.26 | 7.62E-05  |
| ADORA2B   | 1.71 | 3.26 | 0.0002652 |
| FABP3     | 1.71 | 3.26 | 4.46E-06  |
| ZIC2      | 1.71 | 3.26 | 0.001654  |

|              |      |      |           |
|--------------|------|------|-----------|
| RPS27L       | 1.71 | 3.26 | 0.00088   |
| SLC35E3      | 1.71 | 3.26 | 0.002038  |
| SNU13        | 1.71 | 3.26 | 1.31E-05  |
| HIVEP1       | 1.71 | 3.26 | 0.002215  |
| IGFBP4       | 1.71 | 3.26 | 0.0006945 |
| LYZ          | 1.71 | 3.26 | 0.001946  |
| RASSF3       | 1.70 | 3.26 | 0.002201  |
| FBXW4        | 1.70 | 3.26 | 6.99E-05  |
| LOC101751481 | 1.70 | 3.26 | 0.001926  |
| NEK10        | 1.70 | 3.26 | 0.002019  |
| TGM2         | 1.70 | 3.26 | 6.10E-06  |
| TAF12        | 1.70 | 3.26 | 0.0001073 |
| EPDR1        | 1.70 | 3.26 | 0.0005242 |
| PPM1J        | 1.70 | 3.26 | 6.93E-05  |
| NFKBIZ       | 1.70 | 3.26 | 1.40E-06  |
| FGF10        | 1.70 | 3.26 | 0.0001127 |
| SNX22        | 1.70 | 3.26 | 0.001755  |
| CHURC1       | 1.70 | 3.26 | 0.0007654 |
| CCDC141      | 1.70 | 3.25 | 0.001593  |
| GINM1        | 1.70 | 3.25 | 7.63E-07  |
| PLEKHB2      | 1.70 | 3.25 | 9.90E-05  |
| SNRPC        | 1.70 | 3.25 | 0.0005657 |
| UCKL1        | 1.70 | 3.25 | 0.000815  |
| NRSN1        | 1.70 | 3.25 | 9.95E-05  |
| CRYGN        | 1.70 | 3.25 | 0.00174   |
| MROH2B1      | 1.70 | 3.25 | 0.0002784 |
| FDX1L        | 1.70 | 3.25 | 1.85E-05  |
| OLFML1       | 1.70 | 3.25 | 0.000111  |
| MED31        | 1.70 | 3.25 | 2.11E-05  |
| STRADB       | 1.70 | 3.25 | 0.001355  |
| DCTN5        | 1.70 | 3.25 | 1.74E-05  |
| NAA20        | 1.70 | 3.25 | 0.0003919 |
| HMGN3        | 1.70 | 3.25 | 0.0003207 |
| C12orf40     | 1.70 | 3.25 | 0.0009513 |
| COPS9        | 1.70 | 3.25 | 0.001742  |
| CYCS         | 1.70 | 3.25 | 0.0001081 |
| GNG4         | 1.70 | 3.25 | 9.19E-05  |
| UPF3A        | 1.70 | 3.25 | 0.0002979 |
| KCNK10       | 1.70 | 3.25 | 0.0009066 |
| RBM18        | 1.70 | 3.25 | 4.72E-05  |
| ZNF692       | 1.70 | 3.25 | 0.0003479 |
| TMEM251      | 1.70 | 3.25 | 0.001011  |
| IGDCC3       | 1.70 | 3.25 | 0.0002236 |
| C1H11ORF70   | 1.70 | 3.25 | 2.89E-05  |
| RPRD2        | 1.70 | 3.25 | 0.0007822 |
| CLSTN3       | 1.70 | 3.25 | 0.001148  |
| PFDN5        | 1.70 | 3.25 | 0.0002375 |
| RSL24D1      | 1.70 | 3.25 | 7.04E-05  |
| LOC101747452 | 1.70 | 3.25 | 0.001004  |
| CXCL14       | 1.70 | 3.25 | 2.50E-05  |

|              |      |      |           |
|--------------|------|------|-----------|
| NCOA7        | 1.70 | 3.25 | 0.0001221 |
| JAM2         | 1.70 | 3.25 | 1.43E-05  |
| LY6CLEL      | 1.70 | 3.25 | 8.90E-08  |
| PVALB        | 1.70 | 3.25 | 5.64E-05  |
| IL1RL1       | 1.70 | 3.24 | 2.47E-05  |
| GBE          | 1.70 | 3.24 | 0.0005691 |
| LOC395325    | 1.70 | 3.24 | 5.10E-05  |
| RPL29        | 1.70 | 3.24 | 0.0001149 |
| PATL2        | 1.70 | 3.24 | 6.83E-05  |
| KAT2B        | 1.70 | 3.24 | 5.21E-06  |
| EIF4EBP1     | 1.70 | 3.24 | 0.0001623 |
| NARF         | 1.70 | 3.24 | 0.0003135 |
| ATP5MF       | 1.70 | 3.24 | 0.00153   |
| TMEM243      | 1.70 | 3.24 | 2.39E-10  |
| CARD8        | 1.70 | 3.24 | 9.86E-09  |
| TIFA         | 1.70 | 3.24 | 0.000219  |
| RFC1         | 1.70 | 3.24 | 0.002265  |
| HSF1         | 1.70 | 3.24 | 4.14E-06  |
| NAMPT        | 1.70 | 3.24 | 3.06E-10  |
| DNAJC18      | 1.69 | 3.24 | 0.0003815 |
| SMDT1        | 1.69 | 3.24 | 0.0001394 |
| SPTBN5       | 1.69 | 3.24 | 3.01E-05  |
| LGALS3       | 1.69 | 3.24 | 1.16E-05  |
| LOC420411    | 1.69 | 3.23 | 0.002205  |
| PSMG4        | 1.69 | 3.23 | 3.41E-05  |
| ARIH1        | 1.69 | 3.23 | 0.0006212 |
| DLAT         | 1.69 | 3.23 | 0.0005872 |
| LOC101751448 | 1.69 | 3.23 | 0.0002817 |
| MBNL3        | 1.69 | 3.23 | 0.0001733 |
| DRAM2        | 1.69 | 3.23 | 4.37E-05  |
| TG           | 1.69 | 3.23 | 0.0004852 |
| PECAM1       | 1.69 | 3.23 | 0.0003725 |
| RILPL2       | 1.69 | 3.23 | 3.13E-05  |
| LOC422757    | 1.69 | 3.23 | 0.001465  |
| NDUFB2       | 1.69 | 3.23 | 0.0002204 |
| SFSWAP       | 1.69 | 3.23 | 0.0005176 |
| LAMTOR2      | 1.69 | 3.23 | 5.09E-05  |
| PTGDS        | 1.69 | 3.23 | 2.61E-05  |
| RGS10        | 1.69 | 3.23 | 0.0003639 |
| CALML3       | 1.69 | 3.23 | 4.71E-06  |
| TMEM100      | 1.69 | 3.23 | 4.62E-05  |
| LOC420716    | 1.69 | 3.23 | 7.46E-05  |
| TNFAIP6      | 1.69 | 3.23 | 0.0001839 |
| ERG          | 1.69 | 3.23 | 0.0005866 |
| NBN          | 1.69 | 3.23 | 1.71E-07  |
| SMCHD1       | 1.69 | 3.22 | 3.67E-07  |
| SLC25A32     | 1.69 | 3.22 | 0.001532  |
| TRIM41       | 1.69 | 3.22 | 0.001553  |
| SMIM14       | 1.69 | 3.22 | 0.0001796 |
| RTKN2        | 1.69 | 3.22 | 0.001463  |

|             |      |      |           |
|-------------|------|------|-----------|
| COX7C       | 1.69 | 3.22 | 0.00027   |
| MKRN1       | 1.69 | 3.22 | 1.25E-05  |
| COA5        | 1.69 | 3.22 | 0.0005508 |
| RPL38       | 1.69 | 3.22 | 0.001341  |
| BLB1        | 1.69 | 3.22 | 0.0009221 |
| COTL1       | 1.69 | 3.22 | 0.000212  |
| MAB21L1     | 1.69 | 3.22 | 0.0009555 |
| C10H15orf40 | 1.69 | 3.22 | 8.78E-06  |
| BRIP1       | 1.69 | 3.22 | 0.0004465 |
| NLRC5       | 1.69 | 3.22 | 0.0002643 |
| CLK1        | 1.69 | 3.22 | 0.0002499 |
| USP30       | 1.69 | 3.22 | 6.97E-05  |
| RPL22L1     | 1.69 | 3.22 | 3.46E-05  |
| ATP5F1E     | 1.69 | 3.22 | 5.96E-06  |
| KCNJ5       | 1.69 | 3.22 | 1.63E-09  |
| SMAD7       | 1.69 | 3.22 | 0.0002353 |
| HMX3        | 1.69 | 3.22 | 0.001683  |
| PARP6       | 1.68 | 3.22 | 4.15E-05  |
| ACOT7       | 1.68 | 3.21 | 7.43E-05  |
| STMP1       | 1.68 | 3.21 | 0.0005718 |
| CATH1       | 1.68 | 3.21 | 0.001327  |
| PDZK1IP1    | 1.68 | 3.21 | 0.0002875 |
| SRP9        | 1.68 | 3.21 | 1.91E-05  |
| HMGA2       | 1.68 | 3.21 | 0.001146  |
| LOC771277   | 1.68 | 3.21 | 0.001091  |
| ETS1        | 1.68 | 3.21 | 0.001519  |
| GNG2        | 1.68 | 3.21 | 1.91E-05  |
| C17H9orf16  | 1.68 | 3.21 | 3.67E-05  |
| LOC771161   | 1.68 | 3.21 | 8.34E-05  |
| TWIST2      | 1.68 | 3.21 | 9.18E-07  |
| HOXA7       | 1.68 | 3.21 | 3.10E-06  |
| TXNDC12     | 1.68 | 3.21 | 0.0002857 |
| GBX2        | 1.68 | 3.21 | 7.24E-05  |
| HRAS        | 1.68 | 3.21 | 2.43E-05  |
| ALDOB       | 1.68 | 3.21 | 2.56E-08  |
| GLIPR2      | 1.68 | 3.21 | 7.23E-05  |
| SOX9        | 1.68 | 3.21 | 0.001155  |
| TMEM173     | 1.68 | 3.21 | 0.0001358 |
| THYN1       | 1.68 | 3.21 | 2.58E-05  |
| EVL         | 1.68 | 3.20 | 8.00E-04  |
| CHMP6       | 1.68 | 3.20 | 1.39E-06  |
| ENS-1       | 1.68 | 3.20 | 6.46E-07  |
| SH3BGRL3    | 1.68 | 3.20 | 5.69E-06  |
| RNF19B      | 1.68 | 3.20 | 7.95E-10  |
| SSU72       | 1.68 | 3.20 | 3.22E-05  |
| RPS12       | 1.68 | 3.20 | 0.0002133 |
| TRIAP1      | 1.68 | 3.20 | 7.53E-05  |
| TMEM123     | 1.68 | 3.20 | 0.0004099 |
| HOXC10      | 1.68 | 3.20 | 1.92E-06  |
| LOC408038   | 1.68 | 3.20 | 1.63E-05  |



|              |      |      |           |
|--------------|------|------|-----------|
| RPLP2        | 1.68 | 3.20 | 0.0001804 |
| MCHR2        | 1.68 | 3.20 | 0.0002831 |
| LOC419842    | 1.68 | 3.19 | 4.17E-05  |
| B3GAT3       | 1.67 | 3.19 | 4.69E-06  |
| LOC396480    | 1.67 | 3.19 | 0.0002147 |
| IRF5         | 1.67 | 3.19 | 0.001228  |
| RRH          | 1.67 | 3.19 | 0.0001643 |
| OLFM1        | 1.67 | 3.19 | 0.0003214 |
| LMO7         | 1.67 | 3.19 | 6.52E-05  |
| PCBP3        | 1.67 | 3.19 | 0.0001247 |
| TTN          | 1.67 | 3.19 | 0.0001749 |
| NTN4L        | 1.67 | 3.19 | 5.69E-05  |
| WWC1         | 1.67 | 3.19 | 3.98E-06  |
| FOXJ1        | 1.67 | 3.19 | 4.68E-06  |
| DUS1L        | 1.67 | 3.19 | 0.0003736 |
| PRELID3B     | 1.67 | 3.18 | 2.97E-05  |
| NPDC1        | 1.67 | 3.18 | 0.0003662 |
| NBL1         | 1.67 | 3.18 | 2.55E-05  |
| TPT1         | 1.67 | 3.18 | 3.45E-05  |
| COLQ         | 1.67 | 3.18 | 0.0001216 |
| CX3CL1       | 1.67 | 3.18 | 0.0001759 |
| TIMM13       | 1.67 | 3.18 | 4.32E-06  |
| DUSP23       | 1.67 | 3.18 | 1.30E-05  |
| PPIC         | 1.67 | 3.18 | 9.13E-05  |
| BSG          | 1.67 | 3.18 | 3.73E-05  |
| ADAMTS6      | 1.67 | 3.18 | 0.000443  |
| HOXC9        | 1.67 | 3.18 | 3.62E-08  |
| ACOD1        | 1.67 | 3.18 | 0.0003372 |
| C1R          | 1.67 | 3.18 | 1.13E-06  |
| DCTN6        | 1.67 | 3.18 | 2.73E-05  |
| GKN2         | 1.67 | 3.18 | 3.66E-05  |
| LOC426640    | 1.67 | 3.18 | 1.18E-05  |
| FAM168A      | 1.67 | 3.18 | 7.21E-05  |
| METTL6       | 1.67 | 3.18 | 2.88E-05  |
| TGFB1        | 1.67 | 3.18 | 3.68E-05  |
| MSRB3        | 1.67 | 3.18 | 0.0002332 |
| LOC101748460 | 1.67 | 3.17 | 7.60E-05  |
| FKBP7        | 1.67 | 3.17 | 8.80E-05  |
| SH2D4B       | 1.67 | 3.17 | 9.55E-05  |
| CABP7        | 1.67 | 3.17 | 0.0003841 |
| FAM133B      | 1.67 | 3.17 | 4.44E-05  |
| CREBRF       | 1.67 | 3.17 | 1.24E-05  |
| IL5RA        | 1.67 | 3.17 | 0.0003508 |
| PRMT8        | 1.67 | 3.17 | 4.98E-06  |
| BMF          | 1.66 | 3.17 | 3.96E-07  |
| LOC100857215 | 1.66 | 3.17 | 4.76E-05  |
| PPY          | 1.66 | 3.17 | 0.0001549 |
| ATP6AP1      | 1.66 | 3.17 | 0.0001755 |
| LAPTM4A      | 1.66 | 3.17 | 0.000296  |
| SERPINA10    | 1.66 | 3.17 | 4.58E-06  |

|              |      |      |           |
|--------------|------|------|-----------|
| CHTOP        | 1.66 | 3.17 | 2.42E-05  |
| ACOT2        | 1.66 | 3.17 | 5.32E-05  |
| FUT10        | 1.66 | 3.17 | 1.24E-06  |
| GNLY         | 1.66 | 3.17 | 0.0004364 |
| GMDS         | 1.66 | 3.17 | 0.0001524 |
| OSTF1        | 1.66 | 3.17 | 3.88E-05  |
| LMO2         | 1.66 | 3.17 | 2.69E-06  |
| DNAJB14      | 1.66 | 3.16 | 9.35E-05  |
| EBAG9        | 1.66 | 3.16 | 1.14E-06  |
| GHRL         | 1.66 | 3.16 | 2.26E-06  |
| HYPK         | 1.66 | 3.16 | 1.56E-05  |
| IL4I1        | 1.66 | 3.16 | 4.08E-06  |
| FKBP1A       | 1.66 | 3.16 | 4.97E-05  |
| TRANK1       | 1.66 | 3.16 | 4.27E-05  |
| C9ORF58      | 1.66 | 3.16 | 0.0001783 |
| CA3B         | 1.66 | 3.16 | 1.29E-06  |
| CTTN         | 1.66 | 3.15 | 0.002365  |
| SLC13A4      | 1.66 | 3.15 | 0.0003011 |
| ZDHHC4       | 1.66 | 3.15 | 1.27E-07  |
| LOC101749803 | 1.66 | 3.15 | 0.001796  |
| RAP2C        | 1.66 | 3.15 | 4.02E-05  |
| APIP         | 1.66 | 3.15 | 2.26E-05  |
| XG           | 1.66 | 3.15 | 1.35E-05  |
| ANKRD42      | 1.66 | 3.15 | 0.0001488 |
| FANCA        | 1.66 | 3.15 | 0.0001727 |
| CSTA         | 1.66 | 3.15 | 2.99E-06  |
| C1orf53      | 1.66 | 3.15 | 3.66E-06  |
| SELENOK      | 1.66 | 3.15 | 1.70E-05  |
| CD99L2       | 1.65 | 3.15 | 7.13E-05  |
| FAM198A      | 1.65 | 3.15 | 0.002122  |
| RBX1         | 1.65 | 3.15 | 1.81E-05  |
| TFPI         | 1.65 | 3.15 | 1.97E-06  |
| TSPO         | 1.65 | 3.14 | 2.62E-06  |
| NAA38        | 1.65 | 3.14 | 8.56E-05  |
| PTGES        | 1.65 | 3.14 | 2.52E-05  |
| C1H12ORF57   | 1.65 | 3.14 | 1.23E-06  |
| RPS25        | 1.65 | 3.14 | 1.87E-05  |
| ASIC1        | 1.65 | 3.14 | 0.0003976 |
| TMEM14A      | 1.65 | 3.14 | 1.07E-06  |
| UBE2D1       | 1.65 | 3.14 | 1.23E-06  |
| JPH3         | 1.65 | 3.14 | 5.46E-07  |
| PNKD         | 1.65 | 3.14 | 6.97E-05  |
| SRC          | 1.65 | 3.14 | 0.001362  |
| THY1         | 1.65 | 3.13 | 8.31E-05  |
| GTF3C6       | 1.65 | 3.13 | 2.20E-06  |
| ABCC6        | 1.65 | 3.13 | 0.001373  |
| CFD          | 1.65 | 3.13 | 5.00E-05  |
| YF6          | 1.65 | 3.13 | 6.65E-06  |
| HSCB         | 1.65 | 3.13 | 1.38E-05  |
| USMG5        | 1.65 | 3.13 | 5.66E-06  |

|              |      |      |           |
|--------------|------|------|-----------|
| LOC420770    | 1.65 | 3.13 | 2.77E-07  |
| TMEM61       | 1.65 | 3.13 | 9.25E-07  |
| ASPN         | 1.65 | 3.13 | 4.06E-06  |
| LGALS2       | 1.65 | 3.13 | 4.27E-06  |
| HOXB4        | 1.65 | 3.13 | 3.43E-06  |
| MPV17        | 1.65 | 3.13 | 2.84E-06  |
| LOC769729    | 1.65 | 3.13 | 3.49E-07  |
| USP4         | 1.64 | 3.13 | 0.001951  |
| PYGB         | 1.64 | 3.13 | 0.001689  |
| VPS72        | 1.64 | 3.13 | 1.06E-05  |
| HCFC2        | 1.64 | 3.13 | 0.00116   |
| SGCE         | 1.64 | 3.12 | 0.0001159 |
| CYP27C1      | 1.64 | 3.12 | 1.11E-05  |
| NR4A2        | 1.64 | 3.12 | 3.50E-06  |
| TMEM14C      | 1.64 | 3.12 | 5.73E-07  |
| UQCR10       | 1.64 | 3.12 | 1.99E-05  |
| MYCBP        | 1.64 | 3.12 | 3.38E-06  |
| UBE2I        | 1.64 | 3.12 | 1.33E-05  |
| AZI2         | 1.64 | 3.12 | 1.73E-06  |
| PDRG1        | 1.64 | 3.12 | 1.64E-06  |
| LBFABP       | 1.64 | 3.12 | 2.89E-07  |
| PDXDC1       | 1.64 | 3.11 | 0.0001362 |
| RPL9         | 1.64 | 3.11 | 0.0001626 |
| HELZ2        | 1.64 | 3.11 | 4.67E-06  |
| MBD2         | 1.64 | 3.11 | 2.02E-06  |
| GPX3         | 1.64 | 3.11 | 0.0001315 |
| C8G          | 1.64 | 3.11 | 1.20E-06  |
| MMP13        | 1.64 | 3.11 | 9.65E-07  |
| LOC100858647 | 1.64 | 3.11 | 2.82E-06  |
| MMP24        | 1.64 | 3.11 | 4.74E-05  |
| TNIP1        | 1.64 | 3.11 | 0.0001005 |
| NDUFA2       | 1.64 | 3.11 | 2.67E-07  |
| MB           | 1.64 | 3.11 | 9.25E-08  |
| LOC426155    | 1.64 | 3.11 | 1.89E-07  |
| UQCRB        | 1.64 | 3.11 | 8.43E-07  |
| CDK2AP1      | 1.64 | 3.11 | 3.59E-06  |
| MINDY3       | 1.64 | 3.11 | 1.40E-06  |
| CYP24A1      | 1.63 | 3.10 | 1.09E-06  |
| UBC          | 1.63 | 3.10 | 1.39E-05  |
| HEXIM1       | 1.63 | 3.10 | 2.12E-07  |
| CIB1         | 1.63 | 3.10 | 8.86E-07  |
| EXFABP       | 1.63 | 3.10 | 1.17E-07  |
| UQCR11       | 1.63 | 3.10 | 1.93E-05  |
| KCNMB2       | 1.63 | 3.09 | 1.32E-05  |
| RPL21        | 1.63 | 3.09 | 0.0002114 |
| LOC101750251 | 1.63 | 3.09 | 3.74E-07  |
| SYNJ2BP      | 1.63 | 3.09 | 3.35E-09  |
| CD226        | 1.63 | 3.09 | 0.0001989 |
| PPP2R2B      | 1.63 | 3.09 | 8.58E-07  |
| PFDN4        | 1.63 | 3.09 | 2.30E-06  |

|              |      |      |           |
|--------------|------|------|-----------|
| JTB          | 1.63 | 3.09 | 2.54E-06  |
| HIST1H110    | 1.63 | 3.09 | 0.0002348 |
| CCAH221      | 1.63 | 3.09 | 4.52E-08  |
| MTFP1        | 1.63 | 3.09 | 1.17E-06  |
| RHOF         | 1.63 | 3.09 | 0.0001285 |
| GUCD1        | 1.63 | 3.09 | 0.0004398 |
| ELF3         | 1.62 | 3.08 | 3.85E-07  |
| GLCCI1       | 1.62 | 3.08 | 0.001501  |
| SEC11C       | 1.62 | 3.08 | 7.14E-06  |
| QPCTL        | 1.62 | 3.08 | 5.46E-06  |
| RSRP1        | 1.62 | 3.08 | 9.86E-06  |
| LINGO1       | 1.62 | 3.08 | 7.18E-07  |
| CHRNA5       | 1.62 | 3.08 | 0.0003311 |
| MRPS36       | 1.62 | 3.08 | 2.15E-06  |
| POLR2L       | 1.62 | 3.08 | 1.42E-06  |
| LCT          | 1.62 | 3.08 | 0.0007661 |
| LOC101750843 | 1.62 | 3.08 | 5.36E-06  |
| SLC25A37     | 1.62 | 3.08 | 1.51E-06  |
| IRAK2        | 1.62 | 3.07 | 0.0007552 |
| PPDPF        | 1.62 | 3.07 | 5.16E-08  |
| HIGD2B       | 1.62 | 3.07 | 1.39E-06  |
| MINOS1       | 1.62 | 3.07 | 2.58E-07  |
| GIMAP8L2     | 1.62 | 3.07 | 1.82E-06  |
| DBNDD2       | 1.62 | 3.07 | 6.47E-07  |
| TMEM57       | 1.62 | 3.07 | 0.001738  |
| BF2          | 1.62 | 3.07 | 4.78E-06  |
| EAF2         | 1.62 | 3.07 | 9.85E-06  |
| TRAF5        | 1.62 | 3.06 | 3.62E-07  |
| RPL18A       | 1.62 | 3.06 | 5.78E-06  |
| PITX1        | 1.61 | 3.06 | 1.05E-07  |
| HOXB1        | 1.61 | 3.06 | 7.56E-07  |
| HORMAD2      | 1.61 | 3.06 | 1.42E-07  |
| MTPN         | 1.61 | 3.06 | 2.09E-05  |
| HIST2H3      | 1.61 | 3.06 | 3.84E-06  |
| XPA          | 1.61 | 3.06 | 6.61E-08  |
| SIIL         | 1.61 | 3.06 | 3.04E-06  |
| TUSC2        | 1.61 | 3.05 | 2.66E-07  |
| HENMT1       | 1.61 | 3.05 | 0.0003587 |
| ITGB3        | 1.61 | 3.05 | 2.36E-06  |
| HIST1H2A4    | 1.61 | 3.05 | 5.02E-06  |
| RSRC2        | 1.61 | 3.05 | 0.001214  |
| SLC26A9      | 1.61 | 3.05 | 1.86E-05  |
| MGP          | 1.61 | 3.05 | 2.26E-08  |
| PCBD2        | 1.61 | 3.04 | 4.47E-07  |
| LRFN3        | 1.61 | 3.04 | 3.38E-07  |
| RCAN1        | 1.60 | 3.04 | 0.0001764 |
| DNLZ         | 1.60 | 3.04 | 2.11E-07  |
| MMD          | 1.60 | 3.04 | 5.07E-07  |
| CDKN2A       | 1.60 | 3.04 | 2.87E-09  |
| RBP5         | 1.60 | 3.04 | 1.61E-09  |

|              |      |      |           |
|--------------|------|------|-----------|
| RBM38        | 1.60 | 3.04 | 5.24E-06  |
| TRABD2B      | 1.60 | 3.04 | 0.0007513 |
| CNP          | 1.60 | 3.03 | 4.83E-09  |
| LAMTOR5      | 1.60 | 3.03 | 1.65E-06  |
| OMA1         | 1.60 | 3.03 | 3.70E-06  |
| NFYB         | 1.60 | 3.03 | 8.78E-08  |
| VPS26C       | 1.60 | 3.03 | 0.0002399 |
| HACD1        | 1.60 | 3.03 | 2.74E-07  |
| SPON2        | 1.60 | 3.03 | 6.21E-09  |
| LOC770450    | 1.60 | 3.03 | 9.95E-09  |
| CRISPLD2     | 1.60 | 3.03 | 0.0009397 |
| HDGFL1       | 1.60 | 3.03 | 2.35E-07  |
| ANKMY1       | 1.60 | 3.03 | 0.0008778 |
| TACSTD2      | 1.60 | 3.02 | 2.00E-07  |
| CXorf21      | 1.60 | 3.02 | 2.69E-05  |
| IL13RA2      | 1.60 | 3.02 | 2.21E-06  |
| TUBB1        | 1.60 | 3.02 | 7.33E-07  |
| SELENOH      | 1.59 | 3.02 | 9.03E-08  |
| HPS5         | 1.59 | 3.02 | 3.04E-07  |
| SMKR1        | 1.59 | 3.02 | 1.58E-08  |
| KCNJ15       | 1.59 | 3.02 | 7.19E-08  |
| B2M          | 1.59 | 3.02 | 3.17E-06  |
| NOS2         | 1.59 | 3.02 | 3.31E-07  |
| MUSTN1       | 1.59 | 3.02 | 3.28E-07  |
| PTBP2        | 1.59 | 3.01 | 0.0003944 |
| ELOC         | 1.59 | 3.01 | 2.41E-08  |
| UQCRQ        | 1.59 | 3.01 | 1.61E-07  |
| C3H8ORF80    | 1.59 | 3.01 | 1.17E-07  |
| IL1B         | 1.59 | 3.01 | 3.53E-06  |
| GREM1        | 1.59 | 3.01 | 0.000109  |
| RBP7         | 1.59 | 3.01 | 7.65E-08  |
| PMAIP1       | 1.59 | 3.01 | 7.92E-07  |
| ABCA12       | 1.59 | 3.00 | 3.30E-07  |
| CACNA1B      | 1.59 | 3.00 | 3.89E-06  |
| LOC419404    | 1.59 | 3.00 | 1.58E-07  |
| ACYP2        | 1.59 | 3.00 | 1.84E-08  |
| ARPP19       | 1.59 | 3.00 | 5.88E-06  |
| LEAP2        | 1.58 | 3.00 | 1.77E-08  |
| RAP1A        | 1.58 | 3.00 | 4.60E-08  |
| NDUFAF8      | 1.58 | 3.00 | 2.22E-07  |
| LOC100857266 | 1.58 | 3.00 | 2.47E-09  |
| DLG3         | 1.58 | 3.00 | 2.08E-07  |
| NCS1         | 1.58 | 2.99 | 6.57E-06  |
| LOC769486    | 1.58 | 2.99 | 7.79E-08  |
| SLC34A2      | 1.58 | 2.99 | 1.21E-06  |
| PLAU         | 1.58 | 2.98 | 9.24E-06  |
| LY6E         | 1.58 | 2.98 | 4.89E-08  |
| YF5          | 1.57 | 2.98 | 5.31E-08  |
| CYSTM1       | 1.57 | 2.98 | 5.95E-07  |
| B3GNT7       | 1.57 | 2.98 | 4.09E-06  |

|              |      |      |           |
|--------------|------|------|-----------|
| DNAH7        | 1.57 | 2.97 | 6.96E-06  |
| LOC421584    | 1.57 | 2.97 | 3.02E-06  |
| MUC2         | 1.57 | 2.97 | 7.90E-06  |
| TOMM5        | 1.57 | 2.97 | 1.33E-07  |
| ROPN1L       | 1.57 | 2.97 | 5.54E-10  |
| RHOQ         | 1.57 | 2.97 | 4.63E-08  |
| LOC101749175 | 1.57 | 2.97 | 2.85E-08  |
| CHDH         | 1.57 | 2.97 | 3.74E-06  |
| SRRM2        | 1.57 | 2.97 | 4.90E-08  |
| TPSNRL       | 1.57 | 2.97 | 2.76E-07  |
| CAMK2N1      | 1.57 | 2.97 | 7.68E-08  |
| CNN1         | 1.57 | 2.96 | 4.14E-06  |
| RASL11A      | 1.57 | 2.96 | 5.61E-07  |
| HSBP1        | 1.57 | 2.96 | 3.97E-08  |
| GCH1         | 1.57 | 2.96 | 1.67E-08  |
| COX8A        | 1.57 | 2.96 | 2.98E-07  |
| FGF8         | 1.57 | 2.96 | 1.33E-06  |
| TAP2         | 1.56 | 2.96 | 7.09E-09  |
| PEX3         | 1.56 | 2.96 | 2.13E-06  |
| ERFE         | 1.56 | 2.96 | 3.50E-08  |
| NUB1         | 1.56 | 2.96 | 3.38E-09  |
| KIF2A        | 1.56 | 2.96 | 9.46E-09  |
| RAB10L       | 1.56 | 2.96 | 3.31E-09  |
| BCO1         | 1.56 | 2.96 | 8.23E-09  |
| BAK1         | 1.56 | 2.95 | 6.32E-09  |
| NRAP         | 1.56 | 2.95 | 0.002121  |
| RNF213       | 1.56 | 2.95 | 6.35E-09  |
| LOC101747405 | 1.56 | 2.95 | 4.64E-09  |
| RWDD4        | 1.56 | 2.95 | 8.01E-08  |
| PCBD1        | 1.56 | 2.95 | 8.37E-08  |
| TAPBP        | 1.56 | 2.95 | 6.13E-09  |
| IL6          | 1.56 | 2.95 | 2.22E-09  |
| INHBB        | 1.56 | 2.95 | 3.97E-05  |
| NT5C3B       | 1.56 | 2.95 | 9.31E-09  |
| SAMHD1       | 1.56 | 2.95 | 1.34E-07  |
| ACAD6L       | 1.56 | 2.94 | 4.57E-08  |
| SST          | 1.56 | 2.94 | 2.15E-08  |
| TRIM25       | 1.56 | 2.94 | 1.95E-10  |
| C5H11ORF96   | 1.55 | 2.94 | 4.56E-08  |
| DHX36        | 1.55 | 2.94 | 0.002047  |
| CHD7         | 1.55 | 2.93 | 9.44E-05  |
| ALB          | 1.55 | 2.93 | 6.72E-10  |
| ASB5         | 1.55 | 2.93 | 4.20E-09  |
| AVD          | 1.55 | 2.93 | 1.86E-06  |
| ATOX1        | 1.55 | 2.93 | 4.48E-09  |
| DDB2         | 1.55 | 2.93 | 0.0003182 |
| BF1          | 1.55 | 2.92 | 1.00E-08  |
| LOC101751989 | 1.55 | 2.92 | 3.72E-08  |
| DTX3         | 1.54 | 2.92 | 3.39E-11  |
| OSCP1        | 1.54 | 2.91 | 0.000458  |

|           |       |       |           |
|-----------|-------|-------|-----------|
| SCT       | 1.54  | 2.91  | 0.0003723 |
| GIMAP8L1  | 1.54  | 2.91  | 1.07E-08  |
| PPFIBP1   | 1.54  | 2.91  | 9.64E-10  |
| NDUFA1    | 1.54  | 2.91  | 3.16E-09  |
| DESI2L    | 1.54  | 2.90  | 5.45E-08  |
| YAE1D1    | 1.54  | 2.90  | 1.61E-07  |
| ATF3      | 1.53  | 2.90  | 5.70E-09  |
| MSI1      | 1.53  | 2.89  | 5.27E-06  |
| CREG2     | 1.53  | 2.88  | 8.87E-10  |
| AKAP5     | 1.53  | 2.88  | 7.51E-10  |
| GET4      | 1.53  | 2.88  | 3.25E-07  |
| LOC425214 | 1.53  | 2.88  | 2.75E-06  |
| TAP1      | 1.53  | 2.88  | 1.71E-09  |
| SRRM3     | 1.53  | 2.88  | 2.94E-07  |
| OST4      | 1.52  | 2.88  | 2.53E-09  |
| LOC415325 | 1.52  | 2.87  | 1.98E-06  |
| SELE      | 1.52  | 2.87  | 2.94E-10  |
| HIST1H2B7 | 1.52  | 2.87  | 1.91E-08  |
| ADAR      | 1.52  | 2.87  | 2.51E-11  |
| LYPLAL1   | 1.52  | 2.87  | 3.06E-08  |
| PRDM12    | 1.52  | 2.87  | 7.09E-07  |
| HBBA      | 1.52  | 2.87  | 4.18E-09  |
| LYG2      | 1.52  | 2.86  | 2.42E-07  |
| BTG4      | 1.52  | 2.86  | 2.70E-06  |
| PDGFB     | 1.52  | 2.86  | 1.74E-07  |
| PARP14L   | 1.51  | 2.86  | 1.63E-09  |
| STOML1    | 1.51  | 2.85  | 8.45E-09  |
| CRIP2     | 1.51  | 2.85  | 1.09E-10  |
| TRAFD1    | 1.51  | 2.85  | 9.66E-11  |
| MCOLN3    | 1.51  | 2.85  | 1.20E-07  |
| GLRX      | 1.51  | 2.85  | 5.59E-11  |
| ARAP2     | 1.51  | 2.85  | 1.50E-08  |
| MXI1      | 1.51  | 2.85  | 1.35E-13  |
| PCDH10    | 1.51  | 2.84  | 2.60E-07  |
| MMP7      | 1.50  | 2.84  | 9.88E-08  |
| RLN3      | 1.50  | 2.83  | 2.39E-08  |
| HOXB3     | 1.50  | 2.83  | 7.24E-11  |
| MMP23B    | 1.50  | 2.83  | 4.83E-10  |
| HBA1      | -1.84 | -3.58 | 0.0004308 |
| DNAJB4    | -1.87 | -3.64 | 0.001282  |
| PCDH9     | -1.92 | -3.80 | 0.0007569 |
| ORM1      | -1.97 | -3.91 | 0.003265  |
| SETD1B    | -1.97 | -3.92 | 0.001429  |
| RNASE4    | -1.97 | -3.92 | 0.002567  |
| CENPE     | -1.98 | -3.96 | 2.98E-07  |
| COL9A2    | -2.00 | -3.99 | 0.002746  |
| SEMA6D    | -2.00 | -3.99 | 0.001603  |
| SOX17     | -2.00 | -3.99 | 0.004248  |
| NEB       | -2.00 | -3.99 | 0.004257  |
| LOC395159 | -2.00 | -4.01 | 0.001446  |

|              |       |       |           |
|--------------|-------|-------|-----------|
| BOD1L1       | -2.02 | -4.04 | 0.002061  |
| ADH1C        | -2.04 | -4.12 | 0.003425  |
| HOMER1       | -2.04 | -4.12 | 0.003422  |
| BPTF         | -2.06 | -4.16 | 0.00494   |
| BPI          | -2.06 | -4.18 | 0.003653  |
| AGR2         | -2.07 | -4.19 | 0.004608  |
| LOC100857474 | -2.07 | -4.20 | 0.003557  |
| TSPAN8       | -2.07 | -4.20 | 0.002433  |
| EEF1A2       | -2.07 | -4.21 | 0.005265  |
| MATN4        | -2.07 | -4.21 | 0.000661  |
| COBL         | -2.08 | -4.22 | 0.005344  |
| BTAF1        | -2.08 | -4.23 | 0.0004487 |
| RASL11B      | -2.09 | -4.26 | 0.0005997 |
| KMT2A        | -2.09 | -4.26 | 0.002852  |
| FGG          | -2.09 | -4.27 | 0.005272  |
| SFTPA2       | -2.10 | -4.29 | 0.0001447 |
| CENPF        | -2.11 | -4.31 | 3.04E-07  |
| THBS4        | -2.11 | -4.31 | 0.003133  |
| CKAP5        | -2.11 | -4.32 | 4.26E-05  |
| MYOG         | -2.11 | -4.32 | 0.003348  |
| CRYAB        | -2.11 | -4.32 | 0.002166  |
| CHRD1        | -2.11 | -4.32 | 0.003447  |
| NKAIN4       | -2.11 | -4.33 | 0.00446   |
| EPCAM        | -2.12 | -4.36 | 0.0006037 |
| PALLD        | -2.12 | -4.36 | 0.003768  |
| ADAMTS1      | -2.12 | -4.36 | 0.003736  |
| ANKHD1       | -2.12 | -4.36 | 0.004954  |
| CLEC3B       | -2.13 | -4.36 | 0.001097  |
| EYA4         | -2.13 | -4.38 | 0.003781  |
| F13A1        | -2.13 | -4.38 | 0.001221  |
| FBLN5        | -2.13 | -4.38 | 0.0007031 |
| TRIP12       | -2.13 | -4.38 | 0.00475   |
| C3           | -2.13 | -4.39 | 0.003633  |
| LOC407092    | -2.13 | -4.39 | 0.005307  |
| GAS1         | -2.14 | -4.40 | 0.002587  |
| FNDC1        | -2.14 | -4.40 | 0.003225  |
| FSTL1        | -2.14 | -4.41 | 0.002604  |
| FRMD3        | -2.14 | -4.41 | 0.002219  |
| ALG12        | -2.14 | -4.42 | 0.002181  |
| KIF5B        | -2.15 | -4.42 | 0.004316  |
| HMOX1        | -2.15 | -4.44 | 0.001262  |
| ENPP3        | -2.15 | -4.45 | 0.0008295 |
| NEURL1       | -2.16 | -4.46 | 0.00329   |
| CEP55        | -2.16 | -4.47 | 0.002167  |
| RBM33        | -2.16 | -4.47 | 0.001047  |
| SORBS1       | -2.16 | -4.48 | 0.001416  |
| VEGFD        | -2.17 | -4.49 | 0.0009605 |
| MYL1         | -2.17 | -4.50 | 0.00225   |
| PLXNA4       | -2.17 | -4.50 | 0.004584  |
| CNTRL        | -2.17 | -4.50 | 9.27E-05  |



|          |       |       |           |
|----------|-------|-------|-----------|
| XIRP1    | -2.17 | -4.50 | 0.0002206 |
| AMOTL2   | -2.17 | -4.51 | 0.001319  |
| LONRF1   | -2.17 | -4.51 | 0.003702  |
| CBLB     | -2.17 | -4.51 | 0.0008274 |
| COL6A1   | -2.17 | -4.51 | 0.001607  |
| FN1      | -2.17 | -4.51 | 0.00174   |
| KAT6B    | -2.17 | -4.51 | 0.004225  |
| PDE5A    | -2.17 | -4.51 | 0.004175  |
| PPP1R13B | -2.17 | -4.52 | 0.002578  |
| RUNX1    | -2.17 | -4.52 | 0.004478  |
| NET1     | -2.18 | -4.52 | 0.002934  |
| OGN      | -2.18 | -4.52 | 0.0003321 |
| COL11A1  | -2.18 | -4.53 | 0.004254  |
| DMD      | -2.18 | -4.53 | 0.004453  |
| MYOT     | -2.18 | -4.53 | 0.0006038 |
| LRIG3    | -2.18 | -4.53 | 0.0003946 |
| KPNA1    | -2.18 | -4.54 | 0.002623  |
| CHERP    | -2.18 | -4.54 | 0.004439  |
| HSPB2    | -2.18 | -4.54 | 0.004827  |
| IL4R     | -2.19 | -4.55 | 0.003822  |
| ANKRD17  | -2.19 | -4.55 | 0.002322  |
| LATS2    | -2.19 | -4.55 | 0.0001969 |
| MRVI1    | -2.19 | -4.55 | 0.004277  |
| NFXL1    | -2.19 | -4.55 | 0.001597  |
| AP3D1    | -2.19 | -4.56 | 0.004216  |
| PLXNB2   | -2.19 | -4.56 | 0.001849  |
| THOC2    | -2.19 | -4.56 | 0.001842  |
| TACC2    | -2.19 | -4.57 | 0.004385  |
| FBN2     | -2.19 | -4.57 | 0.000205  |
| SVIL     | -2.19 | -4.57 | 0.004525  |
| DACH1    | -2.19 | -4.58 | 0.004814  |
| FAM65B   | -2.19 | -4.58 | 0.00459   |
| KDM3B    | -2.19 | -4.58 | 0.0001384 |
| TNNC2    | -2.19 | -4.58 | 0.003107  |
| VPS50    | -2.19 | -4.58 | 0.004823  |
| ATAD5    | -2.20 | -4.58 | 0.00363   |
| CDC5L    | -2.20 | -4.58 | 0.004113  |
| EML4     | -2.20 | -4.58 | 0.002051  |
| MED13L   | -2.20 | -4.59 | 0.003622  |
| RNF19A   | -2.20 | -4.59 | 0.003937  |
| ADAMTS3  | -2.20 | -4.59 | 0.004301  |
| UTRN     | -2.20 | -4.59 | 0.0006506 |
| TNMD     | -2.20 | -4.60 | 0.001018  |
| POLR3A   | -2.21 | -4.62 | 0.001785  |
| AMPD3    | -2.21 | -4.62 | 0.00454   |
| PRICKLE1 | -2.21 | -4.63 | 0.002626  |
| IFI30    | -2.21 | -4.64 | 0.005356  |
| TGFBR3   | -2.21 | -4.64 | 0.002646  |
| EVI2A    | -2.21 | -4.64 | 0.003767  |
| GSTA3    | -2.21 | -4.64 | 0.0001202 |

|              |       |       |           |
|--------------|-------|-------|-----------|
| MATN1        | -2.21 | -4.64 | 0.0002064 |
| RDH10        | -2.21 | -4.64 | 0.004171  |
| ALDH1A2      | -2.22 | -4.65 | 0.00063   |
| LOC100858295 | -2.22 | -4.65 | 0.003728  |
| UTP20        | -2.22 | -4.65 | 0.004594  |
| HERC2        | -2.22 | -4.65 | 0.00409   |
| KIDINS220    | -2.22 | -4.65 | 0.00243   |
| DUSP4        | -2.22 | -4.66 | 0.000789  |
| LARP1        | -2.22 | -4.66 | 0.001771  |
| TUBGCP3      | -2.22 | -4.66 | 0.00033   |
| RUBCNL       | -2.22 | -4.66 | 0.002615  |
| APBB2        | -2.22 | -4.67 | 0.001683  |
| MGAT4A       | -2.22 | -4.67 | 0.002194  |
| COL11A2      | -2.22 | -4.67 | 0.002278  |
| MYOF         | -2.22 | -4.67 | 0.001558  |
| TFR2         | -2.22 | -4.67 | 0.003858  |
| MED12        | -2.23 | -4.68 | 0.003474  |
| PDE8A        | -2.23 | -4.68 | 0.004973  |
| QSOX2        | -2.23 | -4.68 | 0.002551  |
| TNNI2        | -2.23 | -4.68 | 0.0003173 |
| ZMIZ1        | -2.23 | -4.68 | 0.002262  |
| EPHA3        | -2.23 | -4.68 | 0.0002704 |
| GPD2         | -2.23 | -4.68 | 0.003208  |
| SMG1         | -2.23 | -4.68 | 0.0006173 |
| UTP4         | -2.23 | -4.68 | 0.004689  |
| ADAM28       | -2.23 | -4.69 | 3.57E-05  |
| SUV39H1      | -2.23 | -4.69 | 0.002328  |
| UPF1         | -2.23 | -4.69 | 0.0005854 |
| GPR65        | -2.23 | -4.70 | 0.005355  |
| SEL1L3       | -2.23 | -4.70 | 0.001733  |
| HSD17B12     | -2.23 | -4.70 | 0.002688  |
| NOL8         | -2.23 | -4.70 | 0.0007215 |
| REXO5        | -2.23 | -4.70 | 0.004725  |
| MARCO        | -2.24 | -4.71 | 0.001637  |
| SON          | -2.24 | -4.71 | 0.0007973 |
| ECT2         | -2.24 | -4.72 | 0.00274   |
| EIF4G1       | -2.24 | -4.72 | 0.005217  |
| SOX11        | -2.24 | -4.72 | 0.0008356 |
| LCP1         | -2.24 | -4.73 | 0.0009889 |
| SLC23A2      | -2.24 | -4.73 | 0.0004006 |
| SYNPO2L      | -2.24 | -4.73 | 2.12E-05  |
| LOC423766    | -2.24 | -4.73 | 0.002712  |
| LRRC32       | -2.24 | -4.73 | 0.003541  |
| OCM2         | -2.24 | -4.73 | 1.91E-05  |
| RPN2         | -2.24 | -4.73 | 0.000234  |
| TNPO1        | -2.24 | -4.73 | 0.0001987 |
| USP47        | -2.24 | -4.73 | 0.002752  |
| MEF2C        | -2.24 | -4.74 | 0.0005948 |
| TBC1D1       | -2.24 | -4.74 | 0.005232  |
| FAP          | -2.25 | -4.74 | 0.0006876 |

|           |       |       |           |
|-----------|-------|-------|-----------|
| LOC415662 | -2.25 | -4.74 | 0.0007367 |
| SFTPA1    | -2.25 | -4.74 | 3.05E-08  |
| SHROOM2   | -2.25 | -4.74 | 0.001868  |
| TES       | -2.25 | -4.74 | 0.002933  |
| GGH       | -2.25 | -4.75 | 0.002467  |
| HMMR      | -2.25 | -4.75 | 0.003267  |
| PXYLP1    | -2.25 | -4.75 | 0.002634  |
| RBM24     | -2.25 | -4.75 | 0.0002165 |
| RBM25     | -2.25 | -4.75 | 0.004343  |
| REEP3     | -2.25 | -4.75 | 0.001572  |
| TNC       | -2.25 | -4.75 | 0.000119  |
| COL22A1   | -2.25 | -4.75 | 0.004861  |
| DHX37     | -2.25 | -4.75 | 0.000296  |
| GDPD5     | -2.25 | -4.75 | 0.001163  |
| RNF2      | -2.25 | -4.75 | 0.00221   |
| PCNX1     | -2.25 | -4.76 | 0.001673  |
| SH3PXD2A  | -2.25 | -4.76 | 0.001987  |
| SOD3      | -2.25 | -4.76 | 0.0007696 |
| KIF14     | -2.25 | -4.76 | 0.001168  |
| KNL1      | -2.25 | -4.76 | 0.002408  |
| LYPLA2    | -2.25 | -4.76 | 0.005011  |
| PLXNA2    | -2.25 | -4.76 | 0.003072  |
| VAT1L     | -2.25 | -4.76 | 0.004646  |
| ATRX      | -2.25 | -4.77 | 0.001921  |
| COL6A3    | -2.25 | -4.77 | 0.005356  |
| FAM208A   | -2.25 | -4.77 | 0.004663  |
| NMD3      | -2.25 | -4.77 | 0.004384  |
| SPI1      | -2.25 | -4.77 | 0.0004251 |
| SCAF8     | -2.26 | -4.78 | 0.003542  |
| XPO5      | -2.26 | -4.78 | 0.003552  |
| ZNF131    | -2.26 | -4.78 | 0.00437   |
| CDT1      | -2.26 | -4.78 | 0.003688  |
| CHD4      | -2.26 | -4.78 | 0.004958  |
| NF1       | -2.26 | -4.78 | 0.00234   |
| SLC25A25  | -2.26 | -4.78 | 0.003419  |
| BMPR1A    | -2.26 | -4.79 | 0.001781  |
| POLDIP2   | -2.26 | -4.79 | 0.00228   |
| SDC3      | -2.26 | -4.79 | 0.0001455 |
| TRIO      | -2.26 | -4.79 | 0.004155  |
| CDC14B    | -2.26 | -4.79 | 0.002747  |
| CRISPLD1  | -2.26 | -4.79 | 0.004613  |
| CUL1      | -2.26 | -4.79 | 0.003937  |
| LOC422171 | -2.26 | -4.79 | 0.001587  |
| RTN4      | -2.26 | -4.79 | 0.0007836 |
| ARHGAP24  | -2.26 | -4.80 | 0.0007332 |
| CNOT6L    | -2.26 | -4.80 | 0.0006458 |
| CPT1A     | -2.26 | -4.80 | 0.002662  |
| ROBO2     | -2.26 | -4.80 | 0.002971  |
| USP42     | -2.26 | -4.80 | 0.001468  |
| C9H2ORF82 | -2.26 | -4.80 | 0.00273   |

|          |       |       |           |
|----------|-------|-------|-----------|
| DDX52    | -2.26 | -4.80 | 0.005017  |
| ITGB2    | -2.26 | -4.80 | 0.0007835 |
| SLC29A1  | -2.26 | -4.80 | 0.00172   |
| IFITM5   | -2.27 | -4.81 | 3.02E-05  |
| PKN1     | -2.27 | -4.81 | 0.00254   |
| PTPN6    | -2.27 | -4.81 | 0.001074  |
| PTPRM    | -2.27 | -4.81 | 0.004713  |
| NPTX2    | -2.27 | -4.81 | 0.002864  |
| GIN51    | -2.27 | -4.82 | 0.002974  |
| ZMYND11  | -2.27 | -4.82 | 0.001301  |
| CHM      | -2.27 | -4.82 | 0.001071  |
| FOCAD    | -2.27 | -4.82 | 0.003576  |
| CDK17    | -2.27 | -4.83 | 0.00532   |
| DYM      | -2.27 | -4.83 | 0.001353  |
| EPHB2    | -2.27 | -4.83 | 0.005388  |
| GLB1     | -2.27 | -4.83 | 0.002761  |
| SLC25A30 | -2.27 | -4.83 | 0.004649  |
| ABHD2    | -2.27 | -4.84 | 0.00512   |
| GOLGA2   | -2.27 | -4.84 | 0.00211   |
| PRPF39   | -2.27 | -4.84 | 0.005298  |
| CHD9     | -2.28 | -4.84 | 0.002623  |
| KIAA0430 | -2.28 | -4.84 | 0.0009557 |
| LRCH4    | -2.28 | -4.84 | 0.004296  |
| PLA2G4A  | -2.28 | -4.84 | 0.005212  |
| FAM168B  | -2.28 | -4.85 | 0.002279  |
| POLR1A   | -2.28 | -4.85 | 0.001284  |
| PTH1R    | -2.28 | -4.85 | 0.0024    |
| CA2      | -2.28 | -4.85 | 0.00159   |
| CHRNA1   | -2.28 | -4.85 | 0.001157  |
| FLRT3    | -2.28 | -4.85 | 0.001618  |
| KIAA1107 | -2.28 | -4.85 | 0.001197  |
| NAV3     | -2.28 | -4.85 | 0.002277  |
| SENP6    | -2.28 | -4.85 | 0.004398  |
| APLP2    | -2.28 | -4.86 | 0.0002139 |
| CEP170   | -2.28 | -4.86 | 0.0005303 |
| ID2      | -2.28 | -4.86 | 0.003469  |
| MAP2K3   | -2.28 | -4.86 | 0.002142  |
| RPAP1    | -2.28 | -4.86 | 0.002559  |
| ZFX4     | -2.28 | -4.86 | 0.0009711 |
| CPEB1    | -2.28 | -4.86 | 0.001433  |
| HSPG2    | -2.28 | -4.86 | 0.001057  |
| PHIP     | -2.28 | -4.86 | 0.002404  |
| SHROOM1  | -2.28 | -4.86 | 0.0009464 |
| SPEN     | -2.28 | -4.86 | 0.002699  |
| COL2A1   | -2.28 | -4.87 | 5.02E-05  |
| DDX24    | -2.28 | -4.87 | 0.001411  |
| EMB      | -2.28 | -4.87 | 0.002863  |
| NRK      | -2.28 | -4.87 | 0.00188   |
| SLC2A14  | -2.28 | -4.87 | 0.003653  |
| WIPF1    | -2.28 | -4.87 | 0.0002211 |

|              |       |       |           |
|--------------|-------|-------|-----------|
| AARS         | -2.28 | -4.87 | 0.005374  |
| CAVIN4       | -2.28 | -4.87 | 0.0008137 |
| DKK1         | -2.28 | -4.87 | 6.11E-05  |
| GNPTAB       | -2.28 | -4.87 | 0.005196  |
| IGF2BP3      | -2.28 | -4.87 | 0.004143  |
| ITGAV        | -2.28 | -4.87 | 0.001956  |
| LOC100859072 | -2.28 | -4.87 | 0.003478  |
| TUBB         | -2.28 | -4.87 | 0.0003815 |
| FOXP2        | -2.29 | -4.88 | 0.002465  |
| HAPLN1       | -2.29 | -4.88 | 0.0003638 |
| LOX          | -2.29 | -4.88 | 0.0002131 |
| MYCBP2       | -2.29 | -4.88 | 0.001529  |
| MYH1B        | -2.29 | -4.88 | 0.001182  |
| PRR5L        | -2.29 | -4.88 | 0.003251  |
| WWC2         | -2.29 | -4.88 | 0.004992  |
| CTDSPL2      | -2.29 | -4.88 | 0.004261  |
| EGR1         | -2.29 | -4.88 | 0.0004616 |
| KIAA0355     | -2.29 | -4.88 | 0.0001604 |
| METTL13      | -2.29 | -4.88 | 0.003113  |
| SLC7A3       | -2.29 | -4.88 | 0.0002882 |
| CEP89        | -2.29 | -4.89 | 0.001483  |
| DHX8         | -2.29 | -4.89 | 0.001763  |
| DTL          | -2.29 | -4.89 | 0.002243  |
| MAP3K1       | -2.29 | -4.89 | 0.00257   |
| RASGEF1B     | -2.29 | -4.89 | 0.0005998 |
| SEC31A       | -2.29 | -4.89 | 0.005093  |
| CASP8AP2     | -2.29 | -4.89 | 0.004822  |
| DDR2         | -2.29 | -4.89 | 0.0008438 |
| ERBIN        | -2.29 | -4.89 | 0.004549  |
| FAM105A      | -2.29 | -4.89 | 0.003845  |
| HMG20A       | -2.29 | -4.89 | 0.0009836 |
| LATS1        | -2.29 | -4.89 | 0.003799  |
| TMEM131      | -2.29 | -4.89 | 0.00315   |
| GOLGB1       | -2.29 | -4.90 | 0.0007749 |
| MT4L         | -2.29 | -4.90 | 0.001059  |
| PUM1         | -2.29 | -4.90 | 0.0005075 |
| SULF1        | -2.29 | -4.90 | 0.0002089 |
| TSHZ1        | -2.29 | -4.90 | 0.001547  |
| TTYH2        | -2.29 | -4.90 | 0.0005698 |
| ADAM12       | -2.29 | -4.90 | 0.0004477 |
| AGAP1        | -2.29 | -4.90 | 0.004615  |
| ANKRD1       | -2.29 | -4.90 | 0.0005512 |
| COL1A2       | -2.29 | -4.90 | 0.0002832 |
| SLC10A7      | -2.29 | -4.90 | 0.002077  |
| TOMM34       | -2.29 | -4.90 | 0.004006  |
| FECH         | -2.30 | -4.91 | 0.003314  |
| LOC416530    | -2.30 | -4.91 | 0.001903  |
| RAI14        | -2.30 | -4.91 | 0.000127  |
| TOB2         | -2.30 | -4.91 | 0.001859  |
| USP24        | -2.30 | -4.91 | 0.00115   |

|              |       |       |           |
|--------------|-------|-------|-----------|
| DDX54        | -2.30 | -4.92 | 0.004781  |
| EML1         | -2.30 | -4.92 | 0.004644  |
| ZNF106       | -2.30 | -4.92 | 0.005078  |
| BBOX1        | -2.30 | -4.92 | 0.003464  |
| KIAA1551     | -2.30 | -4.92 | 0.005112  |
| TOX3         | -2.30 | -4.92 | 0.0003727 |
| ATP13A3      | -2.30 | -4.93 | 0.004241  |
| DMXL2        | -2.30 | -4.93 | 0.002061  |
| KMT2C        | -2.30 | -4.93 | 0.0008145 |
| LPCAT2       | -2.30 | -4.93 | 0.002668  |
| OSBPL1A      | -2.30 | -4.93 | 0.002437  |
| LOC100857946 | -2.30 | -4.93 | 0.0008188 |
| SLC22A23     | -2.30 | -4.93 | 0.002566  |
| TGFBRAP1     | -2.30 | -4.93 | 0.003467  |
| YAP1         | -2.30 | -4.93 | 0.00137   |
| ZNF423       | -2.30 | -4.93 | 0.003403  |
| ANKRD52      | -2.30 | -4.94 | 0.00163   |
| ARHGEF1      | -2.30 | -4.94 | 0.0004275 |
| CAMSAP3      | -2.30 | -4.94 | 0.004003  |
| DIO2         | -2.30 | -4.94 | 0.001026  |
| FBLN1        | -2.30 | -4.94 | 0.002632  |
| INO80        | -2.30 | -4.94 | 0.002696  |
| LOC424111    | -2.30 | -4.94 | 0.002046  |
| MYH11        | -2.30 | -4.94 | 0.003123  |
| NFIA         | -2.30 | -4.94 | 0.002769  |
| STARD13      | -2.30 | -4.94 | 0.003468  |
| FAT3         | -2.31 | -4.94 | 0.001737  |
| LOC101748723 | -2.31 | -4.94 | 0.0007245 |
| PCDH11X      | -2.31 | -4.94 | 0.0001888 |
| PROSER2      | -2.31 | -4.94 | 0.001492  |
| TNRC6B       | -2.31 | -4.94 | 0.005129  |
| ZCCHC6       | -2.31 | -4.94 | 0.003895  |
| ZFRL1        | -2.31 | -4.94 | 0.003413  |
| ACLY         | -2.31 | -4.95 | 0.0003127 |
| AKAP9        | -2.31 | -4.95 | 0.00197   |
| AP2B1        | -2.31 | -4.95 | 0.001612  |
| CNOT1        | -2.31 | -4.95 | 0.004608  |
| EIF4ENIF1    | -2.31 | -4.95 | 0.001591  |
| FAT4         | -2.31 | -4.95 | 0.001566  |
| LOC101752174 | -2.31 | -4.95 | 0.0008169 |
| PLXNA1       | -2.31 | -4.95 | 0.00137   |
| ST5          | -2.31 | -4.95 | 0.0007943 |
| UBR4         | -2.31 | -4.95 | 0.002205  |
| ARHGAP29     | -2.31 | -4.95 | 0.0002155 |
| EIF3A        | -2.31 | -4.95 | 0.0006651 |
| SERPINF1     | -2.31 | -4.95 | 0.004167  |
| TPP2         | -2.31 | -4.95 | 0.0006029 |
| FLRT2        | -2.31 | -4.96 | 0.002317  |
| KPNA3        | -2.31 | -4.96 | 0.003588  |
| MTCL1        | -2.31 | -4.96 | 0.0006586 |

|          |       |       |           |
|----------|-------|-------|-----------|
| UNG      | -2.31 | -4.96 | 0.004183  |
| VPS13A   | -2.31 | -4.96 | 0.002659  |
| ZFC3H1   | -2.31 | -4.96 | 0.001554  |
| BRWD1    | -2.31 | -4.96 | 0.001391  |
| CACNA2D1 | -2.31 | -4.96 | 0.0008971 |
| RNPS1    | -2.31 | -4.96 | 0.003647  |
| SREBF2   | -2.31 | -4.96 | 0.00246   |
| CASQ2    | -2.31 | -4.97 | 0.0004805 |
| KDM5B    | -2.31 | -4.97 | 0.002173  |
| RBM10    | -2.31 | -4.97 | 1.93E-05  |
| SVEP1    | -2.31 | -4.97 | 0.0003884 |
| TJP1     | -2.31 | -4.97 | 0.002916  |
| ANLN     | -2.31 | -4.98 | 0.002913  |
| BHMT     | -2.31 | -4.98 | 0.0001637 |
| FBN1     | -2.31 | -4.98 | 0.001334  |
| ZBTB41   | -2.31 | -4.98 | 0.003916  |
| ZMYM4    | -2.31 | -4.98 | 0.0003696 |
| ZNF507   | -2.31 | -4.98 | 0.00197   |
| CELF1    | -2.32 | -4.98 | 0.0005871 |
| PIEZO2   | -2.32 | -4.98 | 0.002018  |
| TNNT3    | -2.32 | -4.98 | 7.40E-05  |
| DIP2B    | -2.32 | -4.99 | 0.00382   |
| EFR3A    | -2.32 | -4.99 | 0.003002  |
| FAT1     | -2.32 | -4.99 | 0.001082  |
| KCNQ1    | -2.32 | -4.99 | 0.003919  |
| MED16    | -2.32 | -4.99 | 0.004779  |
| NCAM1    | -2.32 | -4.99 | 0.0003641 |
| OSBPL8   | -2.32 | -4.99 | 0.003003  |
| PLA2G10  | -2.32 | -4.99 | 0.001131  |
| ZBTB49   | -2.32 | -4.99 | 0.004986  |
| CRTC1    | -2.32 | -4.99 | 0.002076  |
| KANSL1L  | -2.32 | -4.99 | 0.0006747 |
| KIAA1217 | -2.32 | -4.99 | 0.001718  |
| LHX8     | -2.32 | -4.99 | 0.001008  |
| PICALM   | -2.32 | -4.99 | 0.003575  |
| THBS2    | -2.32 | -4.99 | 1.23E-05  |
| TSEN54   | -2.32 | -4.99 | 0.002708  |
| ZSWIM8   | -2.32 | -4.99 | 0.004986  |
| FANCB    | -2.32 | -5.00 | 0.001617  |
| GAPVD1   | -2.32 | -5.00 | 0.003257  |
| MCM10    | -2.32 | -5.00 | 0.0001742 |
| NEK1     | -2.32 | -5.00 | 0.002139  |
| PIIP5K2  | -2.32 | -5.00 | 0.00203   |
| SLC6A6   | -2.32 | -5.00 | 0.003452  |
| TICRR    | -2.32 | -5.00 | 7.05E-05  |
| TLL1     | -2.32 | -5.00 | 0.00164   |
| TMEM132C | -2.32 | -5.00 | 0.00185   |
| WDFY4    | -2.32 | -5.00 | 0.00438   |
| DDX21    | -2.32 | -5.00 | 0.004407  |
| IFT88    | -2.32 | -5.00 | 0.001825  |

|          |       |       |           |
|----------|-------|-------|-----------|
| RBM27    | -2.32 | -5.00 | 0.0003824 |
| SRSF7    | -2.32 | -5.00 | 0.001278  |
| ZMYM2    | -2.32 | -5.00 | 0.002218  |
| DOP1A    | -2.32 | -5.01 | 0.002774  |
| PLCB1    | -2.32 | -5.01 | 0.0002952 |
| SNRNP200 | -2.32 | -5.01 | 0.0003717 |
| TENM3    | -2.32 | -5.01 | 0.003817  |
| UTP6     | -2.32 | -5.01 | 0.002528  |
| ZNF148   | -2.32 | -5.01 | 0.0006291 |
| EMC1     | -2.33 | -5.01 | 0.0004942 |
| EPHA2    | -2.33 | -5.01 | 6.41E-05  |
| LIN54    | -2.33 | -5.01 | 0.002372  |
| MAP1B    | -2.33 | -5.01 | 0.0002457 |
| MARS     | -2.33 | -5.01 | 0.001872  |
| RIN2     | -2.33 | -5.01 | 0.0003192 |
| DGKD     | -2.33 | -5.02 | 0.001473  |
| MYH1E    | -2.33 | -5.02 | 0.0005231 |
| SLC47A1  | -2.33 | -5.02 | 0.001069  |
| WDR89    | -2.33 | -5.02 | 0.001542  |
| ABCB6    | -2.33 | -5.03 | 0.002799  |
| CDYL     | -2.33 | -5.03 | 0.003415  |
| COL24A1  | -2.33 | -5.03 | 1.95E-05  |
| DDAH1    | -2.33 | -5.03 | 0.005043  |
| NUDT4    | -2.33 | -5.03 | 0.001173  |
| PDLIM5   | -2.33 | -5.03 | 0.0004561 |
| SHQ1     | -2.33 | -5.03 | 0.0004154 |
| STAC     | -2.33 | -5.03 | 0.0002506 |
| TBC1D4   | -2.33 | -5.03 | 0.003936  |
| NSD1     | -2.33 | -5.03 | 0.004431  |
| RIOK3    | -2.33 | -5.03 | 0.00225   |
| SLC27A4  | -2.33 | -5.03 | 0.002511  |
| SRBD1    | -2.33 | -5.03 | 0.001642  |
| ST8SIA6  | -2.33 | -5.03 | 0.001477  |
| BAZ2B    | -2.33 | -5.04 | 0.0007696 |
| CBL      | -2.33 | -5.04 | 0.005205  |
| CP       | -2.33 | -5.04 | 1.53E-05  |
| MKL1     | -2.33 | -5.04 | 0.003188  |
| PARD3B   | -2.33 | -5.04 | 0.005266  |
| PRG4     | -2.33 | -5.04 | 0.0007475 |
| SPECC1L  | -2.33 | -5.04 | 0.004704  |
| ZBTB38   | -2.33 | -5.04 | 0.001269  |
| FAM210B  | -2.33 | -5.04 | 0.003247  |
| APPL1    | -2.34 | -5.05 | 0.001523  |
| BRCA1    | -2.34 | -5.05 | 0.000101  |
| HNRNPM   | -2.34 | -5.05 | 0.0002865 |
| MAP7D3   | -2.34 | -5.05 | 0.0003956 |
| PAICS    | -2.34 | -5.05 | 0.002761  |
| PBRM1    | -2.34 | -5.05 | 0.002158  |
| PRRC2C   | -2.34 | -5.05 | 0.0001192 |
| SBNO1    | -2.34 | -5.05 | 0.004017  |



|          |       |       |           |
|----------|-------|-------|-----------|
| SEC61A2  | -2.34 | -5.05 | 0.0007504 |
| SNTB1    | -2.34 | -5.05 | 0.000698  |
| ZBTB11   | -2.34 | -5.05 | 0.0002373 |
| ACTR3B   | -2.34 | -5.05 | 0.003654  |
| CPZ      | -2.34 | -5.05 | 0.000742  |
| ITGBL1   | -2.34 | -5.05 | 0.0001742 |
| KDM5A    | -2.34 | -5.05 | 0.001141  |
| NUP153   | -2.34 | -5.05 | 0.0003332 |
| SPRY1    | -2.34 | -5.05 | 0.0003033 |
| AKAP13   | -2.34 | -5.06 | 0.005288  |
| DCAF13   | -2.34 | -5.06 | 0.003938  |
| PRPF40A  | -2.34 | -5.06 | 0.0003665 |
| RECK     | -2.34 | -5.06 | 0.001845  |
| BCL11A   | -2.34 | -5.07 | 0.0005702 |
| DAAM2    | -2.34 | -5.07 | 0.0008936 |
| KDM6A    | -2.34 | -5.07 | 0.003286  |
| MPHOSPH9 | -2.34 | -5.07 | 0.004653  |
| SPAG9    | -2.34 | -5.07 | 0.001038  |
| ST8SIA5  | -2.34 | -5.07 | 0.004478  |
| VPS39    | -2.34 | -5.07 | 0.004517  |
| XRN1     | -2.34 | -5.07 | 0.0001246 |
| ADCY5    | -2.34 | -5.07 | 0.004555  |
| MED23    | -2.34 | -5.07 | 0.001228  |
| RELN     | -2.34 | -5.07 | 0.0001054 |
| SLBP     | -2.34 | -5.07 | 0.0002398 |
| ABCC1    | -2.34 | -5.08 | 0.000425  |
| ETNK1    | -2.34 | -5.08 | 0.002877  |
| MTM1     | -2.34 | -5.08 | 0.001841  |
| ZNF462   | -2.34 | -5.08 | 0.003873  |
| CSRNP1   | -2.35 | -5.08 | 0.002161  |
| CTSD     | -2.35 | -5.08 | 0.0001819 |
| FSCN1    | -2.35 | -5.08 | 0.0007055 |
| MAP1A    | -2.35 | -5.08 | 0.0002701 |
| PCDH7    | -2.35 | -5.08 | 0.0002139 |
| SLC25A29 | -2.35 | -5.08 | 0.005206  |
| ACOT2L   | -2.35 | -5.09 | 0.001151  |
| AOAH     | -2.35 | -5.09 | 0.004385  |
| CCDC102A | -2.35 | -5.09 | 0.003527  |
| MTBP     | -2.35 | -5.09 | 0.002054  |
| PAPD7    | -2.35 | -5.09 | 0.001755  |
| PDE10A   | -2.35 | -5.09 | 0.003192  |
| PDE4DIP  | -2.35 | -5.09 | 0.002071  |
| UACA     | -2.35 | -5.09 | 0.0006379 |
| ZFX      | -2.35 | -5.09 | 0.0003363 |
| ALS2     | -2.35 | -5.09 | 0.004744  |
| MDN1     | -2.35 | -5.09 | 0.0004074 |
| MICAL3   | -2.35 | -5.09 | 0.002824  |
| PDXP     | -2.35 | -5.09 | 0.001044  |
| ADGRA3   | -2.35 | -5.10 | 0.00138   |
| APBB1IP  | -2.35 | -5.10 | 0.004208  |

|              |       |       |           |
|--------------|-------|-------|-----------|
| ATF6B        | -2.35 | -5.10 | 0.002861  |
| BIN1         | -2.35 | -5.10 | 0.000951  |
| CDC42BPA     | -2.35 | -5.10 | 0.001629  |
| IPP          | -2.35 | -5.10 | 0.003606  |
| MYO9B        | -2.35 | -5.10 | 4.44E-05  |
| RBSN         | -2.35 | -5.10 | 0.0007511 |
| SPSB2        | -2.35 | -5.10 | 0.004537  |
| WTIP         | -2.35 | -5.10 | 0.0009919 |
| COL12A1      | -2.35 | -5.11 | 0.005223  |
| DCAF1        | -2.35 | -5.11 | 0.0007061 |
| GPR68        | -2.35 | -5.11 | 0.0001809 |
| LOC100859715 | -2.35 | -5.11 | 1.10E-07  |
| TMEM47       | -2.35 | -5.11 | 0.004254  |
| TPM1         | -2.35 | -5.11 | 0.005022  |
| UVSSA        | -2.35 | -5.11 | 0.004177  |
| ADAMTS5      | -2.35 | -5.11 | 0.0007624 |
| ERCC6L2      | -2.35 | -5.11 | 0.0009666 |
| HSF2         | -2.35 | -5.11 | 0.0008542 |
| INO80D       | -2.35 | -5.11 | 0.004723  |
| NOL6         | -2.35 | -5.11 | 0.001325  |
| CCSER2       | -2.36 | -5.12 | 0.001157  |
| TAC1         | -2.36 | -5.12 | 0.0004886 |
| TRPM7        | -2.36 | -5.12 | 0.0006089 |
| CMTM4        | -2.36 | -5.12 | 7.15E-05  |
| E2F7         | -2.36 | -5.12 | 0.0009417 |
| TSHZ2        | -2.36 | -5.12 | 0.002654  |
| SEC24D       | -2.36 | -5.13 | 0.0003356 |
| USP37        | -2.36 | -5.13 | 0.0004583 |
| ARMC4        | -2.36 | -5.13 | 0.001283  |
| CCDC88A      | -2.36 | -5.13 | 0.0005387 |
| CCT3         | -2.36 | -5.13 | 0.003826  |
| CDC7         | -2.36 | -5.13 | 0.003621  |
| CDH6         | -2.36 | -5.13 | 0.005032  |
| DNA2         | -2.36 | -5.13 | 0.0006865 |
| KIF20B       | -2.36 | -5.13 | 0.0001032 |
| TRAPPC11     | -2.36 | -5.13 | 0.002345  |
| UAP1         | -2.36 | -5.13 | 0.004381  |
| ACTN2        | -2.36 | -5.14 | 6.59E-08  |
| ALDH1L2      | -2.36 | -5.14 | 0.005014  |
| BIRC6        | -2.36 | -5.14 | 0.0001404 |
| HECTD4       | -2.36 | -5.14 | 0.0001679 |
| IDE          | -2.36 | -5.14 | 0.0001804 |
| KCNJ2        | -2.36 | -5.14 | 0.001383  |
| MCM6         | -2.36 | -5.14 | 0.003058  |
| PWP1         | -2.36 | -5.14 | 0.00348   |
| ATXN3        | -2.36 | -5.15 | 0.004911  |
| COL15A1      | -2.36 | -5.15 | 0.002063  |
| CRKL         | -2.36 | -5.15 | 0.00119   |
| CTDP1        | -2.36 | -5.15 | 0.0003101 |
| EP400        | -2.36 | -5.15 | 0.001024  |

|           |       |       |           |
|-----------|-------|-------|-----------|
| FBXO39    | -2.36 | -5.15 | 0.00189   |
| ITGA8     | -2.36 | -5.15 | 0.0002571 |
| MYO10L    | -2.36 | -5.15 | 0.0006604 |
| NCDN      | -2.36 | -5.15 | 0.0005336 |
| PPM1K     | -2.36 | -5.15 | 0.0002811 |
| SMPD3     | -2.36 | -5.15 | 0.0006883 |
| SPON1     | -2.36 | -5.15 | 0.000625  |
| TMEM186   | -2.36 | -5.15 | 0.002879  |
| ZGRF1     | -2.36 | -5.15 | 0.002381  |
| ANKLE2    | -2.37 | -5.15 | 0.001439  |
| ATP2B2    | -2.37 | -5.15 | 0.0008299 |
| DDX28     | -2.37 | -5.15 | 0.002202  |
| MSTO1     | -2.37 | -5.15 | 0.001836  |
| NT5DC3    | -2.37 | -5.15 | 0.002468  |
| VWA8      | -2.37 | -5.15 | 0.002569  |
| CCNE1     | -2.37 | -5.16 | 0.00369   |
| CSE1L     | -2.37 | -5.16 | 0.004539  |
| RASA3     | -2.37 | -5.16 | 0.0001066 |
| SMARCA4   | -2.37 | -5.16 | 0.0005815 |
| EFTUD2    | -2.37 | -5.16 | 0.002507  |
| FAM110B   | -2.37 | -5.16 | 0.003166  |
| LOC776067 | -2.37 | -5.16 | 0.001206  |
| PAG1      | -2.37 | -5.16 | 0.000503  |
| CTNNA1    | -2.37 | -5.17 | 0.001392  |
| DNER      | -2.37 | -5.17 | 0.0003954 |
| KRT7      | -2.37 | -5.17 | 0.003984  |
| LRRC58    | -2.37 | -5.17 | 0.001211  |
| DDX20     | -2.37 | -5.18 | 0.003823  |
| MAN1A2    | -2.37 | -5.18 | 0.003696  |
| MEGF6L    | -2.37 | -5.18 | 7.48E-05  |
| NOTCH2    | -2.37 | -5.18 | 0.0004662 |
| TRAPPC8   | -2.37 | -5.18 | 0.0005127 |
| FGFR2     | -2.37 | -5.18 | 1.12E-05  |
| GOPC      | -2.37 | -5.18 | 0.003698  |
| LOC396224 | -2.37 | -5.18 | 0.004918  |
| PTPRR     | -2.37 | -5.18 | 0.004903  |
| TOPORS    | -2.37 | -5.18 | 0.002171  |
| CLIP1     | -2.38 | -5.19 | 0.001881  |
| CNKS3     | -2.38 | -5.19 | 8.33E-05  |
| LRRC8C    | -2.38 | -5.19 | 0.002532  |
| NEMF      | -2.38 | -5.19 | 0.002713  |
| NID1      | -2.38 | -5.19 | 0.0006569 |
| RAPH1     | -2.38 | -5.19 | 0.0002753 |
| RBMS3     | -2.38 | -5.19 | 0.0002487 |
| DKC1      | -2.38 | -5.19 | 0.0007205 |
| ITGB1     | -2.38 | -5.19 | 0.003391  |
| PPP6R3    | -2.38 | -5.19 | 0.0004021 |
| TOGARAM1  | -2.38 | -5.19 | 0.002337  |
| ALCAM     | -2.38 | -5.20 | 0.001259  |
| CASK      | -2.38 | -5.20 | 0.0002491 |

|           |       |       |           |
|-----------|-------|-------|-----------|
| CENPU     | -2.38 | -5.20 | 0.00446   |
| EDN2      | -2.38 | -5.20 | 1.10E-06  |
| GOLGA4    | -2.38 | -5.20 | 0.001438  |
| KPNA5     | -2.38 | -5.20 | 0.003613  |
| LTA4H     | -2.38 | -5.20 | 0.00162   |
| STN1      | -2.38 | -5.20 | 0.004546  |
| ZDHHC17   | -2.38 | -5.20 | 0.002031  |
| AMFR      | -2.38 | -5.21 | 0.003322  |
| ATG16L1   | -2.38 | -5.21 | 0.00204   |
| CBX8      | -2.38 | -5.21 | 0.003279  |
| DHX57     | -2.38 | -5.21 | 0.003064  |
| THOP1     | -2.38 | -5.21 | 0.0007305 |
| AGGF1     | -2.38 | -5.21 | 0.003326  |
| ANKRD46   | -2.38 | -5.21 | 0.002367  |
| GSC       | -2.38 | -5.21 | 4.60E-05  |
| KRT14     | -2.38 | -5.21 | 0.000183  |
| PPM1E     | -2.38 | -5.21 | 0.002511  |
| BRD1      | -2.38 | -5.22 | 0.0005572 |
| DDX11     | -2.38 | -5.22 | 0.0006809 |
| DPYD      | -2.38 | -5.22 | 0.003001  |
| EIF5B     | -2.38 | -5.22 | 0.002588  |
| FAM199X   | -2.38 | -5.22 | 0.002262  |
| HIP1R     | -2.38 | -5.22 | 0.00241   |
| IPO9      | -2.38 | -5.22 | 0.002154  |
| ADCY2     | -2.39 | -5.22 | 0.0003138 |
| B4GALT6   | -2.39 | -5.22 | 0.001458  |
| ELMO1     | -2.39 | -5.22 | 0.002236  |
| FBN3      | -2.39 | -5.22 | 4.44E-06  |
| FLII      | -2.39 | -5.22 | 0.003314  |
| GULP1     | -2.39 | -5.22 | 9.52E-05  |
| KCNAB3    | -2.39 | -5.22 | 0.004669  |
| KDM1A     | -2.39 | -5.22 | 0.001538  |
| LOC415456 | -2.39 | -5.22 | 0.000629  |
| NOP2      | -2.39 | -5.22 | 0.002773  |
| PPP4R1    | -2.39 | -5.22 | 0.001171  |
| SEC23A    | -2.39 | -5.22 | 0.001907  |
| C2CD5     | -2.39 | -5.23 | 0.000182  |
| KHDRBS1   | -2.39 | -5.23 | 0.0008686 |
| VPS36     | -2.39 | -5.23 | 0.0007096 |
| CREB3L2   | -2.39 | -5.24 | 0.002838  |
| SLC39A6   | -2.39 | -5.24 | 0.0008055 |
| TUBA1A    | -2.39 | -5.24 | 0.002127  |
| ZMYND8    | -2.39 | -5.24 | 0.0004552 |
| CAMTA2    | -2.39 | -5.24 | 0.00139   |
| COL14A1   | -2.39 | -5.24 | 0.004282  |
| G3BP1     | -2.39 | -5.24 | 0.0004905 |
| HBS1L     | -2.39 | -5.24 | 0.0003932 |
| LPP       | -2.39 | -5.24 | 3.66E-05  |
| SART3     | -2.39 | -5.24 | 0.0001456 |
| TARSL2    | -2.39 | -5.24 | 0.0001897 |

|             |       |       |           |
|-------------|-------|-------|-----------|
| CWF19L2     | -2.39 | -5.25 | 0.001377  |
| GPAM        | -2.39 | -5.25 | 0.0007673 |
| HDAC4       | -2.39 | -5.25 | 0.0002457 |
| NOC2L       | -2.39 | -5.25 | 0.001551  |
| RABGAP1L    | -2.39 | -5.25 | 0.004073  |
| ZC3H7A      | -2.39 | -5.25 | 0.001184  |
| ATXN2       | -2.39 | -5.25 | 0.0008526 |
| NCKAP1      | -2.39 | -5.25 | 0.003041  |
| POLA1       | -2.39 | -5.25 | 0.0001496 |
| RASA2       | -2.39 | -5.26 | 0.0002484 |
| TMEM214     | -2.39 | -5.26 | 0.001222  |
| TRPS1       | -2.39 | -5.26 | 0.0005249 |
| ALDH9A1     | -2.40 | -5.27 | 0.001453  |
| ARID4A      | -2.40 | -5.27 | 0.002037  |
| ATP1B1      | -2.40 | -5.27 | 0.004737  |
| C4H20ORF194 | -2.40 | -5.27 | 0.001007  |
| CACFD1      | -2.40 | -5.27 | 0.003596  |
| ERCC6L      | -2.40 | -5.27 | 0.0001013 |
| KCTD10      | -2.40 | -5.27 | 0.002602  |
| LARP6       | -2.40 | -5.27 | 0.00352   |
| LRP5        | -2.40 | -5.27 | 0.00103   |
| NCKIPSD     | -2.40 | -5.27 | 0.001546  |
| NOLC1       | -2.40 | -5.27 | 0.0001794 |
| RAB3IP      | -2.40 | -5.27 | 1.29E-05  |
| ATP11B      | -2.40 | -5.27 | 0.0001979 |
| CDC73       | -2.40 | -5.27 | 0.0003281 |
| CFI         | -2.40 | -5.27 | 0.003244  |
| MMS19       | -2.40 | -5.27 | 0.0001655 |
| NTF3        | -2.40 | -5.27 | 0.0005903 |
| LMINA       | -2.40 | -5.28 | 0.003985  |
| LOC427439   | -2.40 | -5.28 | 0.0004221 |
| MTMR6       | -2.40 | -5.28 | 9.07E-05  |
| NLE1        | -2.40 | -5.28 | 0.0002135 |
| POM121      | -2.40 | -5.28 | 0.001035  |
| TBC1D2B     | -2.40 | -5.28 | 0.00138   |
| BMS1        | -2.40 | -5.28 | 0.0001301 |
| CEP192      | -2.40 | -5.28 | 0.0001859 |
| DOCK6       | -2.40 | -5.28 | 0.0001012 |
| FBXO25      | -2.40 | -5.28 | 0.00537   |
| LOC415641   | -2.40 | -5.28 | 0.0008739 |
| P4HB        | -2.40 | -5.28 | 1.75E-05  |
| RETSAT      | -2.40 | -5.28 | 0.001973  |
| TCERG1      | -2.40 | -5.28 | 0.003313  |
| LDHA        | -2.40 | -5.29 | 0.004012  |
| LMO1        | -2.40 | -5.29 | 0.001037  |
| MTO1        | -2.40 | -5.29 | 0.003523  |
| MXRA5       | -2.40 | -5.29 | 0.0004827 |
| RAD18       | -2.40 | -5.29 | 0.001948  |
| RPS6KA5     | -2.40 | -5.29 | 0.003169  |
| SRGAP1      | -2.40 | -5.29 | 0.0002355 |

|         |       |       |           |
|---------|-------|-------|-----------|
| STIL    | -2.40 | -5.29 | 0.0001887 |
| TMEM209 | -2.40 | -5.29 | 0.0003902 |
| CEP120  | -2.40 | -5.30 | 0.0001783 |
| CXCR4   | -2.40 | -5.30 | 0.0002451 |
| MAPK1   | -2.40 | -5.30 | 0.002711  |
| PIGU    | -2.40 | -5.30 | 0.002603  |
| RAPGEF2 | -2.40 | -5.30 | 0.0002061 |
| SIPA1L2 | -2.40 | -5.30 | 0.00226   |
| SPOPL   | -2.40 | -5.30 | 0.000425  |
| SPTBN1  | -2.40 | -5.30 | 0.0002436 |
| SYNE1   | -2.40 | -5.30 | 9.63E-05  |
| TRIB2   | -2.40 | -5.30 | 0.0007247 |
| ARNT2   | -2.41 | -5.30 | 0.004428  |
| GNA11   | -2.41 | -5.30 | 0.0003386 |
| HOXA9   | -2.41 | -5.30 | 0.0005334 |
| MATR3   | -2.41 | -5.30 | 0.003631  |
| NAA25   | -2.41 | -5.30 | 0.0005799 |
| SNAI1   | -2.41 | -5.30 | 0.001067  |
| TOP3B   | -2.41 | -5.30 | 0.0002119 |
| VPS54   | -2.41 | -5.30 | 0.001282  |
| ANKFY1  | -2.41 | -5.31 | 0.0002342 |
| GART    | -2.41 | -5.31 | 0.003751  |
| GLUD1   | -2.41 | -5.31 | 0.001187  |
| AGO1    | -2.41 | -5.31 | 0.00143   |
| CABIN1  | -2.41 | -5.31 | 0.003469  |
| DDI1    | -2.41 | -5.31 | 0.003688  |
| KPNB1   | -2.41 | -5.31 | 3.76E-05  |
| NAT10   | -2.41 | -5.31 | 6.71E-05  |
| SELENOI | -2.41 | -5.31 | 0.0009493 |
| SMOC2   | -2.41 | -5.31 | 0.0007563 |
| TLE4Z1  | -2.41 | -5.31 | 0.002241  |
| P3H1    | -2.41 | -5.32 | 0.003176  |
| WDFY3   | -2.41 | -5.32 | 0.0003101 |
| ANKRD26 | -2.41 | -5.33 | 0.0001627 |
| CAMSAP1 | -2.41 | -5.33 | 5.01E-05  |
| NRBP1   | -2.41 | -5.33 | 0.0007901 |
| PPP2R3B | -2.41 | -5.33 | 0.0002205 |
| RSBN1L  | -2.41 | -5.33 | 0.001161  |
| ZFR2    | -2.41 | -5.33 | 0.0001958 |
| ZRANB1  | -2.41 | -5.33 | 0.001747  |
| APOO    | -2.41 | -5.33 | 0.003911  |
| CHD6    | -2.41 | -5.33 | 0.001212  |
| LINS1   | -2.41 | -5.33 | 0.001926  |
| NES     | -2.41 | -5.33 | 1.23E-05  |
| SINHCAF | -2.41 | -5.33 | 0.005066  |
| SMYD5   | -2.41 | -5.33 | 0.001645  |
| BRD4    | -2.42 | -5.34 | 0.003528  |
| CUL4B   | -2.42 | -5.34 | 0.001389  |
| MACF1   | -2.42 | -5.34 | 0.0003642 |
| MGA     | -2.42 | -5.34 | 0.0002165 |

|            |       |       |           |
|------------|-------|-------|-----------|
| MYO19      | -2.42 | -5.34 | 0.003366  |
| STX8       | -2.42 | -5.34 | 0.005205  |
| ARID4B     | -2.42 | -5.35 | 0.0003796 |
| EEPD1      | -2.42 | -5.35 | 0.001466  |
| HDX        | -2.42 | -5.35 | 0.003632  |
| CALD1      | -2.42 | -5.35 | 0.0006848 |
| MYOD1      | -2.42 | -5.35 | 9.33E-09  |
| MYOM3      | -2.42 | -5.35 | 3.67E-05  |
| PTX3       | -2.42 | -5.35 | 8.81E-05  |
| ST3GAL5    | -2.42 | -5.35 | 0.001583  |
| USP19      | -2.42 | -5.35 | 0.0007982 |
| USPL1      | -2.42 | -5.35 | 0.0003214 |
| GPS1       | -2.42 | -5.36 | 0.001724  |
| LARP4B     | -2.42 | -5.36 | 0.001376  |
| MIA2       | -2.42 | -5.36 | 0.0003121 |
| PALB2      | -2.42 | -5.36 | 0.003272  |
| PAXIP1     | -2.42 | -5.36 | 0.003938  |
| PDGFRA     | -2.42 | -5.36 | 6.45E-06  |
| PRKD3      | -2.42 | -5.36 | 0.002517  |
| SOWAHC     | -2.42 | -5.36 | 0.0004681 |
| ZNF516     | -2.42 | -5.36 | 0.001598  |
| BICC1      | -2.42 | -5.36 | 4.42E-05  |
| C14H7orf26 | -2.42 | -5.36 | 0.0009659 |
| CLDN1      | -2.42 | -5.36 | 0.001068  |
| DEPDC5     | -2.42 | -5.36 | 0.0003423 |
| FAR2       | -2.42 | -5.36 | 0.002015  |
| JMJD1C     | -2.42 | -5.36 | 4.67E-05  |
| PIM3       | -2.42 | -5.36 | 0.001162  |
| TUBGCP4    | -2.42 | -5.36 | 0.00163   |
| ALG3       | -2.43 | -5.37 | 0.001445  |
| CWC22      | -2.43 | -5.37 | 0.002299  |
| HELLS      | -2.43 | -5.37 | 0.0002222 |
| PCDH19     | -2.43 | -5.37 | 0.001185  |
| PRR14L     | -2.43 | -5.37 | 0.0001305 |
| SLC4A7     | -2.43 | -5.37 | 0.0004225 |
| UQCRC2     | -2.43 | -5.37 | 0.0008697 |
| CCT5       | -2.43 | -5.38 | 0.004714  |
| DDX47      | -2.43 | -5.38 | 0.004329  |
| MAN2A1     | -2.43 | -5.38 | 0.00108   |
| NCKAP5     | -2.43 | -5.38 | 0.0001357 |
| ADGRL2     | -2.43 | -5.38 | 0.0004064 |
| INF2       | -2.43 | -5.38 | 0.0004468 |
| LOC416257  | -2.43 | -5.38 | 0.002194  |
| NUDT16L1   | -2.43 | -5.38 | 0.002277  |
| ROCK2      | -2.43 | -5.38 | 0.000444  |
| STEAP1     | -2.43 | -5.38 | 8.86E-05  |
| DPP9       | -2.43 | -5.39 | 0.001537  |
| DUS2       | -2.43 | -5.39 | 0.003202  |
| EXOC2      | -2.43 | -5.39 | 0.0002599 |
| HERC1      | -2.43 | -5.39 | 0.0003755 |

|           |       |       |           |
|-----------|-------|-------|-----------|
| LOC426820 | -2.43 | -5.39 | 1.64E-05  |
| NRCAM     | -2.43 | -5.39 | 0.0001287 |
| OSGIN2    | -2.43 | -5.39 | 0.004352  |
| CAD       | -2.43 | -5.40 | 0.0001314 |
| CCNL2     | -2.43 | -5.40 | 0.002248  |
| GPR176    | -2.43 | -5.40 | 0.00499   |
| HADHB     | -2.43 | -5.40 | 0.003751  |
| HYOU1     | -2.43 | -5.40 | 0.00109   |
| IQGAP2    | -2.43 | -5.40 | 0.0003687 |
| PANK1     | -2.43 | -5.40 | 0.005062  |
| TSR1      | -2.43 | -5.40 | 0.0001721 |
| DCLK1     | -2.43 | -5.40 | 0.0003713 |
| EGFR      | -2.43 | -5.40 | 0.0001943 |
| EXOC1     | -2.43 | -5.40 | 8.86E-05  |
| GEMIN4    | -2.43 | -5.40 | 0.001496  |
| GPR161    | -2.43 | -5.40 | 0.001722  |
| NEFM      | -2.43 | -5.40 | 7.34E-07  |
| NUP98     | -2.43 | -5.40 | 0.003291  |
| WDR12     | -2.43 | -5.40 | 0.003989  |
| ASCC2     | -2.44 | -5.41 | 0.00395   |
| CCT7      | -2.44 | -5.41 | 0.0006058 |
| CYFIP2    | -2.44 | -5.41 | 0.0007653 |
| MAP3K4    | -2.44 | -5.41 | 0.005146  |
| SETMAR    | -2.44 | -5.41 | 0.001186  |
| CAPN7     | -2.44 | -5.41 | 0.001783  |
| DNAJC3    | -2.44 | -5.41 | 0.003648  |
| LOC421241 | -2.44 | -5.41 | 0.001342  |
| MCC       | -2.44 | -5.41 | 0.0001787 |
| AHCY      | -2.44 | -5.42 | 0.004436  |
| DNM1      | -2.44 | -5.42 | 0.001441  |
| IBTK      | -2.44 | -5.42 | 0.0007535 |
| LMBR1     | -2.44 | -5.42 | 0.004874  |
| NNT       | -2.44 | -5.42 | 0.001227  |
| RNF20     | -2.44 | -5.42 | 0.001532  |
| RRP12     | -2.44 | -5.42 | 1.63E-05  |
| CABLES1   | -2.44 | -5.43 | 0.0009614 |
| CLDN5     | -2.44 | -5.43 | 0.002075  |
| ANKZF1    | -2.44 | -5.43 | 0.0004745 |
| ASH1L     | -2.44 | -5.43 | 0.001923  |
| BBS9      | -2.44 | -5.43 | 0.0002172 |
| CCNT2     | -2.44 | -5.43 | 0.00421   |
| CDAN1     | -2.44 | -5.43 | 0.002083  |
| CHADL     | -2.44 | -5.43 | 0.001158  |
| DHX30     | -2.44 | -5.43 | 0.003037  |
| FILIP1L   | -2.44 | -5.43 | 8.20E-05  |
| MARCH7    | -2.44 | -5.43 | 0.00519   |
| OLFML2B   | -2.44 | -5.43 | 0.001199  |
| PARP4     | -2.44 | -5.43 | 0.0001515 |
| VASN      | -2.44 | -5.43 | 0.004741  |
| FBXO11    | -2.44 | -5.44 | 0.003215  |



|           |       |       |           |
|-----------|-------|-------|-----------|
| HAUS6     | -2.44 | -5.44 | 0.0005648 |
| JARID2    | -2.44 | -5.44 | 0.0006122 |
| MCM4      | -2.44 | -5.44 | 0.0003798 |
| TTC37     | -2.44 | -5.44 | 0.0008981 |
| AATF      | -2.45 | -5.45 | 2.68E-05  |
| BORA      | -2.45 | -5.45 | 0.0007182 |
| EMILIN3   | -2.45 | -5.45 | 3.92E-07  |
| KANK1     | -2.45 | -5.45 | 0.001374  |
| LMNB2     | -2.45 | -5.45 | 0.0003122 |
| N4BP2     | -2.45 | -5.45 | 0.0007074 |
| PAPSS1    | -2.45 | -5.45 | 0.000528  |
| RALGAPA1  | -2.45 | -5.45 | 0.001692  |
| CYB5R4    | -2.45 | -5.45 | 0.001592  |
| SRP72     | -2.45 | -5.45 | 0.004743  |
| SUZ12     | -2.45 | -5.45 | 6.93E-05  |
| FAM160B1  | -2.45 | -5.46 | 0.0001042 |
| NUFIP2    | -2.45 | -5.46 | 0.003302  |
| PAN3      | -2.45 | -5.46 | 0.003103  |
| SECISBP2L | -2.45 | -5.46 | 0.001027  |
| TAF7L     | -2.45 | -5.46 | 0.0034    |
| UBR5      | -2.45 | -5.46 | 3.71E-05  |
| DHX29     | -2.45 | -5.47 | 0.001523  |
| EEA1      | -2.45 | -5.47 | 0.0008131 |
| PCDHGA2   | -2.45 | -5.47 | 0.001908  |
| PHLPP1    | -2.45 | -5.47 | 0.0001768 |
| RAPGEF6   | -2.45 | -5.47 | 0.00081   |
| TM4SF18   | -2.45 | -5.47 | 0.003404  |
| DNAJC27   | -2.45 | -5.47 | 0.0004639 |
| HSPA9     | -2.45 | -5.47 | 0.0007085 |
| LRRC8D    | -2.45 | -5.47 | 0.002993  |
| MARCKS    | -2.45 | -5.47 | 0.001038  |
| METTL23   | -2.45 | -5.47 | 0.004946  |
| OXCT1     | -2.45 | -5.47 | 7.31E-05  |
| UGGT1     | -2.45 | -5.47 | 0.0008038 |
| ADAMTSL3  | -2.46 | -5.48 | 0.0002009 |
| CRIM1     | -2.46 | -5.48 | 0.0004101 |
| PARD3     | -2.46 | -5.48 | 0.003376  |
| AFTPH     | -2.46 | -5.49 | 0.001745  |
| BTBD6     | -2.46 | -5.49 | 0.003113  |
| DGKQ      | -2.46 | -5.49 | 0.0002433 |
| GLG1      | -2.46 | -5.49 | 0.0024    |
| GMNN      | -2.46 | -5.49 | 0.003057  |
| QARS      | -2.46 | -5.49 | 0.0002567 |
| STAG2     | -2.46 | -5.49 | 0.0003351 |
| ZW10      | -2.46 | -5.49 | 0.003289  |
| FAAP24    | -2.46 | -5.50 | 0.002162  |
| FGFR3     | -2.46 | -5.50 | 0.0008418 |
| HSPA12A   | -2.46 | -5.50 | 0.0005352 |
| MID1      | -2.46 | -5.50 | 0.00198   |
| NUF2      | -2.46 | -5.50 | 0.002511  |

|          |       |       |           |
|----------|-------|-------|-----------|
| OGFOD1   | -2.46 | -5.50 | 0.001257  |
| SHROOM3  | -2.46 | -5.50 | 0.002199  |
| TRMT1L   | -2.46 | -5.50 | 0.0002141 |
| ADAMTS17 | -2.46 | -5.50 | 0.0006257 |
| ALOX5    | -2.46 | -5.50 | 0.001061  |
| EMILIN2  | -2.46 | -5.50 | 0.001916  |
| ESCO2    | -2.46 | -5.50 | 0.0004875 |
| FAM83B   | -2.46 | -5.50 | 0.002758  |
| RIOX1    | -2.46 | -5.50 | 0.0013    |
| SH3GL3   | -2.46 | -5.50 | 0.0004196 |
| UAP1L1   | -2.46 | -5.50 | 0.0006071 |
| ZNF644   | -2.46 | -5.50 | 0.004771  |
| DCTN4    | -2.46 | -5.51 | 0.0001829 |
| GNA13    | -2.46 | -5.51 | 0.0001948 |
| GPR107   | -2.46 | -5.51 | 0.0002314 |
| MBD5     | -2.46 | -5.51 | 0.001904  |
| MVP      | -2.46 | -5.51 | 0.002651  |
| PSEN1    | -2.46 | -5.51 | 0.004229  |
| CNOT6    | -2.46 | -5.52 | 8.02E-06  |
| SOCS6    | -2.46 | -5.52 | 0.002874  |
| TGFB2    | -2.46 | -5.52 | 0.002048  |
| TSPAN14  | -2.46 | -5.52 | 0.0003344 |
| GNAL     | -2.47 | -5.52 | 0.004072  |
| PRKDC    | -2.47 | -5.52 | 0.0006278 |
| ACAT1    | -2.47 | -5.53 | 0.0008028 |
| PISD     | -2.47 | -5.53 | 0.00189   |
| PLTP     | -2.47 | -5.53 | 0.0001649 |
| SEC23B   | -2.47 | -5.53 | 0.004299  |
| TSC22D2  | -2.47 | -5.53 | 0.002874  |
| DIDO1    | -2.47 | -5.54 | 0.00201   |
| G2E3     | -2.47 | -5.54 | 0.0007604 |
| HSPA8    | -2.47 | -5.54 | 0.004343  |
| MARK1    | -2.47 | -5.54 | 3.44E-05  |
| PCCA     | -2.47 | -5.54 | 0.004307  |
| PSMC3    | -2.47 | -5.54 | 0.00179   |
| AMER1    | -2.47 | -5.55 | 3.18E-05  |
| FRMD6    | -2.47 | -5.55 | 0.005012  |
| HSP90AA1 | -2.47 | -5.55 | 0.001895  |
| IL17RD   | -2.47 | -5.55 | 2.26E-05  |
| IVD      | -2.47 | -5.55 | 0.003692  |
| LONRF2   | -2.47 | -5.55 | 0.001214  |
| PANX3    | -2.47 | -5.55 | 4.78E-05  |
| AHCTF1   | -2.47 | -5.56 | 1.48E-06  |
| CCNF     | -2.47 | -5.56 | 3.54E-05  |
| FAM120A  | -2.47 | -5.56 | 0.0001399 |
| GNB2     | -2.47 | -5.56 | 0.001785  |
| LYST     | -2.47 | -5.56 | 0.0006098 |
| NPEPPS   | -2.47 | -5.56 | 0.004352  |
| PARP1    | -2.47 | -5.56 | 0.0007104 |
| PKM      | -2.47 | -5.56 | 0.0004919 |

|          |       |       |           |
|----------|-------|-------|-----------|
| SHCBP1   | -2.47 | -5.56 | 0.0002845 |
| STXBP5L  | -2.47 | -5.56 | 0.0003761 |
| AGPAT4   | -2.48 | -5.56 | 0.002709  |
| CLCC1    | -2.48 | -5.56 | 0.00505   |
| FAF1     | -2.48 | -5.56 | 0.004066  |
| ABCC13   | -2.48 | -5.57 | 0.001887  |
| CPD      | -2.48 | -5.57 | 0.0001835 |
| DHX15    | -2.48 | -5.57 | 0.000238  |
| DIAPH2   | -2.48 | -5.57 | 9.96E-06  |
| HSP90AB1 | -2.48 | -5.57 | 0.0003633 |
| IPMK     | -2.48 | -5.57 | 0.004695  |
| RPGRIP1L | -2.48 | -5.57 | 0.00412   |
| SRPX     | -2.48 | -5.57 | 0.002454  |
| SYNE2    | -2.48 | -5.57 | 0.000272  |
| TBCK     | -2.48 | -5.57 | 0.0005538 |
| TLN1     | -2.48 | -5.57 | 3.91E-05  |
| MLYCD    | -2.48 | -5.58 | 0.004552  |
| PI4K2B   | -2.48 | -5.58 | 0.001936  |
| PSEN2    | -2.48 | -5.58 | 0.000484  |
| RAPGEF1  | -2.48 | -5.58 | 0.0001803 |
| UBR1     | -2.48 | -5.58 | 6.15E-05  |
| ESRRG    | -2.48 | -5.58 | 0.004807  |
| IL1R1    | -2.48 | -5.58 | 0.0003222 |
| STAG1    | -2.48 | -5.58 | 0.00336   |
| YPEL1    | -2.48 | -5.58 | 0.0008162 |
| DHTKD1   | -2.48 | -5.59 | 0.001347  |
| EIF2B5   | -2.48 | -5.59 | 0.001063  |
| ELMSAN1  | -2.48 | -5.59 | 0.0004506 |
| FAM69B   | -2.48 | -5.59 | 0.002078  |
| FNIP2    | -2.48 | -5.59 | 0.0004944 |
| KDM3A    | -2.48 | -5.59 | 0.002944  |
| KIF13A   | -2.48 | -5.59 | 0.0008683 |
| PTPRS    | -2.48 | -5.59 | 0.0005272 |
| RBL2     | -2.48 | -5.59 | 0.0003948 |
| ZNF407   | -2.48 | -5.59 | 0.0001043 |
| ECPAS    | -2.48 | -5.60 | 0.0006762 |
| IRX2     | -2.48 | -5.60 | 6.90E-06  |
| LAMA5    | -2.48 | -5.60 | 0.0006683 |
| NFS1     | -2.48 | -5.60 | 0.002135  |
| SHC4     | -2.48 | -5.60 | 0.001303  |
| HSPA4L   | -2.49 | -5.60 | 0.0004222 |
| AP3B1    | -2.49 | -5.61 | 0.0009742 |
| FAM129A  | -2.49 | -5.61 | 0.0003294 |
| HINFP    | -2.49 | -5.61 | 0.001814  |
| NOP14    | -2.49 | -5.61 | 0.001818  |
| TENM2    | -2.49 | -5.61 | 8.08E-06  |
| NUP160   | -2.49 | -5.62 | 1.16E-05  |
| PLOD1    | -2.49 | -5.62 | 0.00115   |
| SMPD4    | -2.49 | -5.62 | 0.001493  |
| TPR      | -2.49 | -5.62 | 3.75E-05  |

|          |       |       |           |
|----------|-------|-------|-----------|
| ANAPC1   | -2.49 | -5.62 | 0.0008034 |
| BCAR3    | -2.49 | -5.62 | 0.0003606 |
| COG1     | -2.49 | -5.62 | 0.005142  |
| GTSE1    | -2.49 | -5.62 | 0.001764  |
| KDM4A    | -2.49 | -5.62 | 0.005096  |
| KLF6     | -2.49 | -5.62 | 0.004447  |
| NSF      | -2.49 | -5.62 | 0.001901  |
| PPP1R14C | -2.49 | -5.62 | 8.50E-06  |
| TMEM128  | -2.49 | -5.62 | 0.005217  |
| AKAP1    | -2.49 | -5.63 | 0.001774  |
| CREBZF   | -2.49 | -5.63 | 0.0001488 |
| INTS12   | -2.49 | -5.63 | 0.005157  |
| KIF15    | -2.49 | -5.63 | 9.74E-07  |
| KLHL29   | -2.49 | -5.63 | 0.0005144 |
| STK4     | -2.49 | -5.63 | 0.003807  |
| TLE1     | -2.49 | -5.63 | 1.08E-05  |
| ZZZ3     | -2.49 | -5.63 | 0.0004741 |
| NCALD    | -2.49 | -5.64 | 0.004487  |
| TMEM164  | -2.49 | -5.64 | 0.004497  |
| CEBPZ    | -2.50 | -5.64 | 0.003486  |
| GGA1     | -2.50 | -5.64 | 0.00213   |
| KBTBD8   | -2.50 | -5.64 | 0.0002779 |
| MCM5     | -2.50 | -5.64 | 1.10E-05  |
| C3AR1    | -2.50 | -5.65 | 2.33E-06  |
| EFNB2    | -2.50 | -5.65 | 0.0004697 |
| KCNMA1   | -2.50 | -5.65 | 0.003908  |
| MYO1E    | -2.50 | -5.65 | 0.0001211 |
| PDIA3    | -2.50 | -5.65 | 0.001719  |
| PIGS     | -2.50 | -5.65 | 0.002372  |
| RDH12    | -2.50 | -5.65 | 0.001717  |
| SACS     | -2.50 | -5.65 | 1.60E-05  |
| SLC4A1AP | -2.50 | -5.65 | 0.002282  |
| WIF1     | -2.50 | -5.65 | 6.91E-06  |
| ABRAXAS2 | -2.50 | -5.66 | 0.004542  |
| CCT4     | -2.50 | -5.66 | 0.001893  |
| DIO3     | -2.50 | -5.66 | 0.0003423 |
| MCM3AP   | -2.50 | -5.66 | 0.003432  |
| MIPOL1   | -2.50 | -5.66 | 0.002854  |
| PDS5A    | -2.50 | -5.66 | 0.0003186 |
| PRDM2    | -2.50 | -5.66 | 0.0002797 |
| CKAP4    | -2.50 | -5.66 | 0.000227  |
| MB21D1   | -2.50 | -5.66 | 0.0002035 |
| PGRMC2   | -2.50 | -5.66 | 0.0003718 |
| RANBPL   | -2.50 | -5.66 | 5.27E-05  |
| KIF1C    | -2.50 | -5.67 | 2.38E-05  |
| SLC24A3  | -2.50 | -5.67 | 0.0007264 |
| SLC43A2  | -2.50 | -5.67 | 0.0006817 |
| DGKZ     | -2.51 | -5.68 | 0.002133  |
| FEM1C    | -2.51 | -5.68 | 0.001016  |
| IGFBP3   | -2.51 | -5.68 | 0.004816  |

|              |       |       |           |
|--------------|-------|-------|-----------|
| MPP5         | -2.51 | -5.68 | 0.001573  |
| ARMC8        | -2.51 | -5.68 | 0.000191  |
| KPNA4        | -2.51 | -5.68 | 0.004151  |
| PNPLA8       | -2.51 | -5.68 | 0.001666  |
| TMEM87A      | -2.51 | -5.68 | 0.0004006 |
| YARS         | -2.51 | -5.68 | 0.001686  |
| CEP170P1     | -2.51 | -5.69 | 0.00135   |
| DUSP8        | -2.51 | -5.69 | 0.0003264 |
| LOC101752211 | -2.51 | -5.69 | 0.002632  |
| RBBP5        | -2.51 | -5.69 | 0.003386  |
| SCFD1        | -2.51 | -5.69 | 0.003116  |
| TCP1         | -2.51 | -5.69 | 0.005381  |
| CCDC66       | -2.51 | -5.70 | 0.003058  |
| CEP63        | -2.51 | -5.70 | 0.001361  |
| FXR1         | -2.51 | -5.70 | 0.003633  |
| GATAD2A      | -2.51 | -5.70 | 0.001904  |
| PLBD1        | -2.51 | -5.70 | 0.0006732 |
| RIF1         | -2.51 | -5.70 | 0.0003479 |
| SGK3         | -2.51 | -5.70 | 0.001968  |
| TUBAL3       | -2.51 | -5.70 | 1.03E-06  |
| ARVCF        | -2.51 | -5.71 | 5.97E-05  |
| BHLHE40      | -2.51 | -5.71 | 0.003699  |
| CUL5         | -2.51 | -5.71 | 0.00437   |
| DHDDS        | -2.51 | -5.71 | 0.0001849 |
| ACAT2        | -2.51 | -5.71 | 0.005042  |
| BIRC5        | -2.51 | -5.71 | 0.0004203 |
| CAT          | -2.51 | -5.71 | 0.005054  |
| DENND2C      | -2.51 | -5.71 | 0.002168  |
| EPB41        | -2.51 | -5.71 | 0.0001095 |
| LZTR1        | -2.51 | -5.71 | 0.002888  |
| NEFL         | -2.51 | -5.71 | 2.17E-06  |
| PCNT         | -2.51 | -5.71 | 3.21E-05  |
| PLOD3        | -2.51 | -5.71 | 0.0002417 |
| SMARCA2      | -2.51 | -5.71 | 0.002251  |
| ZBTB43       | -2.51 | -5.71 | 0.0002846 |
| DEPDC1       | -2.52 | -5.73 | 1.13E-05  |
| ID1          | -2.52 | -5.73 | 4.70E-05  |
| SLC16A1      | -2.52 | -5.73 | 0.0009043 |
| BDH1B        | -2.52 | -5.73 | 0.0006064 |
| LAMB1        | -2.52 | -5.73 | 0.0006683 |
| NCLN         | -2.52 | -5.73 | 0.0001242 |
| P4HA1        | -2.52 | -5.73 | 0.001147  |
| SLC25A22     | -2.52 | -5.73 | 4.77E-05  |
| TMEM120B     | -2.52 | -5.73 | 0.0003017 |
| USP5         | -2.52 | -5.73 | 0.002365  |
| ZNF767       | -2.52 | -5.73 | 0.0008551 |
| BNC2         | -2.52 | -5.74 | 0.001759  |
| CKS2         | -2.52 | -5.74 | 0.0003936 |
| HABP4        | -2.52 | -5.74 | 0.0009457 |
| KCTD7        | -2.52 | -5.74 | 0.00129   |

|          |       |       |           |
|----------|-------|-------|-----------|
| MMS22L   | -2.52 | -5.74 | 0.0003173 |
| MRPL37   | -2.52 | -5.74 | 0.004721  |
| PEX6     | -2.52 | -5.74 | 5.53E-05  |
| SLC25A38 | -2.52 | -5.74 | 0.001676  |
| TBCCD1   | -2.52 | -5.74 | 0.004937  |
| TNS1     | -2.52 | -5.74 | 0.00158   |
| DHODH    | -2.52 | -5.75 | 0.0008267 |
| EEF1G    | -2.52 | -5.75 | 0.000158  |
| FUBP1    | -2.52 | -5.75 | 4.56E-05  |
| IFRD1    | -2.52 | -5.75 | 7.84E-06  |
| IFT81    | -2.52 | -5.75 | 0.005069  |
| IPO5     | -2.52 | -5.75 | 1.82E-05  |
| NCAPD3   | -2.52 | -5.75 | 0.001035  |
| NLGN1    | -2.52 | -5.75 | 0.0004108 |
| SMTN_C   | -2.52 | -5.75 | 5.20E-06  |
| UBXN7    | -2.52 | -5.75 | 0.00153   |
| GCC2     | -2.53 | -5.76 | 0.0001509 |
| IPO7     | -2.53 | -5.76 | 0.0009805 |
| NASP     | -2.53 | -5.76 | 0.002862  |
| SLC35B2  | -2.53 | -5.76 | 0.0004808 |
| TMEM67   | -2.53 | -5.76 | 0.004782  |
| AKAP17A  | -2.53 | -5.77 | 0.003196  |
| CNMD     | -2.53 | -5.77 | 5.95E-09  |
| GPSM2    | -2.53 | -5.77 | 0.001662  |
| HEPH     | -2.53 | -5.77 | 0.003143  |
| INSC     | -2.53 | -5.77 | 3.30E-05  |
| LETM1    | -2.53 | -5.77 | 0.0005746 |
| MED15    | -2.53 | -5.77 | 0.004898  |
| NKRF     | -2.53 | -5.77 | 6.76E-06  |
| PHF20L1  | -2.53 | -5.77 | 0.005034  |
| ZFAND4   | -2.53 | -5.77 | 0.003429  |
| GLTPD2   | -2.53 | -5.77 | 0.002149  |
| ICMT     | -2.53 | -5.77 | 0.003486  |
| KATNAL1  | -2.53 | -5.77 | 0.004916  |
| NAF1     | -2.53 | -5.77 | 0.002718  |
| NPAS3    | -2.53 | -5.77 | 1.97E-05  |
| WDR91    | -2.53 | -5.77 | 0.001442  |
| ATF4     | -2.53 | -5.78 | 0.0009214 |
| BCS1L    | -2.53 | -5.78 | 0.005156  |
| FBXL4    | -2.53 | -5.78 | 0.0003704 |
| GLE1     | -2.53 | -5.78 | 0.003421  |
| GSPT2    | -2.53 | -5.78 | 0.003435  |
| GTF2I    | -2.53 | -5.78 | 0.002611  |
| MYO6     | -2.53 | -5.78 | 0.0007095 |
| PTPRK    | -2.53 | -5.78 | 0.0002985 |
| RFWD2    | -2.53 | -5.78 | 0.00325   |
| SMG8     | -2.53 | -5.78 | 0.0004015 |
| SACM1L   | -2.53 | -5.79 | 0.0001003 |
| SCAF4    | -2.53 | -5.79 | 0.0004854 |
| SLC45A4  | -2.53 | -5.79 | 0.002609  |

|          |       |       |           |
|----------|-------|-------|-----------|
| TMCO7    | -2.53 | -5.79 | 0.0001518 |
| KNOP1    | -2.54 | -5.80 | 0.005206  |
| NADSYN1  | -2.54 | -5.80 | 0.002877  |
| NUP210   | -2.54 | -5.80 | 0.001914  |
| PQLC2    | -2.54 | -5.80 | 0.003459  |
| PTPRF    | -2.54 | -5.80 | 0.0004301 |
| SF3B3    | -2.54 | -5.80 | 0.0002712 |
| TBP      | -2.54 | -5.80 | 0.002405  |
| TMEM131L | -2.54 | -5.80 | 0.003934  |
| TMEM68   | -2.54 | -5.80 | 0.002142  |
| WASHC1   | -2.54 | -5.80 | 0.003867  |
| ZNF518A  | -2.54 | -5.80 | 0.001171  |
| DUSP1    | -2.54 | -5.80 | 0.0005928 |
| EIF4G3   | -2.54 | -5.80 | 8.03E-05  |
| G0S2     | -2.54 | -5.80 | 0.001049  |
| GPI      | -2.54 | -5.80 | 0.0002248 |
| GUSB     | -2.54 | -5.80 | 0.000254  |
| RUNX1T1  | -2.54 | -5.80 | 0.000147  |
| TERF2    | -2.54 | -5.80 | 0.004955  |
| VPS13D   | -2.54 | -5.80 | 0.002296  |
| ALDH5A1  | -2.54 | -5.81 | 0.001878  |
| KIF23    | -2.54 | -5.81 | 0.0007935 |
| LFNG     | -2.54 | -5.81 | 1.14E-06  |
| RRM1     | -2.54 | -5.81 | 0.000172  |
| SEPT6    | -2.54 | -5.81 | 0.002524  |
| TM7SF2   | -2.54 | -5.81 | 0.0003021 |
| ARMC1    | -2.54 | -5.82 | 0.001674  |
| COL4A3BP | -2.54 | -5.82 | 0.00163   |
| KIAA1429 | -2.54 | -5.82 | 0.0002702 |
| LIMS1    | -2.54 | -5.82 | 0.001444  |
| METTL4   | -2.54 | -5.82 | 3.79E-05  |
| MYO5A    | -2.54 | -5.82 | 0.000293  |
| PPP1R12A | -2.54 | -5.82 | 0.0003593 |
| PTBP1    | -2.54 | -5.82 | 0.0003208 |
| TTC21B   | -2.54 | -5.82 | 0.000133  |
| WDR20    | -2.54 | -5.82 | 0.0009614 |
| AGTR2    | -2.54 | -5.82 | 1.97E-05  |
| ARL13B   | -2.54 | -5.82 | 0.003305  |
| NPRL3    | -2.54 | -5.82 | 0.004087  |
| RAF1     | -2.54 | -5.82 | 0.00484   |
| RNASEL   | -2.54 | -5.82 | 0.003046  |
| UNC5B    | -2.54 | -5.82 | 0.0004353 |
| CPEB2    | -2.54 | -5.83 | 0.004446  |
| IPO11    | -2.54 | -5.83 | 0.0005375 |
| KATNBL1  | -2.54 | -5.83 | 0.0002246 |
| MSI2     | -2.54 | -5.83 | 0.001034  |
| USP7     | -2.54 | -5.83 | 7.56E-06  |
| VSTM4    | -2.54 | -5.83 | 0.003731  |
| CLK2     | -2.55 | -5.84 | 0.0006909 |
| COPG1    | -2.55 | -5.84 | 0.0003038 |

|            |       |       |           |
|------------|-------|-------|-----------|
| FAM20B     | -2.55 | -5.84 | 0.002554  |
| RFC3       | -2.55 | -5.84 | 0.001494  |
| TNFRSF1B   | -2.55 | -5.84 | 9.13E-07  |
| ADPRHL2    | -2.55 | -5.85 | 0.002707  |
| ATP5F1C    | -2.55 | -5.85 | 7.13E-05  |
| HSPD1      | -2.55 | -5.85 | 0.0006906 |
| LTO1       | -2.55 | -5.85 | 0.0002042 |
| ACBD3      | -2.55 | -5.85 | 0.001492  |
| ARSB       | -2.55 | -5.85 | 0.001076  |
| FNIP1      | -2.55 | -5.85 | 0.002044  |
| IST1       | -2.55 | -5.85 | 0.001869  |
| NADK       | -2.55 | -5.85 | 8.29E-05  |
| POLE3      | -2.55 | -5.85 | 0.003269  |
| SLC35F5    | -2.55 | -5.85 | 0.0001451 |
| TIAM1      | -2.55 | -5.85 | 0.0001858 |
| TLR2A      | -2.55 | -5.85 | 5.13E-06  |
| YEATS2     | -2.55 | -5.85 | 0.0003315 |
| AKAP12     | -2.55 | -5.86 | 1.69E-06  |
| ARHGEF3    | -2.55 | -5.86 | 0.0006639 |
| ASCC3      | -2.55 | -5.86 | 0.0002124 |
| ENC1       | -2.55 | -5.86 | 0.0009227 |
| MTDH       | -2.55 | -5.86 | 0.0001995 |
| PDE4D      | -2.55 | -5.86 | 2.49E-05  |
| SMARCA1    | -2.55 | -5.86 | 0.001096  |
| ARFGEF1    | -2.55 | -5.87 | 1.95E-05  |
| DCX        | -2.55 | -5.87 | 7.90E-05  |
| DICER1     | -2.55 | -5.87 | 0.0001034 |
| NXT2       | -2.55 | -5.87 | 0.002898  |
| RBM12B     | -2.55 | -5.87 | 0.004165  |
| RRM2       | -2.55 | -5.87 | 6.61E-05  |
| UTP18      | -2.55 | -5.87 | 0.005161  |
| ASNS       | -2.56 | -5.88 | 0.001769  |
| ELL2       | -2.56 | -5.88 | 0.002586  |
| FBXO30     | -2.56 | -5.88 | 4.89E-05  |
| GCLC       | -2.56 | -5.88 | 0.0003518 |
| KAT14      | -2.56 | -5.88 | 0.005344  |
| ANKRD50    | -2.56 | -5.89 | 0.0005384 |
| C1H12orf29 | -2.56 | -5.89 | 0.004943  |
| KMT2E      | -2.56 | -5.89 | 5.13E-06  |
| OSBPL2     | -2.56 | -5.89 | 0.004395  |
| PIK3CB     | -2.56 | -5.89 | 0.0009814 |
| RRBP1      | -2.56 | -5.89 | 2.00E-05  |
| TADA1      | -2.56 | -5.89 | 0.001714  |
| UFL1       | -2.56 | -5.89 | 0.001064  |
| ANO3       | -2.56 | -5.90 | 3.48E-06  |
| ESF1       | -2.56 | -5.90 | 0.001467  |
| F2R        | -2.56 | -5.90 | 0.0001117 |
| KLHL7      | -2.56 | -5.90 | 7.79E-05  |
| RNF214     | -2.56 | -5.90 | 0.004965  |
| RPL27      | -2.56 | -5.90 | 0.00124   |



|             |       |       |           |
|-------------|-------|-------|-----------|
| SASS6       | -2.56 | -5.90 | 0.001287  |
| SCYL2       | -2.56 | -5.90 | 0.0006141 |
| SLC33A1     | -2.56 | -5.90 | 0.003605  |
| SPTAN1      | -2.56 | -5.90 | 4.25E-07  |
| ARIH2       | -2.56 | -5.90 | 0.003093  |
| C24H11orf57 | -2.56 | -5.90 | 0.002598  |
| CKAP2       | -2.56 | -5.90 | 0.0001416 |
| COL5A1      | -2.56 | -5.90 | 0.0002493 |
| LRRC45      | -2.56 | -5.90 | 0.00434   |
| N4BP2L2     | -2.56 | -5.90 | 0.0005232 |
| BUB1        | -2.56 | -5.91 | 0.0001832 |
| IMPAD1      | -2.56 | -5.91 | 0.002025  |
| POC1B       | -2.56 | -5.91 | 0.002217  |
| PRSS35      | -2.56 | -5.91 | 0.002845  |
| EDEM2       | -2.57 | -5.92 | 0.001213  |
| ERC1        | -2.57 | -5.92 | 1.37E-06  |
| MINPP1      | -2.57 | -5.92 | 0.0001631 |
| ORC1        | -2.57 | -5.92 | 1.83E-05  |
| COPB1       | -2.57 | -5.93 | 0.001273  |
| HMGB3       | -2.57 | -5.93 | 0.0006729 |
| MRM3        | -2.57 | -5.93 | 0.002113  |
| ZNF622      | -2.57 | -5.93 | 0.001767  |
| DIAPH3      | -2.57 | -5.93 | 0.0006984 |
| PACSIN3     | -2.57 | -5.93 | 0.002566  |
| PGAM5       | -2.57 | -5.93 | 0.004088  |
| POLR3B      | -2.57 | -5.93 | 1.04E-06  |
| TIAM2       | -2.57 | -5.93 | 9.51E-07  |
| ACTC1       | -2.57 | -5.94 | 8.59E-08  |
| AP2A2       | -2.57 | -5.94 | 0.0003065 |
| CC2D2A      | -2.57 | -5.94 | 0.002909  |
| HK1         | -2.57 | -5.94 | 0.0004719 |
| MAP4        | -2.57 | -5.94 | 4.14E-06  |
| NDC1        | -2.57 | -5.94 | 0.0003177 |
| PQLC3       | -2.57 | -5.94 | 0.0003558 |
| SLC12A7     | -2.57 | -5.94 | 2.72E-05  |
| VAV3        | -2.57 | -5.94 | 0.002277  |
| GPT         | -2.57 | -5.95 | 6.47E-05  |
| LOXL3       | -2.57 | -5.95 | 1.25E-05  |
| MET         | -2.57 | -5.95 | 0.0009442 |
| PPP1R9B     | -2.57 | -5.95 | 0.005351  |
| TLN2        | -2.57 | -5.95 | 8.43E-05  |
| ZCCHC7      | -2.57 | -5.95 | 0.0009112 |
| ACTA1       | -2.57 | -5.95 | 0.0001017 |
| CCDC14      | -2.57 | -5.95 | 0.0006971 |
| GTF3C4      | -2.57 | -5.95 | 3.81E-05  |
| LRBA        | -2.57 | -5.95 | 0.002853  |
| NEDD9       | -2.57 | -5.95 | 3.35E-08  |
| ZBTB10      | -2.57 | -5.95 | 0.0007656 |
| ARPC5L      | -2.58 | -5.96 | 0.002575  |
| CLTCL1      | -2.58 | -5.96 | 0.0004751 |

|          |       |       |           |
|----------|-------|-------|-----------|
| ESPL1    | -2.58 | -5.96 | 0.0006872 |
| FBXO8    | -2.58 | -5.96 | 0.001297  |
| HIGD1A   | -2.58 | -5.96 | 0.000452  |
| LANCL1   | -2.58 | -5.96 | 0.003244  |
| NAGA     | -2.58 | -5.96 | 0.001598  |
| PEX12    | -2.58 | -5.96 | 0.004094  |
| SASH1    | -2.58 | -5.96 | 1.83E-06  |
| SEMA3C   | -2.58 | -5.96 | 0.0001758 |
| HERPUD1  | -2.58 | -5.97 | 3.47E-06  |
| PIM1     | -2.58 | -5.97 | 4.06E-05  |
| RRN3     | -2.58 | -5.97 | 4.12E-06  |
| SCAF11   | -2.58 | -5.97 | 0.003102  |
| TM9SF4   | -2.58 | -5.97 | 0.001356  |
| UBASH3B  | -2.58 | -5.97 | 0.0001328 |
| AMD1     | -2.58 | -5.98 | 0.0003649 |
| CCNDBP1  | -2.58 | -5.98 | 0.004242  |
| HELQ     | -2.58 | -5.98 | 0.001835  |
| MATN3    | -2.58 | -5.98 | 0.000289  |
| SNX13    | -2.58 | -5.98 | 0.005334  |
| TGDS     | -2.58 | -5.98 | 0.004699  |
| CAST     | -2.58 | -5.98 | 0.0001373 |
| INTS2    | -2.58 | -5.98 | 0.001704  |
| LARP4    | -2.58 | -5.98 | 0.0005279 |
| NCBP3    | -2.58 | -5.98 | 0.002591  |
| PPP3CB   | -2.58 | -5.98 | 0.0003704 |
| RAB9B    | -2.58 | -5.98 | 0.003108  |
| RAE1     | -2.58 | -5.98 | 0.0002437 |
| ARL4C    | -2.58 | -5.99 | 0.0001506 |
| ASPSCR1  | -2.58 | -5.99 | 0.004055  |
| CDKN2AIP | -2.58 | -5.99 | 0.003358  |
| CENPO    | -2.58 | -5.99 | 0.001755  |
| LAPTM5   | -2.58 | -5.99 | 2.85E-06  |
| PRIM2    | -2.58 | -5.99 | 0.0006638 |
| SRP68    | -2.58 | -5.99 | 0.004521  |
| SYNCRIP  | -2.58 | -5.99 | 0.00201   |
| TMEM8C   | -2.58 | -5.99 | 3.44E-07  |
| ZC3H14   | -2.58 | -5.99 | 0.002439  |
| ABCD3    | -2.58 | -6.00 | 6.64E-06  |
| ATP13A1  | -2.58 | -6.00 | 0.0002652 |
| CASD1    | -2.58 | -6.00 | 0.001203  |
| COL10A1  | -2.58 | -6.00 | 0.0001236 |
| LAS1L    | -2.58 | -6.00 | 0.0003787 |
| LRRFIP2  | -2.58 | -6.00 | 0.004573  |
| NUDT19   | -2.58 | -6.00 | 3.29E-05  |
| TSC1     | -2.58 | -6.00 | 0.003096  |
| WDR36    | -2.58 | -6.00 | 0.0002632 |
| COL1A1   | -2.59 | -6.01 | 0.0004509 |
| FZD1     | -2.59 | -6.01 | 0.003485  |
| GNA12    | -2.59 | -6.01 | 0.001508  |
| LRRK2    | -2.59 | -6.01 | 0.0005556 |

|          |       |       |           |
|----------|-------|-------|-----------|
| SREK1    | -2.59 | -6.01 | 0.0008067 |
| UBA5     | -2.59 | -6.01 | 0.0001593 |
| CDKN3    | -2.59 | -6.01 | 0.001653  |
| MIEF2    | -2.59 | -6.01 | 0.0008161 |
| PRDM15   | -2.59 | -6.01 | 0.002565  |
| SYNM     | -2.59 | -6.01 | 0.0001455 |
| EPB41L2  | -2.59 | -6.02 | 0.001405  |
| LRRC3B   | -2.59 | -6.02 | 0.001959  |
| MARCH6   | -2.59 | -6.02 | 0.000568  |
| ZC3H15   | -2.59 | -6.02 | 0.005233  |
| AMBRA1   | -2.59 | -6.03 | 0.00171   |
| MYOCD    | -2.59 | -6.03 | 2.11E-05  |
| NLRP1L   | -2.59 | -6.03 | 2.38E-05  |
| PANK4    | -2.59 | -6.03 | 0.003457  |
| PLEKHF2  | -2.59 | -6.03 | 0.002116  |
| RHOU     | -2.59 | -6.03 | 2.01E-05  |
| BRAF     | -2.59 | -6.04 | 0.0006644 |
| GFPT1    | -2.59 | -6.04 | 0.0003914 |
| LRPPRC   | -2.59 | -6.04 | 1.27E-05  |
| MAP2     | -2.59 | -6.04 | 0.0004813 |
| MPP6     | -2.59 | -6.04 | 0.001304  |
| NCOR1    | -2.59 | -6.04 | 9.16E-05  |
| NOMO3    | -2.59 | -6.04 | 0.003039  |
| OTUD3    | -2.59 | -6.04 | 0.001595  |
| AUH      | -2.60 | -6.04 | 0.0009489 |
| SLC20A2  | -2.60 | -6.04 | 0.001108  |
| TLK1L    | -2.60 | -6.04 | 3.43E-06  |
| CAPRIN2  | -2.60 | -6.05 | 0.0006926 |
| CDH2     | -2.60 | -6.05 | 6.82E-05  |
| LUC7L    | -2.60 | -6.05 | 0.0003887 |
| PINX1    | -2.60 | -6.05 | 0.004176  |
| PNPLA7   | -2.60 | -6.05 | 0.001085  |
| UHRF1    | -2.60 | -6.05 | 6.81E-06  |
| CSTF2    | -2.60 | -6.06 | 0.0006474 |
| NR3C2    | -2.60 | -6.06 | 0.0001018 |
| SIK1     | -2.60 | -6.06 | 3.59E-05  |
| WDR4     | -2.60 | -6.06 | 1.78E-05  |
| ARV1     | -2.60 | -6.07 | 0.0007309 |
| CLDN12   | -2.60 | -6.07 | 0.004591  |
| DST      | -2.60 | -6.07 | 0.0001702 |
| KCNK2    | -2.60 | -6.07 | 1.44E-06  |
| KSR1     | -2.60 | -6.07 | 0.002155  |
| PRKX     | -2.60 | -6.07 | 3.69E-06  |
| RASGEF1A | -2.60 | -6.07 | 8.02E-07  |
| SGSM2    | -2.60 | -6.07 | 0.003895  |
| THSD4    | -2.60 | -6.07 | 5.23E-06  |
| ATP2B1   | -2.60 | -6.07 | 0.000498  |
| BAIAP2L1 | -2.60 | -6.07 | 0.001773  |
| PANK3    | -2.60 | -6.07 | 0.0007524 |
| PDCD7    | -2.60 | -6.07 | 0.001032  |

|          |       |       |           |
|----------|-------|-------|-----------|
| PPP4R1L  | -2.60 | -6.07 | 2.02E-05  |
| PRKAA1   | -2.60 | -6.07 | 0.0005071 |
| TK1      | -2.60 | -6.07 | 0.0003365 |
| LMCD1    | -2.60 | -6.08 | 0.0001264 |
| LRRFIP1  | -2.60 | -6.08 | 0.003077  |
| MTHFSD   | -2.60 | -6.08 | 0.003265  |
| PCMTD2   | -2.60 | -6.08 | 0.00134   |
| RLF      | -2.60 | -6.08 | 0.001304  |
| TRIM13   | -2.60 | -6.08 | 0.0001649 |
| CDADC1   | -2.61 | -6.09 | 0.002768  |
| CTR9     | -2.61 | -6.09 | 5.85E-05  |
| DSE      | -2.61 | -6.09 | 0.001168  |
| MTHFD1   | -2.61 | -6.09 | 3.49E-05  |
| AQP1     | -2.61 | -6.10 | 0.001048  |
| MIS18BP1 | -2.61 | -6.10 | 6.30E-05  |
| NUP214   | -2.61 | -6.10 | 0.001358  |
| SLC15A4  | -2.61 | -6.10 | 0.0003928 |
| SLK      | -2.61 | -6.10 | 0.0001574 |
| USP9X    | -2.61 | -6.10 | 0.0002863 |
| ATRN     | -2.61 | -6.10 | 0.001273  |
| EEFSEC   | -2.61 | -6.10 | 0.001297  |
| EME1     | -2.61 | -6.10 | 0.002401  |
| RNMT     | -2.61 | -6.10 | 0.0007668 |
| SLC1A6   | -2.61 | -6.10 | 0.0009972 |
| TMEM2    | -2.61 | -6.10 | 0.0002964 |
| C10ORF12 | -2.61 | -6.11 | 1.69E-05  |
| HOOK3    | -2.61 | -6.11 | 6.56E-05  |
| LRRC8A   | -2.61 | -6.11 | 2.19E-05  |
| QSER1    | -2.61 | -6.11 | 0.0004571 |
| ZFHX3    | -2.61 | -6.11 | 0.0001477 |
| BRF1     | -2.61 | -6.12 | 0.0003704 |
| CAND1    | -2.61 | -6.12 | 0.00354   |
| SCAPER   | -2.61 | -6.12 | 0.005011  |
| TOLLIP   | -2.61 | -6.12 | 0.002244  |
| GSTT1    | -2.62 | -6.13 | 0.0002262 |
| MDM1     | -2.62 | -6.13 | 0.003726  |
| NUP205   | -2.62 | -6.13 | 0.0001099 |
| PLPP3    | -2.62 | -6.13 | 0.0009719 |
| REPS1    | -2.62 | -6.13 | 5.88E-05  |
| WDR18    | -2.62 | -6.13 | 0.002818  |
| MCPH1    | -2.62 | -6.14 | 0.0002584 |
| PDHX     | -2.62 | -6.14 | 0.0001309 |
| PDP2     | -2.62 | -6.14 | 2.84E-06  |
| POT1     | -2.62 | -6.14 | 0.002824  |
| SCYL3    | -2.62 | -6.14 | 0.003465  |
| SDHA     | -2.62 | -6.14 | 0.002309  |
| VRK1     | -2.62 | -6.14 | 0.0004733 |
| WAC      | -2.62 | -6.14 | 0.001329  |
| ETFBKMT  | -2.62 | -6.14 | 0.0006434 |
| FAM114A2 | -2.62 | -6.14 | 0.0007215 |

|          |       |       |           |
|----------|-------|-------|-----------|
| HSP90B1  | -2.62 | -6.14 | 0.001293  |
| SLIT2    | -2.62 | -6.14 | 0.0001296 |
| GPR34    | -2.62 | -6.15 | 1.60E-07  |
| KCNK5    | -2.62 | -6.15 | 3.51E-07  |
| LARS     | -2.62 | -6.15 | 0.0003006 |
| MCF2     | -2.62 | -6.15 | 0.0005052 |
| MTMR8    | -2.62 | -6.15 | 0.000639  |
| NSUN2    | -2.62 | -6.15 | 0.0004505 |
| SLC16A3  | -2.62 | -6.15 | 0.0001577 |
| SMURF2   | -2.62 | -6.15 | 3.44E-05  |
| ZNF292   | -2.62 | -6.15 | 0.0003473 |
| CHTF18   | -2.62 | -6.16 | 0.0007727 |
| GNAI1    | -2.62 | -6.16 | 0.001515  |
| MVB12B   | -2.62 | -6.16 | 0.001628  |
| NSUN4    | -2.62 | -6.16 | 0.002894  |
| RHNO1    | -2.62 | -6.16 | 0.0006976 |
| SPTLC2   | -2.62 | -6.16 | 0.0002291 |
| FOXO3    | -2.62 | -6.17 | 0.000305  |
| GCN1     | -2.62 | -6.17 | 4.43E-05  |
| MIA3     | -2.62 | -6.17 | 1.51E-05  |
| WDR47    | -2.62 | -6.17 | 0.001388  |
| USP34    | -2.63 | -6.17 | 0.0003209 |
| ADCK2    | -2.63 | -6.18 | 0.00198   |
| COMT     | -2.63 | -6.18 | 5.61E-05  |
| NTHL1    | -2.63 | -6.18 | 0.005227  |
| PDCD4    | -2.63 | -6.18 | 0.001945  |
| PLEKHO1  | -2.63 | -6.18 | 0.001358  |
| PKP2     | -2.63 | -6.19 | 0.001305  |
| TMEM260  | -2.63 | -6.19 | 0.001071  |
| PELO     | -2.63 | -6.20 | 0.003902  |
| TERF1    | -2.63 | -6.20 | 0.0007336 |
| TSPAN6   | -2.63 | -6.20 | 0.001222  |
| XPO4     | -2.63 | -6.20 | 0.001159  |
| AMDHD2   | -2.63 | -6.21 | 0.0005359 |
| JUP      | -2.63 | -6.21 | 0.0002164 |
| MDM2     | -2.63 | -6.21 | 1.32E-05  |
| PREX1    | -2.63 | -6.21 | 0.003089  |
| ABI2     | -2.64 | -6.21 | 3.49E-05  |
| F2RL1    | -2.64 | -6.21 | 0.0001378 |
| ITPK1    | -2.64 | -6.21 | 6.44E-05  |
| KTN1     | -2.64 | -6.21 | 0.0001192 |
| RRM2B    | -2.64 | -6.21 | 0.005304  |
| TPRA1    | -2.64 | -6.21 | 0.00133   |
| ARHGAP21 | -2.64 | -6.22 | 0.0004647 |
| CPOX     | -2.64 | -6.22 | 0.00206   |
| NEO1     | -2.64 | -6.22 | 0.001356  |
| NGLY1    | -2.64 | -6.22 | 0.0002108 |
| PIK3CA   | -2.64 | -6.22 | 0.004427  |
| SEC14L1  | -2.64 | -6.22 | 0.0005668 |
| CDKN1B   | -2.64 | -6.23 | 0.002629  |

|             |       |       |           |
|-------------|-------|-------|-----------|
| KIF4A       | -2.64 | -6.23 | 2.29E-07  |
| SEC23IP     | -2.64 | -6.23 | 0.005327  |
| SESN3       | -2.64 | -6.23 | 4.73E-05  |
| ABCC4       | -2.64 | -6.24 | 0.0002309 |
| ARHGAP28    | -2.64 | -6.24 | 0.001877  |
| CHPF2       | -2.64 | -6.24 | 0.003734  |
| CRY1        | -2.64 | -6.24 | 0.0008012 |
| DIEXF       | -2.64 | -6.24 | 0.0002931 |
| DOP1B       | -2.64 | -6.24 | 0.0001539 |
| C5H14ORF169 | -2.64 | -6.24 | 0.0001822 |
| C8H1orf27   | -2.64 | -6.24 | 0.0002569 |
| CDK11A      | -2.64 | -6.24 | 0.002015  |
| GTF2A1      | -2.64 | -6.24 | 0.001235  |
| MCCC2L      | -2.64 | -6.24 | 0.000428  |
| NAPG        | -2.64 | -6.24 | 2.08E-06  |
| NCAPD2      | -2.64 | -6.24 | 1.43E-06  |
| PDE3B       | -2.64 | -6.24 | 7.43E-05  |
| RAD51C      | -2.64 | -6.24 | 0.00226   |
| WDR33       | -2.64 | -6.24 | 0.0001027 |
| ACSBG2      | -2.64 | -6.25 | 0.0004161 |
| CCNJ        | -2.64 | -6.25 | 4.07E-05  |
| ELAC2       | -2.64 | -6.25 | 2.13E-05  |
| MPHOSPH10   | -2.64 | -6.25 | 0.0002971 |
| MRPL22      | -2.64 | -6.25 | 0.002176  |
| NAA16       | -2.64 | -6.25 | 6.53E-05  |
| OSBPL5      | -2.64 | -6.25 | 0.0009122 |
| PPIL2       | -2.64 | -6.25 | 0.003552  |
| ALG6        | -2.65 | -6.26 | 0.0003433 |
| GIGYF2      | -2.65 | -6.26 | 0.00191   |
| HNRNPAB     | -2.65 | -6.26 | 0.002833  |
| NLN         | -2.65 | -6.26 | 0.002625  |
| PARD6G      | -2.65 | -6.26 | 0.004493  |
| PSME4       | -2.65 | -6.26 | 7.87E-05  |
| ELP2        | -2.65 | -6.27 | 0.0002057 |
| GRB10       | -2.65 | -6.27 | 0.0003359 |
| IQGAP3      | -2.65 | -6.27 | 3.44E-05  |
| NEK2        | -2.65 | -6.27 | 9.02E-07  |
| STON1       | -2.65 | -6.27 | 0.001517  |
| UBE2G1      | -2.65 | -6.27 | 0.0043    |
| CEP68       | -2.65 | -6.28 | 4.17E-05  |
| CEPT1       | -2.65 | -6.28 | 0.003417  |
| DYNC1LI2    | -2.65 | -6.28 | 0.0009856 |
| HIC2        | -2.65 | -6.28 | 0.00146   |
| NUP35       | -2.65 | -6.28 | 0.001258  |
| SEC24C      | -2.65 | -6.28 | 0.002126  |
| SLC35E1     | -2.65 | -6.28 | 0.004073  |
| TRAF6       | -2.65 | -6.28 | 6.71E-05  |
| UGGT2       | -2.65 | -6.28 | 0.000433  |
| WASHC2C     | -2.65 | -6.28 | 0.002396  |
| DDX49       | -2.65 | -6.28 | 0.0001412 |

|           |       |       |           |
|-----------|-------|-------|-----------|
| MICALL1   | -2.65 | -6.28 | 0.004166  |
| NUP58     | -2.65 | -6.28 | 0.0004036 |
| SF3A1     | -2.65 | -6.28 | 0.000664  |
| SNRNP48   | -2.65 | -6.28 | 0.001637  |
| ASAP1     | -2.65 | -6.29 | 0.004232  |
| CCDC117   | -2.65 | -6.29 | 0.003067  |
| SKA3      | -2.65 | -6.29 | 9.67E-05  |
| DOCK10    | -2.66 | -6.30 | 0.0006196 |
| INTU      | -2.66 | -6.30 | 2.14E-05  |
| NUAK1     | -2.66 | -6.30 | 6.74E-06  |
| TPX2      | -2.66 | -6.30 | 1.53E-05  |
| U2SURP    | -2.66 | -6.30 | 0.0001236 |
| ZNF521    | -2.66 | -6.30 | 0.001437  |
| FAM107B   | -2.66 | -6.31 | 0.000559  |
| FZD6      | -2.66 | -6.31 | 0.003744  |
| MICU2     | -2.66 | -6.31 | 0.0002825 |
| PPP2R5E   | -2.66 | -6.31 | 0.001761  |
| SUGP2     | -2.66 | -6.31 | 0.0001545 |
| CLUH      | -2.66 | -6.32 | 1.84E-05  |
| GMPS      | -2.66 | -6.32 | 0.0004524 |
| IL1RAP    | -2.66 | -6.32 | 0.002657  |
| LOC419074 | -2.66 | -6.32 | 0.0002187 |
| PRIM1     | -2.66 | -6.32 | 0.0001731 |
| RAD1      | -2.66 | -6.32 | 0.00222   |
| TBC1D14   | -2.66 | -6.32 | 0.0006459 |
| WDR77     | -2.66 | -6.32 | 0.0001578 |
| IFNAR1    | -2.66 | -6.32 | 0.0005613 |
| SERPINH1  | -2.66 | -6.33 | 0.00056   |
| SPG11     | -2.66 | -6.33 | 0.0003442 |
| SRRM1     | -2.66 | -6.33 | 0.000139  |
| TRMT44    | -2.66 | -6.33 | 0.002634  |
| WDR82     | -2.66 | -6.33 | 0.002975  |
| WFS1      | -2.66 | -6.33 | 0.0005509 |
| ARHGAP42  | -2.66 | -6.34 | 0.0005539 |
| DDX3X     | -2.66 | -6.34 | 0.0009723 |
| WDR3      | -2.66 | -6.34 | 2.25E-05  |
| XRCC5     | -2.66 | -6.34 | 0.0001917 |
| ACACA     | -2.67 | -6.35 | 1.06E-05  |
| KIAA1524  | -2.67 | -6.35 | 1.70E-05  |
| KIAA2026  | -2.67 | -6.35 | 0.0006315 |
| SLC6A15   | -2.67 | -6.35 | 3.87E-05  |
| ZUFSP     | -2.67 | -6.35 | 0.001057  |
| BLM       | -2.67 | -6.36 | 0.0002013 |
| COPA      | -2.67 | -6.36 | 5.62E-05  |
| CUL3      | -2.67 | -6.36 | 0.0002569 |
| ORMDL3    | -2.67 | -6.36 | 0.00101   |
| RARB      | -2.67 | -6.36 | 0.0002842 |
| SCAI      | -2.67 | -6.36 | 0.0001915 |
| LTBP1     | -2.67 | -6.37 | 0.0003348 |
| SESN1     | -2.67 | -6.37 | 0.000142  |

|          |       |       |           |
|----------|-------|-------|-----------|
| SGMS2    | -2.67 | -6.37 | 0.0005896 |
| SUCLG2   | -2.67 | -6.37 | 0.0009614 |
| TMEM170A | -2.67 | -6.37 | 0.0002283 |
| WASHC5   | -2.67 | -6.37 | 0.0003681 |
| ATM      | -2.67 | -6.37 | 0.0002052 |
| GOLGA5   | -2.67 | -6.37 | 0.0001376 |
| LIN7C    | -2.67 | -6.37 | 0.0001368 |
| RINT1    | -2.67 | -6.37 | 0.0004107 |
| SPAST    | -2.67 | -6.37 | 0.0007026 |
| TOP2B    | -2.67 | -6.37 | 0.0002227 |
| USP40    | -2.67 | -6.37 | 0.00123   |
| YLPM1    | -2.67 | -6.37 | 1.01E-05  |
| ACADS    | -2.67 | -6.38 | 0.001415  |
| DNAJC21  | -2.67 | -6.38 | 0.002619  |
| DROSHA   | -2.67 | -6.38 | 0.001489  |
| HEATR1   | -2.67 | -6.38 | 3.26E-07  |
| HEXDC    | -2.67 | -6.38 | 0.0002975 |
| MSH6     | -2.67 | -6.38 | 5.68E-05  |
| NBR1     | -2.67 | -6.38 | 0.001215  |
| TCEANC   | -2.67 | -6.38 | 0.004754  |
| TROVE2   | -2.67 | -6.38 | 0.002801  |
| CDK8     | -2.68 | -6.39 | 0.003139  |
| COPG2    | -2.68 | -6.39 | 0.001063  |
| CXADR    | -2.68 | -6.39 | 2.12E-06  |
| KIAA1456 | -2.68 | -6.39 | 0.001141  |
| MCCC1    | -2.68 | -6.39 | 0.0002418 |
| PIGQ     | -2.68 | -6.39 | 0.0002562 |
| PTGFR    | -2.68 | -6.39 | 6.34E-05  |
| SELENOO  | -2.68 | -6.39 | 0.002537  |
| ACAP3    | -2.68 | -6.40 | 0.001821  |
| EZR      | -2.68 | -6.40 | 0.0001029 |
| NUP188   | -2.68 | -6.40 | 0.0001031 |
| AHNAK2   | -2.68 | -6.41 | 5.51E-09  |
| CEP57    | -2.68 | -6.41 | 0.000182  |
| LBH      | -2.68 | -6.41 | 0.003825  |
| MAP1LC3C | -2.68 | -6.41 | 5.67E-06  |
| MAP2K4   | -2.68 | -6.41 | 0.0003757 |
| METRNL   | -2.68 | -6.41 | 0.003938  |
| MSMO1    | -2.68 | -6.41 | 0.0002459 |
| NDUFS1   | -2.68 | -6.41 | 0.0002232 |
| SMYD4    | -2.68 | -6.41 | 0.004411  |
| SNAPC1   | -2.68 | -6.41 | 0.004236  |
| UGCG     | -2.68 | -6.41 | 3.39E-06  |
| ASTE1    | -2.68 | -6.41 | 1.13E-05  |
| ERCC4    | -2.68 | -6.41 | 4.29E-06  |
| GNAI3    | -2.68 | -6.41 | 0.002913  |
| GTF3C5   | -2.68 | -6.41 | 0.0002297 |
| PXDN     | -2.68 | -6.41 | 4.08E-07  |
| SEMA3D   | -2.68 | -6.41 | 0.0001254 |
| ABCB7    | -2.68 | -6.42 | 6.90E-05  |



|           |       |       |           |
|-----------|-------|-------|-----------|
| ACSL4     | -2.68 | -6.42 | 0.0001224 |
| ITGA1     | -2.68 | -6.42 | 0.004325  |
| PFKFB4L   | -2.68 | -6.42 | 0.0008178 |
| C1H3ORF38 | -2.69 | -6.43 | 0.002366  |
| CHPF      | -2.69 | -6.43 | 0.0003174 |
| LRRC28    | -2.69 | -6.43 | 0.003526  |
| MAD2L1    | -2.69 | -6.43 | 0.0003826 |
| NHLRC1    | -2.69 | -6.43 | 0.0005329 |
| TRMT6     | -2.69 | -6.43 | 0.0003804 |
| ZDHC15    | -2.69 | -6.43 | 0.0007142 |
| ZNF488    | -2.69 | -6.43 | 0.0009914 |
| FUT8      | -2.69 | -6.44 | 0.0006281 |
| SPRED2    | -2.69 | -6.44 | 0.0002207 |
| TTC14     | -2.69 | -6.44 | 0.0002116 |
| AP1AR     | -2.69 | -6.45 | 0.0004138 |
| CMTR2     | -2.69 | -6.45 | 0.002489  |
| R3HCC1    | -2.69 | -6.45 | 0.0004671 |
| ANKRD13C  | -2.69 | -6.46 | 0.002461  |
| FBLN2     | -2.69 | -6.46 | 7.81E-06  |
| GNAS      | -2.69 | -6.46 | 0.001128  |
| GRN       | -2.69 | -6.46 | 0.0001481 |
| PHF14     | -2.69 | -6.46 | 0.003579  |
| TMEM268   | -2.69 | -6.46 | 0.00112   |
| AGRN      | -2.69 | -6.46 | 1.59E-06  |
| BCL7A     | -2.69 | -6.46 | 4.05E-05  |
| GTDC1     | -2.69 | -6.46 | 0.0003876 |
| GTF3C1    | -2.69 | -6.46 | 0.0001428 |
| WDR1      | -2.69 | -6.46 | 0.001329  |
| YPEL2     | -2.69 | -6.46 | 0.000285  |
| CCSER1    | -2.69 | -6.47 | 7.97E-06  |
| LRP8      | -2.69 | -6.47 | 1.66E-06  |
| RHOBTB1   | -2.69 | -6.47 | 4.62E-07  |
| USP3      | -2.69 | -6.47 | 0.0003318 |
| CEP97     | -2.70 | -6.48 | 2.21E-05  |
| RGMA      | -2.70 | -6.48 | 0.0001597 |
| FBXW11    | -2.70 | -6.49 | 0.002276  |
| FMN1      | -2.70 | -6.49 | 0.0008123 |
| STX2      | -2.70 | -6.49 | 0.002978  |
| CEP85L    | -2.70 | -6.50 | 0.001087  |
| CLCN5     | -2.70 | -6.50 | 0.0005263 |
| APOOL     | -2.70 | -6.51 | 0.00349   |
| CTTNBP2NL | -2.70 | -6.51 | 0.0009693 |
| DUSP10    | -2.70 | -6.51 | 0.000843  |
| LOC416055 | -2.70 | -6.51 | 0.0003561 |
| TNFAIP8   | -2.70 | -6.51 | 0.001659  |
| EXOSC3    | -2.70 | -6.52 | 0.0001199 |
| PIK3C2A   | -2.70 | -6.52 | 7.20E-07  |
| PWWP2B    | -2.70 | -6.52 | 0.0005477 |
| RPP38     | -2.70 | -6.52 | 0.001377  |
| PAXBP1    | -2.71 | -6.52 | 0.0005127 |

|           |       |       |           |
|-----------|-------|-------|-----------|
| TGS1      | -2.71 | -6.52 | 6.44E-05  |
| TYW3      | -2.71 | -6.52 | 0.0002934 |
| VEZT      | -2.71 | -6.52 | 9.89E-05  |
| CCND3     | -2.71 | -6.53 | 6.26E-05  |
| FAR1      | -2.71 | -6.53 | 0.0005453 |
| ICE2      | -2.71 | -6.53 | 0.0002652 |
| MYBL1     | -2.71 | -6.53 | 5.78E-05  |
| SDE2      | -2.71 | -6.53 | 9.04E-05  |
| SLC9A3R2  | -2.71 | -6.53 | 0.0009165 |
| USP38     | -2.71 | -6.53 | 0.003555  |
| EDC3      | -2.71 | -6.54 | 8.18E-05  |
| PTCD3     | -2.71 | -6.54 | 0.0004897 |
| SMARCAD1  | -2.71 | -6.54 | 0.000189  |
| EXO1      | -2.71 | -6.55 | 6.05E-07  |
| TPRN      | -2.71 | -6.55 | 0.0002391 |
| TUBGCP6   | -2.71 | -6.55 | 0.0001154 |
| ERCC5     | -2.71 | -6.56 | 0.0005079 |
| FITM2     | -2.71 | -6.56 | 0.001458  |
| GRK4      | -2.71 | -6.56 | 0.0001451 |
| PTPRJ     | -2.71 | -6.56 | 3.87E-06  |
| RAB11FIP4 | -2.71 | -6.56 | 0.0002156 |
| TRAPPC12  | -2.71 | -6.56 | 0.001259  |
| TTF1      | -2.71 | -6.56 | 0.000127  |
| TXNDC11   | -2.71 | -6.56 | 0.002108  |
| ACKR3     | -2.72 | -6.57 | 0.000224  |
| AEBP2     | -2.72 | -6.57 | 0.002414  |
| AFAP1     | -2.72 | -6.57 | 0.0001337 |
| ANAPC5    | -2.72 | -6.57 | 1.19E-05  |
| EIPR1     | -2.72 | -6.57 | 0.0001532 |
| MOB1B     | -2.72 | -6.57 | 0.0002509 |
| MTIF2     | -2.72 | -6.57 | 0.002444  |
| PRPF6     | -2.72 | -6.57 | 0.0002707 |
| SMC4      | -2.72 | -6.57 | 2.68E-05  |
| URB1      | -2.72 | -6.57 | 6.66E-07  |
| CDC27     | -2.72 | -6.57 | 1.80E-05  |
| HSPA4     | -2.72 | -6.57 | 5.33E-05  |
| LDAH      | -2.72 | -6.57 | 0.0001687 |
| NGFR      | -2.72 | -6.57 | 1.70E-08  |
| PPP2R3A   | -2.72 | -6.57 | 0.0006702 |
| TAMM41    | -2.72 | -6.57 | 0.0001824 |
| ADRM1     | -2.72 | -6.58 | 0.002596  |
| CLOCK     | -2.72 | -6.58 | 0.0005412 |
| DPH3P1    | -2.72 | -6.58 | 0.0001983 |
| EXOC8     | -2.72 | -6.58 | 0.001885  |
| MMAA      | -2.72 | -6.58 | 0.001477  |
| NSMCE4A   | -2.72 | -6.58 | 0.0007094 |
| PMS2      | -2.72 | -6.58 | 0.001928  |
| SLC35A2   | -2.72 | -6.58 | 0.0001843 |
| TP53BP1   | -2.72 | -6.58 | 8.66E-05  |
| AMACR     | -2.72 | -6.59 | 0.002742  |

|             |       |       |           |
|-------------|-------|-------|-----------|
| HAUS3       | -2.72 | -6.59 | 8.57E-07  |
| MYH9        | -2.72 | -6.59 | 5.55E-06  |
| NOTUM       | -2.72 | -6.59 | 0.0001025 |
| RRP1B       | -2.72 | -6.59 | 0.0006185 |
| WDR7        | -2.72 | -6.59 | 0.0001448 |
| CCDC51      | -2.72 | -6.60 | 0.003878  |
| CDYL2       | -2.72 | -6.60 | 0.00228   |
| RIN3        | -2.72 | -6.60 | 0.0003553 |
| TRIP11      | -2.72 | -6.60 | 3.99E-06  |
| ANAPC10     | -2.72 | -6.61 | 0.002003  |
| DDB1        | -2.72 | -6.61 | 3.50E-06  |
| SMARCD3     | -2.72 | -6.61 | 8.71E-06  |
| B3GALT6     | -2.73 | -6.62 | 0.002222  |
| FIGNL1      | -2.73 | -6.62 | 0.0007656 |
| CLASP1      | -2.73 | -6.63 | 0.0003457 |
| FBXO34      | -2.73 | -6.63 | 0.001745  |
| P3H4        | -2.73 | -6.63 | 4.98E-05  |
| RAB9A       | -2.73 | -6.63 | 0.000831  |
| STIM2       | -2.73 | -6.63 | 0.0003678 |
| USP28       | -2.73 | -6.63 | 8.17E-05  |
| MYH15       | -2.73 | -6.64 | 6.86E-08  |
| RFT1        | -2.73 | -6.64 | 4.31E-05  |
| LTN1        | -2.73 | -6.64 | 0.0006812 |
| NCAPG       | -2.73 | -6.64 | 2.29E-06  |
| PLEKHG4     | -2.73 | -6.64 | 1.41E-05  |
| POC1A       | -2.73 | -6.64 | 0.0004274 |
| RPP40       | -2.73 | -6.64 | 0.001039  |
| TBC1D8      | -2.73 | -6.64 | 4.76E-06  |
| INPP5B      | -2.73 | -6.65 | 0.002385  |
| MIR92A1     | -2.73 | -6.65 | 1.95E-08  |
| ORC2        | -2.73 | -6.65 | 5.81E-06  |
| PRICKLE2    | -2.73 | -6.65 | 0.0007976 |
| ZNF451      | -2.73 | -6.65 | 0.003528  |
| DIP2A       | -2.74 | -6.66 | 0.001141  |
| MYO10       | -2.74 | -6.66 | 1.30E-06  |
| NIN         | -2.74 | -6.66 | 3.73E-06  |
| ALDH18A1    | -2.74 | -6.67 | 0.0001778 |
| ANKRD28     | -2.74 | -6.67 | 0.004311  |
| ARHGAP12    | -2.74 | -6.67 | 4.81E-06  |
| DENND4C     | -2.74 | -6.67 | 3.88E-05  |
| MIOS        | -2.74 | -6.67 | 0.001741  |
| OSBPL11     | -2.74 | -6.67 | 0.001598  |
| PREP        | -2.74 | -6.67 | 4.77E-05  |
| ZNF217      | -2.74 | -6.67 | 0.0001919 |
| C11H16orf70 | -2.74 | -6.68 | 0.0004324 |
| FLCN        | -2.74 | -6.68 | 0.004255  |
| GGNBP2      | -2.74 | -6.68 | 0.0001122 |
| LPCAT1      | -2.74 | -6.68 | 0.0007662 |
| PIGG        | -2.74 | -6.68 | 0.0007912 |
| SF3B1       | -2.74 | -6.68 | 0.0002461 |

|         |       |       |           |
|---------|-------|-------|-----------|
| SLC39A8 | -2.74 | -6.68 | 9.72E-05  |
| PBX3    | -2.74 | -6.69 | 0.001397  |
| PUS10   | -2.74 | -6.69 | 0.0009918 |
| SLC9A7  | -2.74 | -6.69 | 5.12E-05  |
| YIPF6   | -2.74 | -6.69 | 0.0003807 |
| DDX42   | -2.74 | -6.70 | 4.37E-05  |
| MADD    | -2.74 | -6.70 | 0.002963  |
| RAD21   | -2.74 | -6.70 | 0.001902  |
| RAD54B  | -2.74 | -6.70 | 0.0001654 |
| TBC1D8B | -2.74 | -6.70 | 0.0007652 |
| TRIP13  | -2.74 | -6.70 | 0.0001003 |
| CCDC15  | -2.75 | -6.71 | 0.0003117 |
| FPGT    | -2.75 | -6.71 | 0.005175  |
| FTSJ3   | -2.75 | -6.71 | 8.51E-06  |
| LIPT1   | -2.75 | -6.71 | 0.00258   |
| SETD6   | -2.75 | -6.71 | 0.0003591 |
| SPDL1   | -2.75 | -6.71 | 0.0001847 |
| TBCD    | -2.75 | -6.71 | 8.69E-05  |
| PDCD2L  | -2.75 | -6.71 | 0.0002669 |
| PHAX    | -2.75 | -6.71 | 0.001852  |
| SMC2    | -2.75 | -6.71 | 1.88E-06  |
| CPT2    | -2.75 | -6.72 | 0.005134  |
| SRFBP1  | -2.75 | -6.72 | 0.002969  |
| CNEP1R1 | -2.75 | -6.73 | 0.00193   |
| CNOT2   | -2.75 | -6.73 | 0.0006898 |
| RANGAP1 | -2.75 | -6.73 | 6.10E-05  |
| ZNF518B | -2.75 | -6.73 | 8.92E-07  |
| CENPT   | -2.75 | -6.74 | 3.30E-05  |
| DLGAP5  | -2.75 | -6.74 | 2.92E-05  |
| PTPRD   | -2.75 | -6.74 | 6.43E-06  |
| TMOD3   | -2.75 | -6.74 | 2.10E-05  |
| BCAS3   | -2.75 | -6.75 | 0.0001878 |
| NUMB    | -2.75 | -6.75 | 3.05E-05  |
| INSIG1  | -2.76 | -6.76 | 2.59E-06  |
| MLLT10  | -2.76 | -6.76 | 9.95E-05  |
| ITPR3   | -2.76 | -6.77 | 2.60E-05  |
| KDM2B   | -2.76 | -6.77 | 8.11E-06  |
| PENK    | -2.76 | -6.77 | 1.35E-08  |
| ALG1    | -2.76 | -6.78 | 0.001114  |
| BEND3   | -2.76 | -6.78 | 0.000451  |
| SLC12A4 | -2.76 | -6.78 | 7.53E-06  |
| UBA6    | -2.76 | -6.78 | 0.001901  |
| ABHD4   | -2.76 | -6.79 | 7.03E-05  |
| CAV2    | -2.76 | -6.79 | 0.000151  |
| DYNC1H1 | -2.76 | -6.79 | 1.39E-05  |
| LONP1   | -2.76 | -6.79 | 0.0008547 |
| MSANTD2 | -2.76 | -6.79 | 0.001696  |
| RPP25L  | -2.76 | -6.79 | 0.003589  |
| TFDP2   | -2.76 | -6.79 | 0.0004825 |
| NAV2    | -2.76 | -6.79 | 3.61E-05  |

|          |       |       |           |
|----------|-------|-------|-----------|
| NDC80    | -2.76 | -6.79 | 4.20E-05  |
| LAMP2    | -2.77 | -6.80 | 0.0001355 |
| MPP7     | -2.77 | -6.80 | 2.80E-05  |
| SGK1     | -2.77 | -6.80 | 0.0005245 |
| DNAJB9   | -2.77 | -6.81 | 0.001286  |
| KIF26A   | -2.77 | -6.81 | 0.0001252 |
| BACH1    | -2.77 | -6.82 | 0.0004507 |
| GEN1     | -2.77 | -6.82 | 0.0005672 |
| SNN      | -2.77 | -6.82 | 0.0002035 |
| ESYT2    | -2.77 | -6.83 | 0.0001205 |
| EXOSC9   | -2.77 | -6.83 | 3.95E-05  |
| HLF      | -2.77 | -6.83 | 0.0003171 |
| MARS2    | -2.77 | -6.83 | 0.000279  |
| NCAPH    | -2.77 | -6.83 | 1.02E-05  |
| UBE4B    | -2.77 | -6.83 | 5.49E-05  |
| WBP2     | -2.77 | -6.83 | 3.52E-05  |
| PRELP    | -2.77 | -6.84 | 0.0002607 |
| TFB2M    | -2.77 | -6.84 | 0.0002985 |
| ARL16    | -2.78 | -6.85 | 9.18E-05  |
| NABP1    | -2.78 | -6.85 | 0.0004031 |
| POLR3H   | -2.78 | -6.85 | 8.35E-05  |
| RAB35    | -2.78 | -6.85 | 0.003517  |
| WDR35    | -2.78 | -6.85 | 2.75E-05  |
| CDC23    | -2.78 | -6.86 | 6.41E-06  |
| CENPJ    | -2.78 | -6.86 | 1.45E-05  |
| LAMA1    | -2.78 | -6.86 | 3.51E-06  |
| LSM14A   | -2.78 | -6.86 | 0.0005028 |
| SRPK2    | -2.78 | -6.86 | 0.0002476 |
| GSDME    | -2.78 | -6.87 | 0.001004  |
| IARS     | -2.78 | -6.87 | 3.91E-05  |
| NBAS     | -2.78 | -6.87 | 2.39E-05  |
| UBE2K    | -2.78 | -6.87 | 0.0003131 |
| ABHD17B  | -2.78 | -6.88 | 0.001364  |
| DDX6     | -2.78 | -6.88 | 1.54E-05  |
| DPH1     | -2.78 | -6.88 | 7.88E-05  |
| MCM3     | -2.78 | -6.88 | 7.31E-06  |
| RACGAP1  | -2.78 | -6.88 | 1.25E-05  |
| RBM15B   | -2.78 | -6.88 | 0.001815  |
| VPS11    | -2.78 | -6.88 | 0.002866  |
| ARFGEF2  | -2.78 | -6.89 | 1.29E-05  |
| ARHGAP10 | -2.78 | -6.89 | 0.003902  |
| ATF7IP   | -2.78 | -6.89 | 4.35E-05  |
| CCNB2    | -2.78 | -6.89 | 7.05E-06  |
| DCAF4    | -2.78 | -6.89 | 0.0004943 |
| UBE2QL1  | -2.78 | -6.89 | 0.0003105 |
| ARID1B   | -2.79 | -6.90 | 0.0002797 |
| BRCA2    | -2.79 | -6.90 | 6.66E-06  |
| MAML1    | -2.79 | -6.90 | 0.004384  |
| PPP1R21  | -2.79 | -6.90 | 0.002656  |
| MTFR2    | -2.79 | -6.90 | 0.0003323 |

|          |       |       |           |
|----------|-------|-------|-----------|
| ALG2     | -2.79 | -6.91 | 0.003453  |
| CD36     | -2.79 | -6.91 | 1.65E-07  |
| KRT19    | -2.79 | -6.91 | 1.53E-05  |
| TARDBP   | -2.79 | -6.92 | 7.23E-05  |
| ZFYVE21  | -2.79 | -6.92 | 0.001374  |
| PRORSD1P | -2.79 | -6.93 | 0.004203  |
| SETD5    | -2.79 | -6.93 | 0.0002184 |
| DEPDC1B  | -2.80 | -6.94 | 9.20E-05  |
| GPC4     | -2.80 | -6.94 | 6.23E-05  |
| PHLDB2   | -2.80 | -6.94 | 6.68E-06  |
| PRPF8    | -2.80 | -6.94 | 7.82E-06  |
| SKIV2L2  | -2.80 | -6.94 | 0.0001196 |
| CBLL1    | -2.80 | -6.95 | 0.001027  |
| CLCN4    | -2.80 | -6.95 | 0.0002093 |
| FANCF    | -2.80 | -6.95 | 6.19E-06  |
| GPATCH2L | -2.80 | -6.95 | 0.0001574 |
| SEC22A   | -2.80 | -6.95 | 0.001544  |
| SPATS2L  | -2.80 | -6.95 | 0.0001397 |
| TMEM26   | -2.80 | -6.95 | 0.0002288 |
| USO1     | -2.80 | -6.95 | 1.29E-05  |
| GATD1    | -2.80 | -6.96 | 0.0005406 |
| LIG3     | -2.80 | -6.96 | 0.0002042 |
| MED18    | -2.80 | -6.96 | 0.002664  |
| AGL      | -2.80 | -6.97 | 1.44E-07  |
| ARID5B   | -2.80 | -6.97 | 0.0002014 |
| CENPN    | -2.80 | -6.97 | 8.54E-05  |
| CUL4A    | -2.80 | -6.97 | 0.002673  |
| PACSIN2  | -2.80 | -6.97 | 0.0003612 |
| THBS1    | -2.80 | -6.97 | 3.23E-07  |
| ZHX1     | -2.80 | -6.97 | 0.002614  |
| NDE1     | -2.80 | -6.98 | 0.0001111 |
| ITGA6    | -2.80 | -6.99 | 3.09E-06  |
| MTRF1L   | -2.80 | -6.99 | 0.0005141 |
| LSS      | -2.81 | -7.00 | 8.50E-06  |
| SNIP1    | -2.81 | -7.00 | 0.001162  |
| SRPX2    | -2.81 | -7.00 | 4.85E-07  |
| CCNA2    | -2.81 | -7.01 | 5.15E-05  |
| GLDC     | -2.81 | -7.01 | 0.0003232 |
| PATJ     | -2.81 | -7.01 | 0.001485  |
| SMAD3    | -2.81 | -7.01 | 4.26E-05  |
| TMLHE    | -2.81 | -7.01 | 0.0001554 |
| AQR      | -2.81 | -7.02 | 5.62E-05  |
| DUSP6    | -2.81 | -7.02 | 9.21E-06  |
| NUP85    | -2.81 | -7.02 | 0.0002727 |
| SRL      | -2.81 | -7.02 | 1.98E-09  |
| ABCB10   | -2.81 | -7.03 | 7.00E-05  |
| RND3     | -2.81 | -7.03 | 0.0001536 |
| RYBP     | -2.81 | -7.03 | 0.001152  |
| TTK      | -2.81 | -7.03 | 5.96E-06  |
| ATF2     | -2.81 | -7.04 | 0.0003923 |

|          |       |       |           |
|----------|-------|-------|-----------|
| SOCS5    | -2.82 | -7.05 | 1.15E-05  |
| TMEM171  | -2.82 | -7.05 | 0.0001427 |
| MYBBP1A  | -2.82 | -7.05 | 7.16E-07  |
| EYA2     | -2.82 | -7.06 | 0.001294  |
| LEO1     | -2.82 | -7.06 | 2.64E-05  |
| SLC25A46 | -2.82 | -7.06 | 0.0001024 |
| ZCRB1    | -2.82 | -7.06 | 0.004148  |
| BDP1L    | -2.82 | -7.07 | 0.0005104 |
| DIRC2    | -2.82 | -7.07 | 2.31E-05  |
| RABGGTB  | -2.82 | -7.07 | 1.07E-05  |
| TTC30B   | -2.82 | -7.07 | 0.0009576 |
| GARNL3   | -2.82 | -7.08 | 0.0002701 |
| PELI1    | -2.82 | -7.08 | 0.0003164 |
| REST     | -2.82 | -7.08 | 0.0007327 |
| RNF111   | -2.82 | -7.08 | 0.0006152 |
| STRBP    | -2.82 | -7.08 | 0.0001488 |
| TBC1D23  | -2.82 | -7.08 | 7.59E-07  |
| VIP      | -2.82 | -7.08 | 1.24E-07  |
| WASHC4   | -2.82 | -7.08 | 5.85E-05  |
| YY1      | -2.82 | -7.08 | 0.002466  |
| METTL16  | -2.83 | -7.09 | 0.0009659 |
| ARID1A   | -2.83 | -7.10 | 0.0006882 |
| BET1     | -2.83 | -7.10 | 0.0003909 |
| EMC8     | -2.83 | -7.10 | 0.0002233 |
| MXD1     | -2.83 | -7.10 | 8.60E-06  |
| NDST2    | -2.83 | -7.10 | 0.0004602 |
| PLA2R1   | -2.83 | -7.10 | 0.0006214 |
| POP1     | -2.83 | -7.10 | 1.95E-06  |
| TASP1    | -2.83 | -7.10 | 2.87E-05  |
| ZDHHC14  | -2.83 | -7.10 | 0.001407  |
| MON2     | -2.83 | -7.11 | 2.15E-06  |
| RBM17    | -2.83 | -7.11 | 0.000125  |
| SLC38A1  | -2.83 | -7.11 | 7.44E-07  |
| CTCFL    | -2.83 | -7.12 | 0.0001549 |
| ITPR2    | -2.83 | -7.12 | 8.73E-05  |
| PDPK1    | -2.83 | -7.12 | 0.001139  |
| FBXO32   | -2.83 | -7.13 | 7.14E-07  |
| KIN      | -2.83 | -7.13 | 4.07E-05  |
| NPC1     | -2.83 | -7.13 | 0.0001984 |
| PCM1     | -2.83 | -7.13 | 0.0007745 |
| MED4     | -2.84 | -7.15 | 0.002216  |
| TBK1     | -2.84 | -7.15 | 0.0006056 |
| PPRC1    | -2.84 | -7.17 | 2.85E-07  |
| UBR3     | -2.84 | -7.17 | 0.0003369 |
| ATP1A1   | -2.84 | -7.18 | 0.0001645 |
| DCAF7    | -2.84 | -7.18 | 0.0004643 |
| HS6ST2   | -2.84 | -7.18 | 0.0004798 |
| MTUS1    | -2.84 | -7.18 | 2.52E-05  |
| KNTC1    | -2.85 | -7.19 | 4.40E-06  |
| MED27    | -2.85 | -7.19 | 0.001933  |

|             |       |       |           |
|-------------|-------|-------|-----------|
| MKX         | -2.85 | -7.19 | 7.07E-05  |
| TSEN2       | -2.85 | -7.19 | 0.0007605 |
| ECD         | -2.85 | -7.20 | 4.01E-05  |
| FAM135A     | -2.85 | -7.20 | 2.74E-05  |
| AP1S2       | -2.85 | -7.21 | 3.26E-05  |
| BNC1        | -2.85 | -7.21 | 2.66E-05  |
| FLNB        | -2.85 | -7.21 | 4.13E-07  |
| PRMT3       | -2.85 | -7.21 | 3.32E-05  |
| EPRS        | -2.85 | -7.22 | 3.74E-07  |
| NDNF        | -2.85 | -7.22 | 4.78E-05  |
| PIP4P2      | -2.85 | -7.22 | 0.001308  |
| XRCC3       | -2.85 | -7.22 | 0.0003445 |
| AHR         | -2.85 | -7.23 | 4.70E-06  |
| ARHGAP19    | -2.85 | -7.23 | 2.40E-07  |
| KBTBD2      | -2.85 | -7.23 | 0.0006397 |
| AMMECR1L    | -2.86 | -7.24 | 0.001717  |
| MCU         | -2.86 | -7.24 | 7.55E-06  |
| PHF6        | -2.86 | -7.24 | 0.002581  |
| ALG11       | -2.86 | -7.25 | 0.0009213 |
| DPH5        | -2.86 | -7.25 | 0.001425  |
| MTHFD2      | -2.86 | -7.25 | 1.70E-06  |
| TIA1        | -2.86 | -7.25 | 0.0001621 |
| ATP2A2      | -2.86 | -7.26 | 1.14E-05  |
| PI4KA       | -2.86 | -7.26 | 7.88E-05  |
| THAP12      | -2.86 | -7.26 | 8.77E-06  |
| TRIM24      | -2.86 | -7.26 | 6.33E-07  |
| ALG8        | -2.86 | -7.27 | 0.0001595 |
| NOVA1       | -2.86 | -7.27 | 0.0003354 |
| TARS        | -2.86 | -7.27 | 3.49E-05  |
| BRPF3       | -2.86 | -7.28 | 0.0001352 |
| FEZ2        | -2.86 | -7.28 | 0.000289  |
| SLC7A6OS    | -2.86 | -7.28 | 0.0005405 |
| HTRA3       | -2.87 | -7.29 | 0.0002491 |
| KIAA0408    | -2.87 | -7.29 | 3.97E-05  |
| C9H3orf58   | -2.87 | -7.30 | 1.85E-08  |
| DOCK9       | -2.87 | -7.30 | 2.66E-05  |
| HDAC9       | -2.87 | -7.30 | 6.02E-06  |
| ING3        | -2.87 | -7.30 | 0.0002887 |
| MFSD2A      | -2.87 | -7.30 | 1.01E-05  |
| CH507-9B2.5 | -2.87 | -7.31 | 4.37E-08  |
| CRYBG3      | -2.87 | -7.31 | 0.0003814 |
| OXR1        | -2.87 | -7.31 | 0.001496  |
| SLC24A5     | -2.87 | -7.31 | 1.35E-06  |
| PYROXD1     | -2.87 | -7.32 | 0.0001707 |
| SLC2A1      | -2.87 | -7.32 | 2.08E-05  |
| ANK3        | -2.88 | -7.34 | 0.0004088 |
| LOC420915   | -2.88 | -7.34 | 3.97E-07  |
| NPAT        | -2.88 | -7.34 | 6.28E-06  |
| RECQL       | -2.88 | -7.34 | 6.30E-05  |
| SMC3        | -2.88 | -7.34 | 6.91E-05  |



|           |       |       |           |
|-----------|-------|-------|-----------|
| CWC25     | -2.88 | -7.35 | 2.55E-05  |
| HTATSF1   | -2.88 | -7.35 | 0.0001563 |
| KLF3      | -2.88 | -7.35 | 4.01E-05  |
| NRP1      | -2.88 | -7.35 | 2.92E-06  |
| CDC37L1   | -2.88 | -7.36 | 0.0001071 |
| MTMR3     | -2.88 | -7.36 | 0.0007754 |
| SLC30A1   | -2.88 | -7.36 | 0.0005064 |
| C7H2ORF69 | -2.88 | -7.37 | 0.0001135 |
| FBXO3     | -2.88 | -7.37 | 7.03E-05  |
| METAP1    | -2.88 | -7.37 | 7.35E-07  |
| PNRC2     | -2.88 | -7.38 | 7.86E-05  |
| GARS      | -2.89 | -7.39 | 4.76E-05  |
| GRAMD1C   | -2.89 | -7.39 | 9.25E-05  |
| GTF2H2    | -2.89 | -7.39 | 0.0001062 |
| INTS7     | -2.89 | -7.39 | 2.13E-05  |
| KIF2C     | -2.89 | -7.39 | 7.82E-06  |
| APCDD1L   | -2.89 | -7.40 | 4.30E-06  |
| DSCC1     | -2.89 | -7.40 | 1.98E-05  |
| FKBP5     | -2.89 | -7.40 | 0.000586  |
| JADE3     | -2.89 | -7.40 | 7.20E-05  |
| NOL10     | -2.89 | -7.40 | 9.24E-06  |
| TOM1L2    | -2.89 | -7.40 | 0.0002807 |
| CENPI     | -2.89 | -7.41 | 3.01E-08  |
| DCUN1D1   | -2.89 | -7.41 | 0.0001684 |
| MPDZ      | -2.89 | -7.41 | 7.23E-05  |
| NDEL1     | -2.89 | -7.41 | 0.0002036 |
| RIC1      | -2.89 | -7.41 | 0.0008321 |
| SPRY2     | -2.89 | -7.41 | 5.38E-06  |
| TICAM1    | -2.89 | -7.41 | 0.0009297 |
| TNFAIP8L1 | -2.89 | -7.41 | 1.11E-05  |
| TRIM37    | -2.89 | -7.41 | 9.97E-06  |
| PCGF6     | -2.89 | -7.42 | 0.0003547 |
| C5H14orf4 | -2.89 | -7.43 | 0.0001724 |
| DTNBP1    | -2.89 | -7.43 | 0.0001335 |
| LACTB2    | -2.90 | -7.45 | 0.0006108 |
| MYNN      | -2.90 | -7.45 | 0.0006287 |
| NCAPG2    | -2.90 | -7.45 | 5.17E-06  |
| TXNRD2    | -2.90 | -7.45 | 6.14E-05  |
| ATAD2     | -2.90 | -7.46 | 1.70E-05  |
| DGCR2     | -2.90 | -7.46 | 4.58E-05  |
| TRMT10C   | -2.90 | -7.46 | 0.0001913 |
| ACO1      | -2.90 | -7.47 | 1.73E-05  |
| GIN3      | -2.90 | -7.47 | 0.001724  |
| RELCH     | -2.90 | -7.47 | 5.27E-06  |
| TUBB4B    | -2.90 | -7.47 | 0.000112  |
| GOSR1     | -2.90 | -7.48 | 0.0009765 |
| LMTK2     | -2.90 | -7.48 | 9.41E-05  |
| MSH2      | -2.90 | -7.48 | 1.35E-05  |
| SLC38A2   | -2.90 | -7.48 | 2.23E-10  |
| ZNF639    | -2.90 | -7.48 | 0.00102   |

|          |       |       |           |
|----------|-------|-------|-----------|
| PGP      | -2.91 | -7.50 | 3.94E-05  |
| CLTC     | -2.91 | -7.51 | 1.60E-05  |
| DENND2A  | -2.91 | -7.51 | 1.56E-05  |
| APPL2    | -2.91 | -7.52 | 1.07E-05  |
| FAM83D   | -2.91 | -7.52 | 4.91E-07  |
| HAUS8    | -2.91 | -7.52 | 3.03E-05  |
| IVNS1ABP | -2.91 | -7.52 | 4.16E-05  |
| PPP1R3B  | -2.91 | -7.52 | 0.0001784 |
| TMEM177  | -2.91 | -7.52 | 0.0002227 |
| NOTCH1   | -2.91 | -7.53 | 7.88E-06  |
| UBXN2B   | -2.91 | -7.54 | 5.13E-05  |
| ARGLU1   | -2.92 | -7.55 | 1.47E-05  |
| FNDC3B   | -2.92 | -7.55 | 2.56E-07  |
| NECTIN3  | -2.92 | -7.55 | 1.02E-05  |
| PLCE1    | -2.92 | -7.55 | 5.25E-06  |
| INTS1    | -2.92 | -7.57 | 6.58E-06  |
| NUP155   | -2.92 | -7.57 | 4.06E-06  |
| TECPR2   | -2.92 | -7.57 | 0.0002049 |
| CITED4   | -2.92 | -7.59 | 3.85E-06  |
| CNOT10   | -2.92 | -7.59 | 7.35E-05  |
| MAP4K3   | -2.92 | -7.59 | 0.0002099 |
| SIPA1L1  | -2.92 | -7.59 | 6.06E-05  |
| ETAA1    | -2.93 | -7.60 | 7.04E-05  |
| FAM76B   | -2.93 | -7.60 | 5.08E-06  |
| HTRA1    | -2.93 | -7.60 | 5.29E-07  |
| TTC7B    | -2.93 | -7.62 | 2.89E-05  |
| CHORDC1  | -2.93 | -7.63 | 2.76E-06  |
| KLHL20   | -2.93 | -7.63 | 0.0002324 |
| ATP5A1Z  | -2.94 | -7.65 | 1.26E-06  |
| BTRC     | -2.94 | -7.65 | 5.25E-05  |
| CDC42EP3 | -2.94 | -7.65 | 3.04E-05  |
| PEX1     | -2.94 | -7.65 | 6.71E-06  |
| SPATA7   | -2.94 | -7.67 | 4.28E-06  |
| ADM      | -2.94 | -7.69 | 9.36E-06  |
| HNRNPDL  | -2.94 | -7.69 | 1.42E-05  |
| PDCD11   | -2.94 | -7.69 | 7.85E-06  |
| FLVCR1   | -2.95 | -7.71 | 1.25E-05  |
| PLK2     | -2.95 | -7.71 | 1.17E-06  |
| PTPN13   | -2.95 | -7.71 | 1.69E-06  |
| VCL      | -2.95 | -7.71 | 7.56E-09  |
| RAB40B   | -2.95 | -7.72 | 0.001347  |
| PRPF4B   | -2.95 | -7.73 | 4.32E-05  |
| WDR11    | -2.95 | -7.73 | 3.57E-05  |
| YARS2    | -2.95 | -7.73 | 1.47E-05  |
| PPHLN1   | -2.95 | -7.74 | 5.69E-06  |
| PPP1R8   | -2.95 | -7.74 | 5.62E-05  |
| MELK     | -2.95 | -7.75 | 2.52E-06  |
| OSBPL6   | -2.95 | -7.75 | 1.38E-05  |
| DACT1    | -2.96 | -7.76 | 4.15E-08  |
| HERC4    | -2.96 | -7.76 | 0.0002036 |

|          |       |       |           |
|----------|-------|-------|-----------|
| KLHL26   | -2.96 | -7.77 | 2.74E-05  |
| NPR3     | -2.96 | -7.79 | 3.03E-08  |
| RHOB     | -2.96 | -7.79 | 0.0001052 |
| TOE1     | -2.96 | -7.79 | 1.30E-05  |
| ID4      | -2.96 | -7.81 | 2.65E-06  |
| PDZRN3   | -2.96 | -7.81 | 2.18E-07  |
| PRKCB    | -2.96 | -7.81 | 0.0008867 |
| TGIF1    | -2.96 | -7.81 | 9.24E-07  |
| SUPT7L   | -2.97 | -7.82 | 8.03E-06  |
| CENPL    | -2.97 | -7.83 | 2.82E-05  |
| ISM1     | -2.97 | -7.83 | 1.83E-07  |
| SRSF5    | -2.97 | -7.83 | 0.0001277 |
| FOXN3    | -2.97 | -7.84 | 0.0001932 |
| LONP2    | -2.97 | -7.84 | 9.24E-05  |
| MFSD14B  | -2.97 | -7.84 | 1.41E-05  |
| TRIM59   | -2.97 | -7.84 | 0.0002493 |
| DNAAF5   | -2.97 | -7.85 | 1.30E-06  |
| E2F8     | -2.97 | -7.85 | 5.90E-06  |
| NOC3L    | -2.97 | -7.85 | 1.09E-06  |
| NOV      | -2.97 | -7.85 | 0.000218  |
| SFRP2    | -2.97 | -7.85 | 4.83E-09  |
| ETV5     | -2.98 | -7.88 | 6.43E-05  |
| MIR1600  | -2.98 | -7.89 | 1.13E-05  |
| LIPG     | -2.98 | -7.90 | 3.81E-06  |
| PINK1    | -2.98 | -7.90 | 7.33E-06  |
| CLK3     | -2.98 | -7.91 | 2.65E-05  |
| INTS4    | -2.98 | -7.91 | 0.0001727 |
| LRRC49   | -2.98 | -7.91 | 3.26E-05  |
| PCSK5    | -2.99 | -7.92 | 4.00E-06  |
| RMI1     | -2.99 | -7.92 | 0.0003206 |
| SGO1     | -2.99 | -7.94 | 6.95E-08  |
| HMGCS1   | -2.99 | -7.95 | 3.30E-06  |
| RGS2     | -2.99 | -7.95 | 9.31E-07  |
| DCP1B    | -2.99 | -7.97 | 2.75E-05  |
| ESS2     | -2.99 | -7.97 | 0.0002158 |
| ICE1     | -2.99 | -7.97 | 9.65E-06  |
| SPART    | -2.99 | -7.97 | 1.60E-05  |
| TNFRSF1A | -2.99 | -7.97 | 0.0002494 |
| RAB22A   | -3.00 | -7.98 | 6.61E-05  |
| ZBED1    | -3.00 | -7.98 | 1.50E-05  |
| MYH10    | -3.00 | -7.99 | 1.16E-06  |
| LETM2    | -3.00 | -8.00 | 9.27E-06  |
| RMND5A   | -3.00 | -8.00 | 0.0002009 |
| RTTN     | -3.00 | -8.00 | 3.82E-07  |
| ZFYVE26  | -3.00 | -8.00 | 1.33E-06  |
| NFYA     | -3.00 | -8.01 | 4.71E-06  |
| HMGB2    | -3.00 | -8.02 | 4.99E-07  |
| ANKRD13A | -3.01 | -8.04 | 6.12E-06  |
| MTX3     | -3.01 | -8.06 | 4.15E-06  |
| RRP7A    | -3.01 | -8.07 | 3.11E-05  |

|         |       |       |          |
|---------|-------|-------|----------|
| FDPS    | -3.01 | -8.08 | 1.33E-05 |
| HSD17B7 | -3.01 | -8.08 | 6.09E-06 |
| ARMC6   | -3.02 | -8.11 | 1.19E-05 |
| COQ8B   | -3.02 | -8.11 | 5.67E-06 |
| DAB2IP  | -3.02 | -8.11 | 1.73E-05 |
| FBXL5   | -3.02 | -8.11 | 3.63E-05 |
| HMGCR   | -3.02 | -8.12 | 4.58E-09 |
| SGPL1   | -3.02 | -8.12 | 0.000101 |
| ACTR5   | -3.02 | -8.13 | 1.96E-06 |
| ITGA9   | -3.02 | -8.13 | 8.56E-06 |
| VCAN    | -3.02 | -8.13 | 2.32E-07 |
| CPNE3   | -3.03 | -8.14 | 2.22E-07 |
| FGFBP1  | -3.03 | -8.15 | 5.36E-07 |
| PTPN14  | -3.03 | -8.16 | 2.50E-06 |
| PDP1    | -3.03 | -8.18 | 4.03E-05 |
| FDFT1   | -3.03 | -8.19 | 1.58E-07 |
| IARS2   | -3.04 | -8.20 | 8.24E-05 |
| CRLF1   | -3.04 | -8.21 | 2.72E-06 |
| CSF1R   | -3.04 | -8.21 | 1.71E-12 |
| GLT1D1  | -3.04 | -8.21 | 1.47E-05 |
| RSF1    | -3.04 | -8.24 | 5.99E-07 |
| SOCS4   | -3.04 | -8.24 | 2.59E-06 |
| ACAP2   | -3.04 | -8.25 | 2.06E-05 |
| IREB2   | -3.04 | -8.25 | 1.35E-05 |
| EIF2AK3 | -3.05 | -8.27 | 1.89E-09 |
| FCHSD2  | -3.05 | -8.27 | 4.14E-07 |
| MED14   | -3.05 | -8.27 | 1.02E-05 |
| FZD3    | -3.05 | -8.28 | 4.01E-06 |
| SPATA13 | -3.05 | -8.28 | 6.32E-06 |
| ATR     | -3.05 | -8.30 | 2.54E-08 |
| NSDHL   | -3.05 | -8.30 | 4.33E-06 |
| BCAR1   | -3.06 | -8.32 | 7.78E-07 |
| BTBD3   | -3.06 | -8.32 | 1.53E-05 |
| FGFRL1  | -3.06 | -8.32 | 1.56E-05 |
| MAN1A1  | -3.06 | -8.33 | 9.90E-06 |
| NOM1    | -3.06 | -8.35 | 8.65E-06 |
| SEC16A  | -3.06 | -8.35 | 5.67E-06 |
| MYC     | -3.07 | -8.37 | 4.14E-06 |
| CEBPB   | -3.07 | -8.38 | 5.19E-06 |
| LRCH2   | -3.07 | -8.38 | 6.09E-07 |
| SEC22C  | -3.07 | -8.38 | 2.96E-05 |
| AP4E1   | -3.07 | -8.42 | 1.54E-07 |
| TOPBP1  | -3.08 | -8.43 | 2.60E-06 |
| HAGHL   | -3.08 | -8.44 | 4.47E-06 |
| NSRP1   | -3.09 | -8.52 | 2.97E-05 |
| SYDE2   | -3.09 | -8.52 | 1.38E-05 |
| BMP2K   | -3.09 | -8.53 | 3.21E-05 |
| ERICH1  | -3.10 | -8.55 | 1.06E-06 |
| NUP133  | -3.10 | -8.55 | 4.76E-07 |
| STAGL   | -3.10 | -8.55 | 1.15E-05 |

|          |       |       |           |
|----------|-------|-------|-----------|
| IRF2BP2  | -3.10 | -8.56 | 4.44E-06  |
| AKTIP    | -3.10 | -8.57 | 3.88E-05  |
| CCDC93   | -3.10 | -8.57 | 2.92E-06  |
| ARHGEF10 | -3.10 | -8.58 | 2.34E-06  |
| SLC25A13 | -3.10 | -8.58 | 6.82E-08  |
| PEX5     | -3.10 | -8.60 | 0.0001286 |
| BAMBI    | -3.11 | -8.61 | 6.62E-05  |
| CDC20    | -3.11 | -8.61 | 2.80E-07  |
| LPL      | -3.11 | -8.61 | 9.59E-08  |
| MTOR     | -3.11 | -8.61 | 4.84E-06  |
| HJURP    | -3.11 | -8.65 | 7.49E-07  |
| NLK      | -3.11 | -8.65 | 9.11E-06  |
| URB2     | -3.11 | -8.65 | 5.25E-08  |
| EBP      | -3.11 | -8.66 | 2.16E-07  |
| DCBLD1   | -3.12 | -8.67 | 1.17E-06  |
| MICAL2   | -3.12 | -8.67 | 1.71E-08  |
| RFTN1    | -3.12 | -8.69 | 2.70E-05  |
| DHCR7    | -3.12 | -8.71 | 9.63E-06  |
| CLCN6    | -3.13 | -8.73 | 7.75E-06  |
| IDI1     | -3.13 | -8.73 | 1.84E-06  |
| FASTKD3  | -3.13 | -8.74 | 6.11E-07  |
| SNX30    | -3.13 | -8.74 | 1.72E-05  |
| EDEM3    | -3.13 | -8.75 | 1.36E-05  |
| WEE1     | -3.13 | -8.75 | 2.32E-06  |
| JMJD7    | -3.13 | -8.77 | 1.56E-05  |
| NUP93    | -3.14 | -8.79 | 2.29E-07  |
| RCC1L    | -3.14 | -8.79 | 1.87E-06  |
| SLC12A2  | -3.14 | -8.79 | 1.94E-07  |
| FRMD4B   | -3.14 | -8.82 | 2.04E-05  |
| MED17    | -3.14 | -8.83 | 1.19E-05  |
| FBXL3    | -3.14 | -8.85 | 1.61E-05  |
| ANAPC7   | -3.15 | -8.86 | 1.81E-06  |
| TMF1     | -3.15 | -8.86 | 9.18E-06  |
| DIP2C    | -3.15 | -8.87 | 8.41E-07  |
| ANTXR1   | -3.15 | -8.90 | 2.39E-06  |
| VPS13C   | -3.15 | -8.90 | 2.34E-06  |
| HMOX2    | -3.16 | -8.91 | 5.25E-06  |
| IBSP     | -3.16 | -8.91 | 3.97E-09  |
| PRR11    | -3.16 | -8.94 | 6.74E-08  |
| PTCH1    | -3.16 | -8.95 | 7.24E-08  |
| MARCH5   | -3.16 | -8.97 | 4.67E-05  |
| ANKS1B   | -3.17 | -8.99 | 2.35E-05  |
| EAPP     | -3.18 | -9.04 | 7.40E-06  |
| SLC1A4   | -3.18 | -9.05 | 7.33E-08  |
| STAM     | -3.18 | -9.06 | 8.78E-08  |
| GPR146   | -3.18 | -9.09 | 6.41E-08  |
| TP53RK   | -3.19 | -9.10 | 2.32E-05  |
| AR       | -3.19 | -9.12 | 1.51E-05  |
| SYNE3    | -3.20 | -9.16 | 4.11E-06  |
| FBXL21   | -3.21 | -9.26 | 2.97E-06  |

|          |       |        |          |
|----------|-------|--------|----------|
| LMNB1    | -3.21 | -9.26  | 9.35E-08 |
| DVL1     | -3.22 | -9.30  | 2.38E-06 |
| BTBD11   | -3.22 | -9.33  | 2.66E-06 |
| ZYG11B   | -3.22 | -9.33  | 3.35E-06 |
| METTL14  | -3.22 | -9.35  | 1.18E-06 |
| DAPK1    | -3.23 | -9.36  | 2.21E-06 |
| RAB3GAP2 | -3.23 | -9.37  | 2.02E-08 |
| HEATR5B  | -3.23 | -9.40  | 5.84E-07 |
| BARD1    | -3.24 | -9.43  | 4.25E-08 |
| KLF2     | -3.24 | -9.46  | 5.69E-07 |
| ARL4A    | -3.24 | -9.48  | 5.55E-08 |
| TRRAP    | -3.25 | -9.49  | 4.65E-09 |
| SQLE     | -3.25 | -9.54  | 5.62E-07 |
| TMEM181  | -3.25 | -9.54  | 1.06E-05 |
| LDLR     | -3.26 | -9.58  | 2.81E-08 |
| ISY1     | -3.26 | -9.60  | 1.05E-05 |
| MTMR12   | -3.27 | -9.64  | 9.19E-07 |
| DUS3L    | -3.27 | -9.67  | 3.20E-07 |
| CDR2     | -3.28 | -9.69  | 1.75E-06 |
| BTG1     | -3.29 | -9.75  | 6.55E-06 |
| FZD8     | -3.29 | -9.78  | 1.70E-08 |
| MIS12    | -3.29 | -9.80  | 9.59E-08 |
| ZBTB5    | -3.30 | -9.83  | 3.85E-07 |
| AMOTL1   | -3.30 | -9.86  | 3.05E-07 |
| CIT      | -3.30 | -9.86  | 7.29E-08 |
| AURKA    | -3.30 | -9.87  | 2.42E-08 |
| TSHZ3    | -3.31 | -9.89  | 7.18E-07 |
| CBS      | -3.31 | -9.90  | 1.70E-07 |
| ZBTB8B   | -3.31 | -9.90  | 4.43E-07 |
| TEX10    | -3.31 | -9.92  | 2.49E-06 |
| SLU7     | -3.32 | -9.97  | 2.45E-06 |
| USP6NL   | -3.32 | -9.98  | 2.49E-06 |
| EPHA4    | -3.32 | -10.02 | 2.66E-08 |
| CYR61    | -3.33 | -10.06 | 3.48E-07 |
| PLEKHA5  | -3.34 | -10.16 | 2.77E-10 |
| USP32    | -3.37 | -10.31 | 4.53E-07 |
| KPNA2    | -3.37 | -10.33 | 9.68E-09 |
| LGR4     | -3.37 | -10.33 | 1.64E-06 |
| LIG4     | -3.38 | -10.41 | 4.10E-07 |
| PLK1     | -3.38 | -10.41 | 2.82E-09 |
| PRC1     | -3.38 | -10.43 | 6.41E-10 |
| SLC4A11  | -3.38 | -10.43 | 8.11E-09 |
| ZCCHC8   | -3.39 | -10.50 | 8.23E-09 |
| CIRBP    | -3.40 | -10.56 | 3.09E-09 |
| TOP2A    | -3.40 | -10.58 | 6.52E-11 |
| CENPC    | -3.42 | -10.67 | 1.22E-08 |
| KIF18A   | -3.42 | -10.67 | 5.76E-09 |
| NUSAP1   | -3.42 | -10.67 | 2.90E-08 |
| TRIM45   | -3.42 | -10.72 | 3.72E-08 |
| SEC24B   | -3.42 | -10.74 | 2.82E-07 |

|           |       |        |          |
|-----------|-------|--------|----------|
| ARHGAP11A | -3.43 | -10.77 | 2.77E-09 |
| TTF2      | -3.43 | -10.77 | 2.18E-09 |
| SSH1      | -3.45 | -10.90 | 6.47E-08 |
| CCNB3     | -3.45 | -10.95 | 1.26E-08 |
| NR2C1     | -3.45 | -10.95 | 9.71E-08 |
| FAM98A    | -3.47 | -11.05 | 1.04E-07 |
| INCENP    | -3.47 | -11.05 | 2.66E-09 |
| NFIL3     | -3.47 | -11.08 | 9.64E-09 |
| EP300     | -3.50 | -11.29 | 9.39E-08 |
| LOC395676 | -3.51 | -11.38 | 1.72E-08 |
| LUC7L3    | -3.51 | -11.38 | 2.15E-11 |
| IQSEC1    | -3.53 | -11.52 | 4.07E-07 |
| PPP1R3C   | -3.53 | -11.58 | 3.91E-12 |
| VLDLR     | -3.55 | -11.72 | 9.04E-10 |
| FAM20C    | -3.56 | -11.80 | 1.71E-05 |
| STK17B    | -3.57 | -11.88 | 1.30E-07 |
| STARD4    | -3.57 | -11.90 | 2.19E-09 |
| MYH1D     | -3.62 | -12.32 | 7.50E-16 |
| AACS      | -3.64 | -12.42 | 2.71E-09 |
| DHCR24    | -3.64 | -12.45 | 1.51E-09 |
| LRIG2     | -3.65 | -12.58 | 1.88E-08 |
| SPTY2D1   | -3.66 | -12.64 | 1.80E-08 |
| HASPIN    | -3.69 | -12.91 | 8.65E-11 |
| FASN      | -3.71 | -13.05 | 1.34E-10 |
| RERE      | -3.72 | -13.22 | 1.39E-09 |
| CTGF      | -3.75 | -13.41 | 4.24E-08 |
| AACS      | -3.78 | -13.78 | 5.11E-11 |
| ADNP2     | -3.81 | -14.03 | 2.07E-09 |
| GTF3C3    | -3.82 | -14.11 | 3.27E-10 |
| PKDCCA    | -3.88 | -14.69 | 1.36E-09 |
| KIF20A    | -3.90 | -14.89 | 1.18E-11 |
| FOXO1     | -3.94 | -15.31 | 2.19E-10 |
| FAM72A    | -3.96 | -15.52 | 2.80E-11 |
| LIN9      | -3.99 | -15.94 | 9.39E-11 |
| ROR1      | -4.01 | -16.06 | 7.04E-11 |
| KIF11     | -4.03 | -16.37 | 9.45E-14 |
| BUB1B     | -4.11 | -17.26 | 9.77E-12 |
| BBS12     | -4.49 | -22.53 | 2.48E-13 |
| KIAA1210  | -4.53 | -23.03 | 3.66E-12 |
| MKI67     | -4.55 | -23.48 | 9.92E-15 |
| CHAC1     | -4.79 | -27.60 | 1.90E-15 |
| PRPSAP1   | -4.90 | -29.87 | 6.67E-16 |

**Supplementary Table S4: Differentially expressed genes from HPAI data analysis**

| Gene         | Log2 Fold change | Fold change | p-value   |
|--------------|------------------|-------------|-----------|
| MTHFD2       | 2.29             | 4.89        | 4.49E-05  |
| ROPN1L       | 1.75             | 3.37        | 0.0001451 |
| LOC417056    | 1.73             | 3.32        | 8.65E-06  |
| REG1A        | 1.66             | 3.15        | 0.0001049 |
| ZBTB16       | 1.65             | 3.13        | 3.89E-05  |
| MC2R         | 1.64             | 3.11        | 0.0001104 |
| BF2          | 1.61             | 3.04        | 4.88E-05  |
| COL10A1      | 1.60             | 3.03        | 4.13E-05  |
| CXCL14       | 1.58             | 3.00        | 0.0001313 |
| EOGT         | 1.58             | 3.00        | 4.23E-05  |
| ANGPT1       | 1.53             | 2.89        | 5.61E-05  |
| CENPS        | 1.53             | 2.89        | 6.96E-05  |
| NPY          | 1.52             | 2.86        | 3.28E-05  |
| LOC418667    | 1.51             | 2.85        | 0.0001471 |
| CHRNA6       | 1.50             | 2.84        | 0.0001087 |
| COTL1        | 1.50             | 2.83        | 0.000129  |
| AvBD7        | 1.49             | 2.80        | 1.31E-05  |
| RNASE4       | 1.49             | 2.80        | 7.36E-05  |
| GNLY         | 1.49             | 2.80        | 0.0001077 |
| LOC100859715 | 1.48             | 2.79        | 0.0001443 |
| ATP8A1       | 1.48             | 2.79        | 0.0001257 |
| DUSP4        | 1.47             | 2.78        | 3.60E-05  |
| MPEG1        | 1.47             | 2.78        | 7.06E-05  |
| ERFE         | 1.46             | 2.76        | 0.0001382 |
| CPNE4        | 1.46             | 2.76        | 1.30E-06  |
| DDX60        | 1.46             | 2.76        | 9.46E-05  |
| NT5C3B       | 1.46             | 2.75        | 0.0001143 |
| LY96         | 1.44             | 2.71        | 6.40E-05  |
| CCK          | 1.43             | 2.70        | 1.10E-05  |
| HIST1H46     | 1.43             | 2.69        | 0.0001126 |
| NCOA2        | 1.42             | 2.68        | 8.50E-07  |
| DMBT1        | 1.42             | 2.67        | 0.0001478 |
| XPO1         | 1.42             | 2.67        | 9.01E-05  |
| KIF2A        | 1.42             | 2.67        | 6.59E-05  |
| EPSTI1       | 1.41             | 2.66        | 2.26E-05  |
| HERC4L       | 1.40             | 2.64        | 6.37E-05  |
| RNF213       | 1.40             | 2.64        | 3.95E-05  |
| GIMAP8L2     | 1.40             | 2.63        | 5.48E-06  |
| C3H8ORF80    | 1.40             | 2.63        | 7.89E-05  |
| LOC100857928 | 1.40             | 2.63        | 5.09E-05  |
| MINDY3       | 1.39             | 2.62        | 7.73E-05  |
| CMTR1        | 1.39             | 2.62        | 6.28E-05  |
| RSAD2        | 1.38             | 2.60        | 1.71E-05  |
| ETV7         | 1.38             | 2.60        | 7.83E-05  |
| LOC415325    | 1.38             | 2.60        | 2.16E-06  |
| CXorf21      | 1.37             | 2.59        | 4.25E-06  |
| FANCA        | 1.37             | 2.59        | 6.70E-06  |
| IFIT5        | 1.37             | 2.58        | 4.29E-05  |
| CATH1        | 1.37             | 2.58        | 1.17E-06  |
| MADPRT1      | 1.35             | 2.55        | 1.26E-05  |
| INHBB        | 1.35             | 2.55        | 0.0001154 |
| C11H19orf12  | 1.35             | 2.55        | 4.28E-05  |



|              |       |       |           |
|--------------|-------|-------|-----------|
| COL9A3       | 1.35  | 2.55  | 9.24E-06  |
| GCH1         | 1.35  | 2.55  | 7.82E-06  |
| IRF7         | 1.34  | 2.54  | 4.76E-05  |
| DESI2L       | 1.34  | 2.52  | 2.00E-05  |
| CRISPLD2     | 1.33  | 2.51  | 3.90E-05  |
| MX1          | 1.33  | 2.51  | 6.44E-07  |
| CALHM6       | 1.33  | 2.51  | 6.36E-06  |
| PRDM12       | 1.32  | 2.50  | 0.000144  |
| IFNW1        | 1.31  | 2.48  | 2.12E-05  |
| CCAH221      | 1.31  | 2.47  | 8.29E-08  |
| PMAIP1       | 1.31  | 2.47  | 7.07E-05  |
| IL17REL      | 1.30  | 2.46  | 7.90E-05  |
| SPTBN5       | 1.30  | 2.46  | 1.23E-06  |
| SAMD9L       | 1.28  | 2.44  | 5.71E-06  |
| GVINP1       | 1.28  | 2.43  | 7.28E-07  |
| CMPK2        | 1.26  | 2.40  | 2.53E-07  |
| BATF3        | 1.26  | 2.39  | 1.12E-05  |
| LOC420107    | 1.26  | 2.39  | 6.11E-07  |
| AKR          | 1.25  | 2.39  | 7.72E-07  |
| IFI27L1      | 1.25  | 2.38  | 3.32E-07  |
| SRI          | 1.25  | 2.38  | 5.46E-07  |
| PLACL2       | 1.25  | 2.37  | 5.58E-07  |
| LYGL         | 1.24  | 2.36  | 3.50E-07  |
| CCL4         | 1.23  | 2.35  | 4.29E-07  |
| USP18        | 1.23  | 2.35  | 6.81E-08  |
| CCL19        | 1.23  | 2.35  | 5.59E-08  |
| TOR1BL       | 1.23  | 2.35  | 1.43E-07  |
| SLC17A6      | 1.22  | 2.33  | 0.0001009 |
| OASL         | 1.22  | 2.32  | 1.75E-08  |
| AVD          | 1.21  | 2.32  | 1.99E-10  |
| LOC415756    | 1.21  | 2.32  | 2.35E-07  |
| F3           | 1.18  | 2.27  | 3.05E-06  |
| IL6          | 1.16  | 2.23  | 3.06E-07  |
| IFI6         | 1.15  | 2.23  | 7.06E-08  |
| IL8L2        | 1.15  | 2.22  | 1.38E-06  |
| K123         | 1.15  | 2.21  | 5.84E-08  |
| LOC101750271 | 1.14  | 2.21  | 1.18E-08  |
| SMKR1        | -1.55 | -2.93 | 0.0003545 |
| CYP3A5       | -1.74 | -3.34 | 0.0002409 |
| FOXJ1        | -1.75 | -3.37 | 0.000331  |
| DNAH9        | -1.95 | -3.85 | 0.000104  |
| PACRG        | -1.97 | -3.91 | 0.0001524 |
| PIGR         | -2.03 | -4.08 | 0.0001606 |
| RSPH1        | -2.03 | -4.09 | 3.71E-05  |
| DYDC1        | -2.06 | -4.16 | 1.10E-05  |
| AK7          | -2.08 | -4.22 | 7.56E-05  |
| C11orf88     | -2.16 | -4.46 | 4.75E-05  |
| BLB1         | -2.16 | -4.46 | 0.0003432 |
| CSTA         | -2.19 | -4.55 | 0.0002587 |
| PIH1D3       | -2.19 | -4.56 | 0.0001811 |
| TAL1         | -2.19 | -4.57 | 6.45E-05  |
| RAB36        | -2.20 | -4.60 | 6.10E-05  |
| SNTN         | -2.21 | -4.64 | 4.75E-05  |
| CDHR3        | -2.25 | -4.77 | 4.51E-05  |

|              |       |        |           |
|--------------|-------|--------|-----------|
| LRRC6        | -2.28 | -4.85  | 0.0001075 |
| ARMC4        | -2.33 | -5.03  | 0.000293  |
| ACVR2B       | -2.34 | -5.07  | 0.0003331 |
| ADCY8        | -2.43 | -5.40  | 0.0001748 |
| CXCR4        | -2.44 | -5.41  | 0.0001835 |
| SALL1        | -2.44 | -5.41  | 0.000197  |
| MMP13        | -2.45 | -5.45  | 0.000142  |
| ENKUR        | -2.45 | -5.45  | 4.18E-06  |
| SERPIND1     | -2.47 | -5.55  | 0.0001809 |
| KMT5B        | -2.48 | -5.56  | 0.0003282 |
| SAMD12       | -2.50 | -5.64  | 8.26E-05  |
| RASL11B      | -2.51 | -5.70  | 0.0002586 |
| EDN2         | -2.52 | -5.75  | 0.00023   |
| MEIS2        | -2.53 | -5.77  | 0.0002674 |
| PRTFDC1      | -2.53 | -5.79  | 0.0003215 |
| TPH1         | -2.54 | -5.80  | 0.000298  |
| PCDH17       | -2.59 | -6.02  | 3.26E-05  |
| CGNL1        | -2.61 | -6.10  | 9.51E-05  |
| TFPI         | -2.62 | -6.14  | 2.57E-05  |
| AP1S3        | -2.63 | -6.21  | 0.0001795 |
| CCDC141      | -2.66 | -6.30  | 1.96E-05  |
| UBAP2        | -2.66 | -6.31  | 0.0002476 |
| SLC9A9       | -2.67 | -6.37  | 0.0003191 |
| NPTX2        | -2.68 | -6.42  | 0.0003126 |
| DNAH5L       | -2.69 | -6.45  | 3.12E-05  |
| SPP1         | -2.69 | -6.46  | 9.69E-06  |
| ALKAL2       | -2.69 | -6.46  | 3.49E-05  |
| ATP5MF       | -2.72 | -6.60  | 0.0001356 |
| RIPPLY2      | -2.83 | -7.09  | 6.59E-05  |
| NIPBL        | -2.83 | -7.13  | 8.91E-05  |
| SH3TC1       | -2.83 | -7.13  | 2.16E-05  |
| SLC6A2       | -2.84 | -7.17  | 4.17E-05  |
| RASGRP3      | -2.86 | -7.28  | 8.03E-06  |
| ATP5O        | -2.87 | -7.32  | 4.54E-05  |
| BMP2         | -2.91 | -7.51  | 0.0001659 |
| UMPS         | -2.93 | -7.60  | 1.74E-05  |
| ATP1B3       | -3.00 | -8.00  | 0.0001015 |
| NPR3         | -3.00 | -8.00  | 8.90E-05  |
| PTGR1        | -3.01 | -8.05  | 0.0002977 |
| CHST15       | -3.08 | -8.47  | 5.94E-06  |
| OXSR1        | -3.16 | -8.97  | 7.75E-05  |
| SMIM3        | -3.17 | -8.98  | 0.0003359 |
| PRRG1        | -3.23 | -9.40  | 6.60E-06  |
| CLDN1        | -3.29 | -9.76  | 0.000122  |
| TNFRSF1B     | -3.29 | -9.80  | 5.60E-07  |
| SLC44A1      | -3.31 | -9.92  | 3.70E-05  |
| SUCLG2       | -3.35 | -10.18 | 6.06E-06  |
| HSP90B1      | -3.35 | -10.21 | 0.000226  |
| ZFRL1        | -3.35 | -10.21 | 2.28E-05  |
| AGA          | -3.37 | -10.31 | 0.0002488 |
| BROX         | -3.42 | -10.74 | 1.89E-05  |
| CCNJ         | -3.49 | -11.23 | 1.52E-07  |
| USP12        | -3.52 | -11.46 | 0.0002076 |
| LOC101750526 | -3.54 | -11.62 | 1.81E-07  |

|             |       |        |           |
|-------------|-------|--------|-----------|
| FBXL4       | -3.66 | -12.60 | 3.03E-06  |
| JARID2      | -3.67 | -12.76 | 0.0002344 |
| CA4         | -3.68 | -12.80 | 3.88E-07  |
| NES         | -3.70 | -13.01 | 6.15E-05  |
| ZSWIM6L     | -3.76 | -13.55 | 9.66E-05  |
| NLRP1L      | -3.79 | -13.85 | 8.50E-06  |
| LOC423277   | -3.81 | -14.01 | 7.07E-05  |
| DIEXF       | -4.07 | -16.83 | 0.0002332 |
| ORAI1       | -4.14 | -17.57 | 0.0001822 |
| RAMP3       | -4.15 | -17.71 | 3.85E-06  |
| DISP1       | -4.18 | -18.11 | 0.0001241 |
| DUSP1       | -4.18 | -18.14 | 0.0001943 |
| KIAA1107    | -4.23 | -18.70 | 0.0001746 |
| EEPDI       | -4.26 | -19.17 | 5.05E-06  |
| KCNMA1      | -4.37 | -20.74 | 0.0001486 |
| RCBTB2      | -4.39 | -21.00 | 0.0001654 |
| TLR5        | -4.47 | -22.15 | 1.33E-07  |
| AQR         | -4.49 | -22.48 | 0.0002056 |
| AASDHPPT    | -4.52 | -22.98 | 3.49E-05  |
| MYO10       | -4.62 | -24.54 | 1.63E-05  |
| ROCK2       | -4.63 | -24.82 | 5.27E-05  |
| SLC4A11     | -4.79 | -27.73 | 2.81E-05  |
| LOC431003   | -4.82 | -28.24 | 2.93E-06  |
| F2R         | -4.87 | -29.25 | 9.71E-05  |
| TAMM41      | -4.87 | -29.32 | 0.0001184 |
| NR2C1       | -4.89 | -29.66 | 9.85E-05  |
| XRCC3       | -4.93 | -30.51 | 0.0001746 |
| NUP98       | -4.99 | -31.78 | 0.0002212 |
| BTF3L       | -5.13 | -35.11 | 7.70E-07  |
| PARD6G      | -5.14 | -35.19 | 0.0002972 |
| HAUS8       | -5.16 | -35.72 | 0.0003187 |
| SNX30       | -5.18 | -36.17 | 0.0002738 |
| WNT2B       | -5.19 | -36.62 | 0.0001501 |
| TMEM26      | -5.30 | -39.30 | 2.67E-05  |
| ADRM1       | -5.33 | -40.31 | 0.0003117 |
| C4H20ORF194 | -5.39 | -41.90 | 1.07E-05  |
| DCBLD1      | -5.45 | -43.68 | 5.23E-05  |
| MED27       | -5.45 | -43.68 | 0.0002588 |
| TNFAIP8L1   | -5.45 | -43.68 | 9.98E-05  |
| CHAC1       | -5.56 | -47.29 | 0.0001855 |
| FILIP1L     | -5.70 | -51.99 | 2.93E-05  |
| CHDB1       | -5.72 | -52.56 | 5.06E-07  |
| HNRNPKL     | -5.75 | -53.88 | 6.94E-08  |
| MYH10       | -5.77 | -54.48 | 0.0002668 |
| BAMBI       | -5.88 | -59.09 | 0.000109  |
| ORMDL3      | -5.93 | -60.96 | 0.0002083 |
| KCNQ1       | -5.93 | -61.14 | 4.51E-05  |
| CDR2        | -5.95 | -61.84 | 0.0001129 |
| COQ8B       | -5.96 | -62.37 | 0.000149  |
| GNAI1       | -5.99 | -63.64 | 0.0003354 |
| CABIN1      | -6.19 | -73.24 | 0.0002594 |
| PANK1       | -6.25 | -76.14 | 6.71E-05  |
| LGR4        | -6.31 | -79.43 | 0.0002151 |
| EED         | -6.34 | -80.89 | 0.0002268 |

|              |         |             |           |
|--------------|---------|-------------|-----------|
| ANKS1B       | -6.51   | -91.24      | 0.0002097 |
| LOC100859072 | -6.52   | -91.81      | 1.10E-08  |
| FNIP2        | -6.56   | -94.15      | 4.91E-06  |
| PPP1R3B      | -6.64   | -99.67      | 8.47E-05  |
| CAV2         | -6.69   | -103.58     | 1.37E-05  |
| RNF151       | -6.77   | -109.44     | 0.0002762 |
| MCCC2L       | -6.84   | -114.94     | 4.33E-05  |
| RECQL        | -7.00   | -128.28     | 6.82E-06  |
| IVNS1ABP     | -7.27   | -153.83     | 3.81E-05  |
| SLC4A7       | -7.28   | -155.45     | 8.09E-06  |
| PEX14        | -7.30   | -157.09     | 0.000285  |
| HMG20A       | -7.48   | -178.50     | 0.0001705 |
| TYRO3        | -7.50   | -181.09     | 1.71E-05  |
| ZMYM2        | -7.55   | -187.76     | 0.0001878 |
| UHRF1        | -7.91   | -240.81     | 5.92E-05  |
| ARHGAP24     | -7.97   | -251.14     | 0.0001712 |
| PAPD7        | -7.99   | -254.04     | 0.0001755 |
| ST5          | -8.13   | -280.96     | 0.0002267 |
| SPIN1W       | -8.17   | -288.77     | 4.83E-08  |
| FAM107B      | -8.54   | -371.86     | 7.17E-05  |
| NDNF         | -8.61   | -390.70     | 0.0001072 |
| CEP192       | -8.66   | -405.57     | 0.0002991 |
| METTL14      | -8.84   | -458.16     | 6.41E-05  |
| MIER3L       | -9.15   | -568.67     | 1.31E-07  |
| DTNBP1       | -9.16   | -573.70     | 0.0001237 |
| BET1         | -9.45   | -701.59     | 0.0001991 |
| FAM98A       | -9.67   | -816.46     | 0.0001907 |
| TXNL1        | -9.79   | -888.17     | 1.81E-07  |
| CRIP1        | -10.28  | -1244.76    | 0.0002993 |
| ABHD17B      | -10.36  | -1314.54    | 3.76E-05  |
| TP53RK       | -10.44  | -1388.82    | 3.45E-05  |
| ZYG11B       | -10.97  | -2011.24    | 0.0003324 |
| FAM20C       | -11.08  | -2166.09    | 0.0002585 |
| BPGM         | -11.16  | -2284.95    | 2.77E-06  |
| KIAA1210     | -11.18  | -2322.04    | 2.15E-05  |
| PDGFRA       | -11.66  | -3227.03    | 8.82E-05  |
| STAM         | -11.87  | -3737.76    | 4.26E-05  |
| KLF2         | -11.98  | -4026.70    | 1.23E-06  |
| SPRED2       | -12.70  | -6663.86    | 6.95E-05  |
| TLK1L        | -12.76  | -6912.92    | 2.28E-05  |
| IREB2        | -12.98  | -8068.22    | 4.23E-05  |
| GEM          | -13.46  | -11297.15   | 2.55E-06  |
| IRF2BP2      | -13.49  | -11518.76   | 0.0002428 |
| FOXO1        | -14.05  | -16904.84   | 3.75E-05  |
| STK17B       | -15.31  | -40502.70   | 1.33E-05  |
| PKDCCA       | -17.32  | -163122.28  | 4.36E-07  |
| CTGF         | -18.34  | -332039.41  | 2.49E-06  |
| MARCH5       | -18.56  | -386040.98  | 4.32E-05  |
| FGFBP1       | -18.69  | -422174.03  | 8.98E-06  |
| IQSEC1       | -22.72  | -6917013.00 | 1.39E-05  |
| HINTW        | -150.44 | #####       | 1.62E-11  |

**Supplementary Table S5: Gene Ontology of up-regulated HPAI DEGs**

| source             | Term name             | Adjusted p value | Intersection size |
|--------------------|-----------------------|------------------|-------------------|
| GO:MF <sup>1</sup> | receptor ligand       | 0.000176         | 11                |
| GO:MF              | signaling receptor    | 0.000199         | 11                |
| GO:MF              | receptor regulator    | 0.000352         | 11                |
| GO:BP <sup>2</sup> | response to external  | 8.15E-06         | 26                |
| GO:BP              | response to other     | 2.66E-08         | 21                |
| GO:BP              | response to external  | 2.81E-08         | 21                |
| GO:BP              | response to biotic    | 4.73E-08         | 21                |
| GO:BP              | defense response      | 2.10E-07         | 21                |
| GO:BP              | interspecies          | 2.76E-06         | 21                |
| GO:CC <sup>3</sup> | extracellular space   | 0.000532         | 21                |
| GO:CC              | extracellular region  | 0.000145         | 18                |
| KEGG               | Influenza A           | 0.00044          | 7                 |
| KEGG               | Cytokine-cytokine     | 0.033055         | 6                 |
| KEGG               | NOD-like receptor     | 0.030848         | 5                 |
| KEGG               | Toll-like receptor    | 0.004656         | 5                 |
| REAC <sup>4</sup>  | Immune System         | 0.000973         | 20                |
| REAC               | Innate Immune         | 0.024546         | 13                |
| TF <sup>5</sup>    | Factor: IRF; motif:   | 0.004008         | 20                |
| TF                 | Factor: IRF; motif:   | 0.002202         | 16                |
| TF                 | Factor: IRF; motif:   | 0.003641         | 14                |
| TF                 | Factor: ICSBP; motif: | 0.004731         | 14                |
| TF                 | Factor: IRF-1; motif: | 0.00793          | 10                |

<sup>1</sup>. Gene Ontology Molecular Function

<sup>2</sup>. Gene Ontology Biological Process

<sup>3</sup>. Gene Ontology Cellular Component

<sup>4</sup>. Reactome

<sup>5</sup>. Transcription factors

**Supplementary Table S6: Gene Ontology of down-regulated HPAI DEGs**

| Source             | Term name                            | Adjusted p value | Intersection size |
|--------------------|--------------------------------------|------------------|-------------------|
| GO:BP <sup>1</sup> | determination of left/right symmetry | 0.049035         | 7                 |
| GO:BP              | axoneme assembly                     | 0.024977         | 6                 |
| GO:BP              | outer dynein arm assembly            | 0.016589         | 4                 |
| TF <sup>2</sup>    | Factor: E2F; motif: GGCGSG           | 0.049508         | 113               |
| TF                 | Factor: Sp1; motif: NGGGGCGGGGN      | 0.047709         | 92                |

<sup>1</sup>Gene Ontology Biological Process<sup>2</sup>Transcription factors

**Supplementary Table S7: Gene Ontology of up-regulated LPAI DEGs**

| Source             | Term name                                                  | Adjusted p value | Intersection size |
|--------------------|------------------------------------------------------------|------------------|-------------------|
| GO:MF <sup>1</sup> | identical protein binding                                  | 0.020594         | 15                |
| GO:BP <sup>2</sup> | positive regulation of biological process                  | 0.000187         | 37                |
| GO:BP              | positive regulation of cellular process                    | 0.001194         | 34                |
| GO:BP              | gene expression                                            | 0.002064         | 34                |
| GO:BP              | positive regulation of metabolic process                   | 0.000212         | 29                |
| GO:BP              | positive regulation of macromolecule metabolic process     | 0.000179         | 28                |
| GO:BP              | regulation of gene expression                              | 0.019466         | 28                |
| GO:BP              | positive regulation of nitrogen compound metabolic process | 0.000545         | 26                |
| GO:CC <sup>3</sup> | side of membrane                                           | 0.030987         | 9                 |
| GO:CC              | IkappaB kinase complex                                     | 0.015049         | 2                 |
| GO:CC              | macrophage migration inhibitory factor receptor complex    | 0.005031         | 2                 |
| KEGG               | Herpes simplex virus 1 infection                           | 1.06E-08         | 12                |
| KEGG               | Cell adhesion molecules                                    | 5.19E-05         | 8                 |
| KEGG               | MAPK signaling pathway                                     | 0.016731         | 8                 |
| KEGG               | ErbB signaling pathway                                     | 0.000695         | 6                 |
| KEGG               | Phagosome                                                  | 0.013416         | 6                 |
| KEGG               | Cellular senescence                                        | 0.02002          | 6                 |
| REAC <sup>4</sup>  | Immune System                                              | 3.67E-06         | 22                |
| REAC               | Innate Immune System                                       | 0.008822         | 13                |
| REAC               | Adaptive Immune System                                     | 0.005621         | 11                |
| WP <sup>5</sup>    | FAS pathway and Stress induction of HSP regulation         | 0.000262         | 5                 |
| WP                 | NLR Proteins                                               | 0.040351         | 2                 |
| TF <sup>6</sup>    | Factor: HSF2; motif: NGAANNWTCK                            | 0.023439         | 31                |

1. Gene Ontology Molecular Function

2. Gene Ontology Biological Process

3. Gene Ontology Cellular Component

4. Reactome

5. Wiki Pathways

6. Transcription factors

**Supplementary Table S8: Gene Ontology of down-regulated LPAI DEGs**

| Source             | Term name                                          | Adjusted p value | Intersection size |
|--------------------|----------------------------------------------------|------------------|-------------------|
| GO:MF <sup>1</sup> | binding                                            | 4.90E-22         | 1772              |
| GO:MF              | protein binding                                    | 2.95E-28         | 1243              |
| GO:MF              | ion binding                                        | 1.67E-08         | 768               |
| GO:BP <sup>2</sup> | cellular process                                   | 3.19E-07         | 2040              |
| GO:BP              | biological regulation                              | 2.20E-07         | 1445              |
| GO:BP              | metabolic process                                  | 0.000179         | 28                |
| GO:BP              | regulation of gene expression                      | 6.51E-05         | 1438              |
| GO:BP              | organic substance metabolic process                | 2.94E-07         | 1380              |
| GO:BP              | regulation of biological process                   | 3.80E-07         | 1361              |
| GO:BP              | cellular metabolic process                         | 8.63E-10         | 1353              |
| GO:BP              | primary metabolic process                          | 7.21E-07         | 1315              |
| GO:BP              | regulation of cellular process                     | 3.20E-06         | 1302              |
| GO:CC <sup>3</sup> | intracellular                                      | 9.16E-55         | 1850              |
| GO:CC              | organelle                                          | 1.59E-41         | 1670              |
| GO:CC              | intracellular organelle                            | 9.85E-47         | 1645              |
| GO:CC              | membrane-bounded organelle                         | 9.28E-45         | 1509              |
| KEGG               | Cell cycle                                         | 5.18E-06         | 44                |
| KEGG               | RNA transport                                      | 0.00362          | 44                |
| KEGG               | Ubiquitin mediated proteolysis                     | 0.039939         | 38                |
| KEGG               | ECM-receptor interaction                           | 0.001189         | 28                |
| KEGG               | Progesterone-mediated oocyte maturation            | 0.013183         | 27                |
| KEGG               | Steroid biosynthesis                               | 0.020207         | 10                |
| REAC <sup>4</sup>  | Cell Cycle                                         | 4.29E-20         | 130               |
| REAC               | Cell Cycle, Mitotic                                | 4.52E-19         | 120               |
| REAC               | M Phase                                            | 1.31E-13         | 89                |
| REAC               | Signaling by Rho GTPases                           | 0.000398         | 82                |
| REAC               | Mitotic Prometaphase                               | 4.11E-10         | 61                |
| WP <sup>5</sup>    | Cholesterol Biosynthesis                           | 0.004512         | 8                 |
| HP <sup>6</sup>    | Abnormality of head or neck                        | 0.024855         | 501               |
| HP                 | Abnormality of the head                            | 0.045422         | 496               |
| HP                 | Abnormal nervous system morphology                 | 0.003602         | 483               |
| HP                 | Abnormality of the musculature                     | 0.000272         | 466               |
| HP                 | Abnormality of the face                            | 0.009479         | 460               |
| TF <sup>7</sup>    | Factor: Cdx-1; motif: TTTATK                       | 2.02E-08         | 1721              |
| TF                 | Factor: Pax-5; motif: RRMSWGANWYCTNRAGCGKRACSRYSNM | 0.000343         | 1662              |
| TF                 | Factor: Churchill; motif: CGGGNN                   | 0.00844          | 1631              |
| TF                 | Factor: HOXA13; motif: ATAAMA                      | 7.97E-06         | 1582              |
| TF                 | Factor: E2F; motif: GGCGSC                         | 8.13E-30         | 1541              |

1. Gene Ontology Molecular Function

2. Gene Ontology Biological Process

3. Gene Ontology Cellular Component

4. Reactome

5. Wiki Pathways

6. Human phenotype

7. Transcription factors



Supplementary Table S9: Upstream activators of DEGs identified after H5N1 HPAI challenge

| Upstream Regulator | Molecule Type                     | Predicted Activation State | Activation z score | p-value of overlap | Target Molecules in Dataset                | Mechanistic Network |
|--------------------|-----------------------------------|----------------------------|--------------------|--------------------|--------------------------------------------|---------------------|
| IFNG               | cytokine                          | Activated                  | 3.332              | 0.000000122        | ALKAL2,CALHM6,CCL19,CCL4,CCN2,CHAC1,C      | 94 (21)             |
| IFNB1              | cytokine                          | Activated                  | 2.762              | 0.00000851         | CCL4,CMPK2,CYP3A5,F2R,HLA-A,IFI6,IL6,IRF7, | 94 (19)             |
| MSC                | transcription regulator           | Activated                  | 2.236              | 0.000487           | CCL4,DDX60,EPSTI1,IRF7,SPP1                |                     |
| SPI1               | transcription regulator           | Activated                  | 2.529              | 0.000579           | CCL4,CMPK2,CSF2RA,FOXO1,IFI6,IRF7,MX1,O/   | 118 (21)            |
| TGM2               | enzyme                            | Activated                  | 2.63               | 0.00127            | ATP1B3,DDX60,IFI6,IFIT5,IL6,OASL,RNF213,SA | 57 (7)              |
| TMPRSS2-ERG        | fusion gene/product               | Activated                  | 2.236              | 0.0165             | ARHGAP28,CHAC1,CSTA,OASL,SAMD9L            |                     |
| HDAC4              | transcription regulator           | Activated                  | 2.195              | 0.0221             | IL6,KLF2,MMP13,MYH10,RSAD2                 |                     |
| NR3C1              | ligand-dependent nuclear receptor | Inhibited                  | -2.107             | 0.00000319         | BMP2,CCL4,COQ8B,CXCR4,CYP3A5,DUSP1,DU:     | 110 (17)            |
| SIRT1              | transcription regulator           | Inhibited                  | -2.385             | 0.0000111          | CMPK2,COL10A1,DDX60,FOXO1,HLA-A,IL6,IRF    | 84 (19)             |
| MAPK1              | kinase                            | Inhibited                  | -2.05              | 0.0000114          | CCL4,CCN2,CSTA,DUSP1,FOXO1,IFI6,IFIT5,IL6, | 105 (20)            |
| PTGER4             | G-protein coupled receptor        | Inhibited                  | -2.449             | 0.0000124          | CCL4,CMPK2,CXCR4,IL6,IRF7,MMP13,RNF213,F   | 101 (25)            |
| MRTFB              | transcription regulator           | Inhibited                  | -2.183             | 0.000149           | CCN2,CXCR4,F2R,FILIP1L,HLA-A,MYH10,PDGF    |                     |
| NKX2-3             | transcription regulator           | Inhibited                  | -2.53              | 0.000245           | BMP2,CMPK2,DDX60,GCH1,KLF2,PMAIP1,RNF:     |                     |
| LMNA               | other                             | Inhibited                  | -2                 | 0.000898           | ACKR4,BAMBI,CCN2,DUSP4,FLT1,KCNQ1,NES,     | 70 (12)             |
| TET2               | enzyme                            | Inhibited                  | -2.39              | 0.00127            | CMPK2,IL6,KLF2,MMP13,RSAD2,SLC4A11,ZBTI    |                     |
| IL4                | cytokine                          | Inhibited                  | -2.409             | 0.00143            | ADRM1,BPGM,CCL4,CMPK2,CXCR4,F2R,F3,FL1     | 81 (17)             |
| RNF31              | enzyme                            | Inhibited                  | -2                 | 0.0016             | CCL19,CCL4,CXCR4,IL6,KCNMA1                | 94 (13)             |
| ESR1               | ligand-dependent nuclear receptor | Inhibited                  | -2.16              | 0.0018             | AP1S3,BMP2,CAV2,CCL4,CLDN1,COTL1,DOCK-     | 105 (17)            |
| Esrra              | transcription regulator           | Inhibited                  | -2.236             | 0.00221            | ATP5MF,ATP5PO,BPGM,IL6,KCNQ1,SPP1          |                     |
| WNT3A              | cytokine                          | Inhibited                  | -2.027             | 0.00252            | ANGPT1,BMP2,CCN2,IL6,LRR32,MMP13,NDNF      | 90 (16)             |
| CLEC4G             | other                             | Inhibited                  | -2                 | 0.00412            | BMP2,CCN2,IL6,WNT2B                        |                     |
| MYC                | transcription regulator           | Inhibited                  | -2.055             | 0.00416            | ANGPT1,CHST15,DUSP1,DUSP4,EED,F2R,F3,HL    | 114 (23)            |
| IL10               | cytokine                          | Inhibited                  | -3.088             | 0.00636            | BMP2,CCL19,CCL4,CXCR4,DUSP1,F3,IL6,LY96,I  | 104 (21)            |
| IL10RA             | transmembrane receptor            | Inhibited                  | -2.985             | 0.0101             | BMP2,CALHM6,HLA-A,IL6,IRF7,PDGFRA,RNF2     |                     |
| STAT6              | transcription regulator           | Inhibited                  | -2.203             | 0.0109             | CMPK2,FNIP2,IL6,IRF7,MMP13,MPEG1,OASL,R    |                     |
| BMP10              | growth factor                     | Inhibited                  | -2                 | 0.023              | ANGPT1,CMPK2,HLA-A,RSAD2                   |                     |
| Tgf beta           | group                             | Inhibited                  | -2.156             | 0.0231             | BAMBI,CCL4,CCN2,COL10A1,CXCR4,IL6,MMP1     |                     |
| SATB1              | transcription regulator           | Inhibited                  | -2.2               | 0.0434             | DUSP4,EPSTI1,IRF7,KLF2,UHRF1               |                     |
| RARB               | ligand-dependent nuclear receptor | Inhibited                  | -2                 | 0.14               | IL6,REG1A,SPP1,USP18                       |                     |
| RARA               | ligand-dependent nuclear receptor | Inhibited                  | -2                 | 0.24               | DUSP1,IL6,NR2C1,RSAD2,SPP1,TNFAIP8L1       |                     |
